# Supplementary material for: Facile synthesis of fluorescent hetero[8]circulene analogues with tunable solubilities and optical properties
Source: PubMed Central journal article supplement — Chem Sci. 2019 Oct 30;10(48):11006–12. doi: 10.1039/c9sc05087f (PMC7012041; doi:10.1039/c9sc05087f), 2019-10-30
Supplement: SC-010-C9SC05087F-s001.pdf [file SC-010-C9SC05087F-s001.pdf]

*Electronic Supplementary Material*

**Facile synthesis of fluorescent hetero[8]circulene analogues with  
tunable solubilities and optical properties**

**Yusuke Matsuo, Fengkun Chen, Koki Kise, Takayuki Tanaka\* and Atsuhiko Osuka**

Department of Chemistry, Graduate School of Science, Kyoto University, Sakyo-ku, Kyoto 606-8502, Japan.

E-mail: taka@kuchem.kyoto-u.ac

Contents

|                                         |    |
|-----------------------------------------|----|
| 1. Instrumentation and Materials.....   | 2  |
| 2. Experimental Section.....            | 3  |
| 3. NMR Spectra.....                     | 11 |
| 4. Mass Spectra.....                    | 27 |
| 5. DFT Calculations.....                | 30 |
| 6. X-Ray Crystallographic Details.....  | 43 |
| 7. Absorption and Emission Spectra..... | 51 |
| 8. Fluorescence Lifetime.....           | 57 |
| 9. Solubility.....                      | 61 |
| 10. Optical Resolution.....             | 62 |
| 11. Supporting References.....          | 64 |

## 1. Instrumentation and Materials

Commercially available solvents and reagents were used without further purification unless otherwise noted. 2,5-bis(2-bromophenyl)-1*H*-pyrrole<sup>[S1]</sup>, 5-methoxy-2-(4,4,5,5-tetramethyl-1,3,2-dioxaborolan-2-yl)-1*H*-indole<sup>[S2]</sup> and 5-chloro-2-(4,4,5,5-tetramethyl-1,3,2-dioxaborolan-2-yl)-1*H*-indole<sup>[S2]</sup> were prepared according to the reported procedures, respectively. Dry dichloromethane was purchased from Wako Pure Chemical Industries, Ltd. Dry tetrahydrofuran (THF) was obtained by passing through alumina under N<sub>2</sub> in a solvent purification system. The spectroscopic grade solvents were used as solvents for all spectroscopic studies. Silica gel column chromatography was performed on Wako gel C-300. Thin-layer chromatography (TLC) was carried out on aluminum sheets coated with silica gel 60 F<sub>254</sub> (Merck 5554). UV-visible absorption spectra were recorded on a Shimadzu UV-3600. Fluorescence spectra were recorded on a JASCO FP-8500 spectrometer. Absolute fluorescence quantum yields were determined on a HAMAMATSU C9920-02S. Fluorescence lifetime was recorded on a Hamamatsu Photonics Quantaaurus-Tau C11367. <sup>1</sup>H and <sup>13</sup>C NMR spectra were recorded on a JEOL ECA-600 spectrometer (operating as 600 MHz for <sup>1</sup>H and 150 MHz for <sup>13</sup>C) and chemical shifts were reported as the  $\delta$  scale in ppm relative to internal standards CHCl<sub>3</sub> ( $\delta$  = 7.26 ppm for <sup>1</sup>H, 77.16 ppm for <sup>13</sup>C), acetone ( $\delta$  = 2.05 ppm for <sup>1</sup>H,  $\delta$  = 29.84 ppm for <sup>13</sup>C), THF ( $\delta$  = 25.31 ppm for <sup>13</sup>C) and DMSO ( $\delta$  = 2.50 ppm for <sup>1</sup>H). High-resolution atmospheric-pressure-chemical-ionization time-of-flight mass-spectrometry (HR-APCI-TOF-MS) was recorded on a BRUKER micrOTOF model using positive mode. High-resolution matrix-assisted-laser-dissociation- ionization time-of-flight mass spectrometry (HR-MALDI-TOF-MS) was recorded on a BRUKER ultrafleXterme MALDI-TOF/TOF spectrometer using matrix. Single-crystal diffraction analysis data were collected at -180 °C with a Rigaku XtaLAB P200 by using graphite monochromated Cu-*K* $\alpha$  radiation ( $\lambda$ = 1.54187 Å). The structures were solved by direct methods (SHELXT-2014/5) and refined with full-matrix least squares technique (SHELXT-2014/7)<sup>[S3]</sup>

## 2. Experimental Section

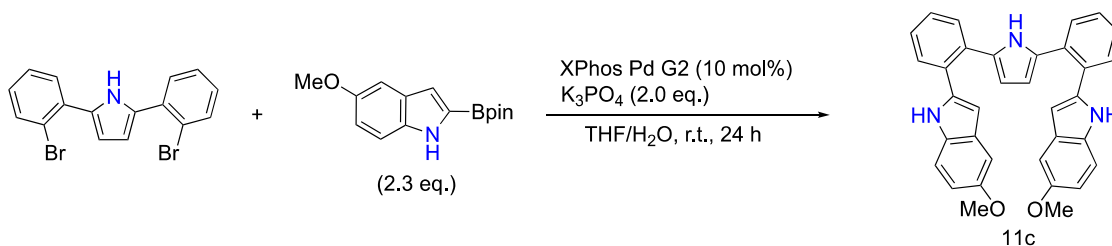

### 2,5-bis(2-(5-methoxy-1H-indol-2-yl)phenyl)-1H-pyrrole (**11c**)

To a 500 mL three-necked round bottom flask, XPhos Pd G2 (472 mg, 0.60 mmol, 10 mol%), 2,5-bis(2-bromophenyl)-1H-pyrrole (2.26 g, 6.0 mmol) and 5-methoxy-2-(4,4,5,5-tetramethyl-1,3,2-dioxaborolan-2-yl)-1H-indole (3.69 g, 13.5 mmol, 2.3 eq.) were charged. The reaction flask was evacuated and purged with argon three times. After the mixture was dissolved in dry THF (120 mL), degassed aqueous 0.5 M tripotassium phosphate solution (120 mL) was added via syringe and the reaction mixture was stirred at room temperature for 24 h. After quenched with saturated aqueous ammonium chloride solution, the mixture was extracted with ethyl acetate three times and the combined organic layers were washed with water, brine and dried over anhydrous sodium sulfate. After removal of the solvents *in vacuo*, the residue was purified by column chromatography on silica with ethyl acetate/*n*-hexane (*v/v* = 1/3) as eluent to give **11c** (2.22 g, yield: 74%) as white solids.

<sup>1</sup>H NMR (600 MHz, acetone-*d*<sub>6</sub>)  $\delta$  = 9.96 (s, 2H, NH), 9.38 (s, 1H, NH), 7.50 (dd,  $J_1 = 7.3$ ,  $J_2 = 1.4$  Hz, 2H, phenylene-H), 7.22–7.28 (m, 8H, phenylene/indole-H), 7.06 (d,  $J = 2.3$  Hz, indole-H), 6.78 (dd,  $J_1 = 8.7$ ,  $J_2 = 2.3$  Hz, 2H, indole-H), 6.34 (d,  $J = 2.3$  Hz, 2H, pyrrole-H), 5.94 (d,  $J = 2.8$  Hz, 2H, indole-H) and 3.81 (s, 6H, -O-CH<sub>3</sub>) ppm

<sup>13</sup>C NMR (151 MHz, acetone-*d*<sub>6</sub>)  $\delta$  = 155.22, 139.37, 132.82, 132.75, 132.17, 131.50, 131.44, 130.11, 129.14, 128.91, 127.20, 112.85, 112.73, 110.32, 102.53, 102.34 and 55.85 ppm

HR-APCI-TOF-MS: *m/z* calcd for C<sub>34</sub>H<sub>27</sub>N<sub>3</sub>O<sub>2</sub> *M*<sup>+</sup>: 509.2103; found: 509.2098.

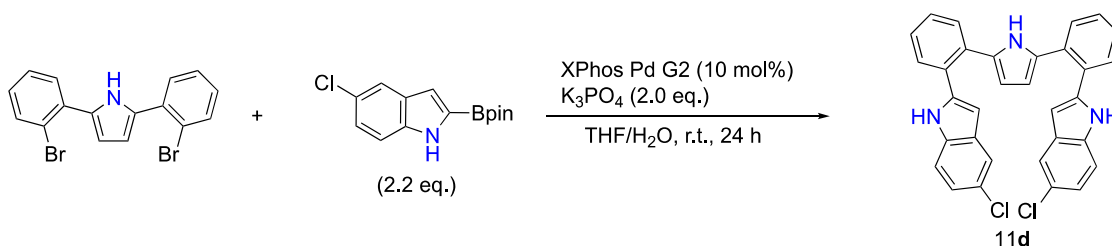

### 2,5-bis(2-(5-chloro-1H-indol-2-yl)phenyl)-1H-pyrrole (**11d**)

To a 300 mL three-necked round bottom flask, XPhos Pd G2 (244 mg, 0.31 mmol, 10 mol%), 2,5-bis(2-bromophenyl)-1H-pyrrole (1.17 g, 3.1 mmol) and 5-chloro-2-(4,4,5,5-tetramethyl-1,3,2-dioxaborolan-2-yl)-1H-indole (1.89 g, 6.8 mmol, 2.2 eq.) were charged. The reaction flask was evacuated and purged with argon three times. After the mixture was dissolved in dry THF (50 mL), degassed 0.5 M aqueous tripotassium phosphate solution (50 mL) was added via syringe and the reaction mixture was stirred at room temperature for 24 h. After quenched with saturated aqueous ammonium chloride solution, the mixture was extracted with ethyl acetate three times and the combined organic layers were washed with water, brine and dried over anhydrous sodium sulfate. After removal of the solvents *in vacuo*, the residue was purified by column chromatography on silica with dichloromethane/*n*-hexane (*v/v* = 1/1) as eluent to give **11d**. **11d** were used without further purification.

<sup>1</sup>H NMR (600 MHz, acetone-*d*<sub>6</sub>)  $\delta$  = 10.31 (s, 2H, NH), 9.55 (s, 1H, NH), 7.51-7.56 (m, 4H, phenylene/indole-H), 7.38 (d, *J* = 8.7 Hz, 2H, indole-H), 7.26–7.34 (m, 6H, phenylene-H), 7.10 (dd, *J*<sub>1</sub> = 8.7, *J*<sub>2</sub> = 1.8 Hz, 2H, indole-H), 6.39 (d, *J* = 2.3 Hz, 2H, pyrrole-H) and 5.89 (d, *J* = 2.3 Hz, 2H, indole-H) ppm

<sup>13</sup>C NMR (151 MHz, acetone-*d*<sub>6</sub>)  $\delta$  = 140.67, 136.05, 132.95, 132.11, 131.51, 130.99, 130.79, 129.48, 129.25, 127.45, 125.48, 122.39, 120.20, 113.40, 110.52 and 102.13 ppm

HR-APCI-TOF-MS: *m/z* calcd for C<sub>32</sub>H<sub>21</sub>N<sub>3</sub><sup>35</sup>Cl<sub>2</sub> *M*<sup>+</sup>: 517.1082; found: 517.1107.

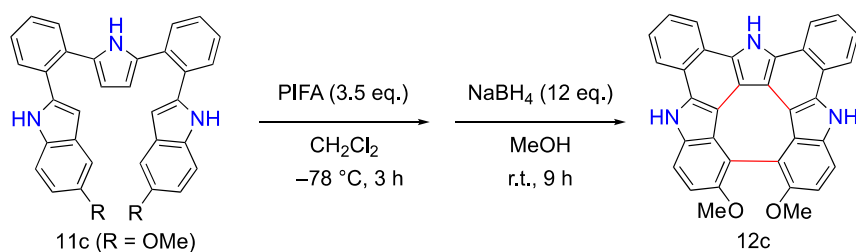

### dimethoxy-substituted dibenzotriaza-*quasi*-[8]circulene **12c**

To a 300 mL three-necked round bottom flask were charged **11c** (583 mg, 1.1 mmol) and dry dichloromethane (85 mL) under argon, which was cooled to  $-78$  °C. Bis(trifluoroacetoxy)iodobenzene (PIFA, 1.72 g, 4.0 mmol, 3.5 eq.) was then added and the reaction mixture was kept at  $-78$  °C for 3 h. Then, the reaction system was allowed to warm to ambient temperature and stirred for 45 min. Next, sodium borohydride (509 mg, 13 mmol, 12 eq.) and methanol (36 mL) were added and the reaction was stirred for 9 h. The mixture was extracted with dichloromethane three times and the combined organic layers were washed with water, brine and dried over anhydrous sodium sulfate. After removal of the solvent *in vacuo*, the residue was purified by recrystallization with dichloromethane/*n*-hexane to afford **12c** (558 mg, yield: 97%) as green solids.

$^1\text{H NMR}$  (600 MHz,  $\text{DMSO-}d_6$ )  $\delta$  = 12.48 (s, 1H, NH), 11.95 (s, 2H, NH), 8.84 (d,  $J$  = 8.3 Hz, 2H, phenylene-H), 8.59 (d,  $J$  = 8.3 Hz, 2H, phenylene-H), 7.71 (t,  $J$  = 7.6 Hz, 2H, phenylene-H), 7.64 (t,  $J$  = 7.6 Hz, 2H, phenylene-H), 7.59 (d,  $J$  = 8.7 Hz, 2H, indole-H), 7.17 (d,  $J$  = 8.7 Hz, 2H, indole-H) and 3.60 (s, 6H, -O-CH<sub>3</sub>) ppm.

$^{13}\text{C NMR}$  (151 MHz,  $\text{THF-}d_8$ )  $\delta$  = 157.37, 138.23, 133.87, 129.04, 125.43, 124.49, 123.11, 123.01, 122.89, 122.49, 122.20, 120.23, 115.67, 115.25, 113.15, 110.90 and 59.02 ppm

HR-APCI-TOF-MS:  $m/z$  calcd for  $\text{C}_{34}\text{H}_{21}\text{N}_3\text{O}_2$   $M^+$ : 503.1625; found: 503.1628.

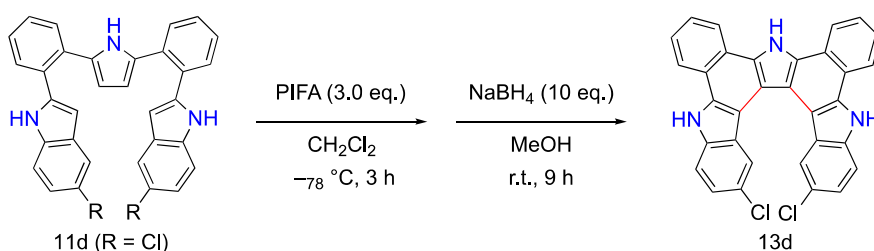

#### dichloro-substituted dibenzotriaza[7]helicene **13d**

To a 200 mL three-necked round bottom flask were charged **11d** (156 mg, 0.30 mmol) and dry dichloromethane (50 mL) under argon, which was cooled to  $-78$  °C. Bis(trifluoroacetoxy)iodobenzene (PIFA, 387 mg, 0.90 mmol, 3.0 eq.) was then added and the reaction mixture was kept at  $-78$  °C for 3 h. Then, the reaction system was allowed to warm to ambient temperature and stirred for 45 min. Next, sodium borohydride (114 mg, 3.0 mmol, 10 eq.) and methanol (10 mL) were added and the reaction was stirred for 9 h. The mixture was extracted with dichloromethane three times and the combined organic layers were washed with water, brine and dried over anhydrous sodium sulfate. After removal of the solvent *in vacuo*, the residue was purified by recrystallization from dichloromethane/*n*-hexane to afford **13d** (147 mg, yield: 95%) as pale yellow solids.

$^1\text{H}$  NMR (600 MHz, acetone- $d_6$ )  $\delta$  = 12.03 (s, 1H, NH), 11.50 (s, 2H, NH), 8.84 (d,  $J$  = 8.3 Hz, 2H, phenylene-H), 8.65 (d,  $J$  = 8.3 Hz, 2H, phenylene-H), 8.10 (d,  $J$  = 2.0 Hz, 2H, indole-H), 7.74 (t,  $J$  = 7.3 Hz, 2H, phenylene-H), 7.70 (t,  $J$  = 7.3 Hz, 2H, phenylene-H), 7.67 (d,  $J$  = 8.7 Hz, 2H, indole-H) and 7.30 (dd,  $J_1$  = 8.7 Hz,  $J_2$  = 2.0 Hz, 2H, indole-H) ppm.

$^{13}\text{C}$  NMR (151 MHz, THF- $d_8$ )  $\delta$  = 138.37, 134.06, 131.44, 126.26, 126.09, 126.03, 125.23, 124.07, 123.89, 123.13, 122.92, 122.76, 122.03, 114.18, 113.79 and 112.17 ppm.

HR-APCI-TOF-MS:  $m/z$  calcd for  $\text{C}_{32}\text{H}_{17}\text{N}_3^{35}\text{Cl}_2$   $M^+$ : 513.0784; found: 513.0794.

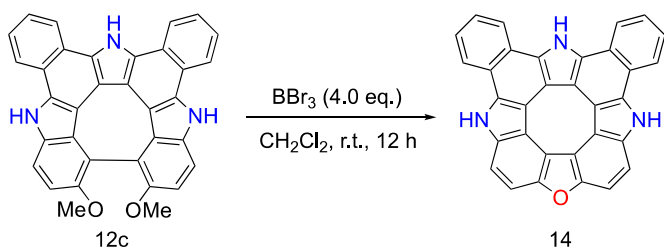

#### dibenzotriaza[8]circulene **14**

To a 1 L four-necked round bottom flask, **12c** (503 mg, 1.0 mmol) was charged. The reaction flask was evacuated and purged with argon three times. After **12c** was dissolved in dry dichloromethane (400 mL), 1.0 M boron tribromide solution in dichloromethane (4.0 mL, 4.0 mmol, 4.0 eq.) was added via syringe and the reaction mixture was stirred at room temperature for 12 h. After quenched with saturated aqueous sodium hydrogen carbonate solution, the mixture was extracted with THF three times and the combined organic layers were washed with water, brine and dried over anhydrous sodium sulfate. After removal of the solvents *in vacuo*, the residue was purified by column chromatography on silica with THF/*n*-hexane (*v/v* = 2/1) as eluent to give **14** (331 mg, yield: 73%) as yellow solids.

$^1\text{H}$  NMR (600 MHz, DMSO- $d_6$ )  $\delta$  = 12.93 (s, 1H, NH), 12.64 (s, 2H, NH), 9.09 (d,  $J$  = 8.3 Hz, 2H, phenylene-H), 8.82 (d,  $J$  = 7.8 Hz, 2H, phenylene-H), 7.98 (d,  $J$  = 8.7 Hz, 2H, indole-H), 7.96 (d,  $J$  = 8.7 Hz, 2H, indole-H), 7.83 (t,  $J$  = 7.6 Hz, 2H, phenylene-H) and 7.77 (t,  $J$  = 7.6 Hz, 2H, phenylene-H) ppm.

$^{13}\text{C}$  NMR (151 MHz, THF- $d_8$ )  $\delta$  = 152.37, 135.60, 133.26, 130.52, 125.52, 124.92, 123.20, 123.10, 122.11, 116.93, 116.34, 113.46, 112.62, 109.97 and 107.94 ppm.

HR-MALDI-TOF-MS:  $m/z$  calcd for  $\text{C}_{32}\text{H}_{15}\text{N}_3\text{O}$   $M^+$ : 457.1210; found: 457.1218.

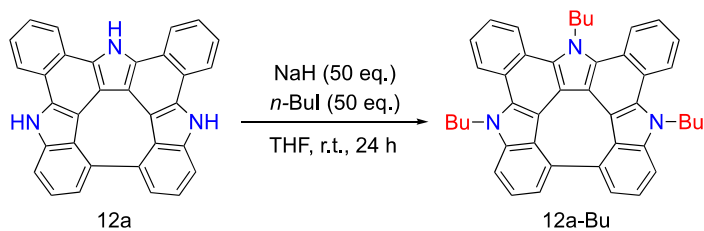

#### tri-*N*-butyl-substituted dibenzotriaza-*quasi*-[8]circulene **12a-Bu**

To a 30 mL Schlenk tube, **12a** (17.7 mg, 0.040 mmol), sodium hydride (80.0 mg, 60% dispersion in mineral oil, 2.0 mmol, 50 eq.) were charged and the mixture was dissolved in dry THF (50 mL) under argon atmosphere. To this solution was added *n*-iodobutane (0.23 mL, 2.0 mmol, 50 eq.) via syringe and the reaction mixture was stirred at room temperature for 24 h. After quenched with saturated aqueous ammonium chloride solution, the mixture was extracted with ethyl acetate three times and the combined organic layers were washed with water, brine and dried over anhydrous sodium sulfate. After removal of the solvents *in vacuo*, the residue was purified by column chromatography on silica with ethyl acetate/*n*-hexane (*v/v* = 1/10) as eluent to give **12a-Bu** (10.5 mg, yield: 43%) as yellow solids.

$^1\text{H-NMR}$  (600 MHz,  $\text{DMSO-}d_6$ )  $\delta$  = 8.72 (d,  $J$  = 8.3 Hz, 2H, phenylene-H), 8.70 (d,  $J$  = 8.3 Hz, 2H, phenylene-H), 7.93 (dd,  $J_1$  = 6.9,  $J_2$  = 2.3 Hz, 2H, indole-H), 7.79 (t,  $J$  = 7.0 Hz, 2H, phenylene-H), 7.74 (t,  $J$  = 7.0 Hz, 2H, phenylene-H), 7.57–7.62 (m, 4H, indole-H), 5.22 (t,  $J$  = 7.3 Hz, 2H, N- $\text{CH}_2$ -), 4.92 (t,  $J$  = 7.8 Hz, 4H, N- $\text{CH}_2$ -), 2.05 (m, 4H,  $-\text{CH}_2\text{-CH}_2\text{-CH}_2-$ ), 1.53 (tq,  $J$  = 14.9 Hz, 4H,  $-\text{CH}_2\text{-CH}_2\text{-CH}_3$ ), 1.41–1.46 (m, 2H,  $-\text{CH}_2\text{-CH}_2\text{-CH}_2-$ ), 1.00 (t,  $J$  = 7.3 Hz, 6H,  $-\text{CH}_3$ ), 0.65–0.70 (tq,  $J$  = 14.9, 2H,  $-\text{CH}_2\text{-CH}_2\text{-CH}_3$ ) and 0.45 (t,  $J$  = 7.3 Hz, 3H,  $-\text{CH}_3$ ) ppm.

$^{13}\text{C NMR}$  (151 MHz,  $\text{CDCl}_3$ )  $\delta$  = 141.70, 136.49, 134.24, 133.34, 127.22, 124.61, 124.02, 123.96, 123.80, 123.71, 123.52, 121.63, 119.71, 117.90, 113.97, 108.85, 52.56, 46.83, 32.53, 31.18, 20.56, 19.94, 14.12 and 13.68 ppm.

HR-APCI-TOF-MS:  $m/z$  calcd for  $\text{C}_{44}\text{H}_{41}\text{N}_3$   $M^+$ : 611.3281; found: 611.3295.



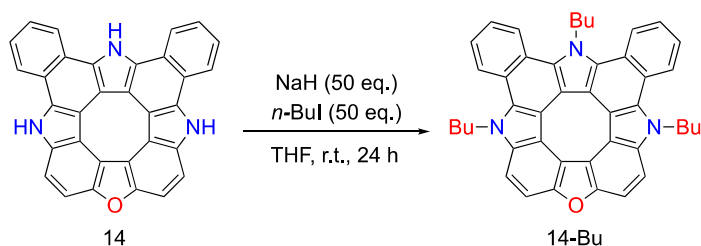

**tri-*N*-butyl-substituted dibenzotriazaoxa[8]circulene 14-Bu**

To a 200 mL three-necked round bottom flask, **14** (45.8 mg, 0.10 mmol), sodium hydride (200 mg, 60% dispersion in mineral oil, 5.0 mmol, 50 eq.) were charged and the mixture was dissolved in dry THF (60 mL) under argon atmosphere. To the mixture was added *n*-iodobutane (0.57 mL, 5.0 mmol, 50 eq.) via syringe and the reaction mixture was stirred at room temperature for 24 h. After quenched with saturated aqueous ammonium chloride solution, the mixture was extracted with ethyl acetate three times and the combined organic layers were washed with water, brine and dried over anhydrous sodium sulfate. After removal of the solvents *in vacuo*, the residue was purified by recrystallization from dichloromethane/*n*-hexane to give **14-Bu** (48.7 mg, yield: 78%) as yellow solids.

$^1\text{H}$  NMR (600 MHz,  $\text{CDCl}_3$ )  $\delta$  = 8.80 (d,  $J$  = 8.3 Hz, 2H, phenylene-H), 8.74 (d,  $J$  = 8.3 Hz, 2H, phenylene-H), 7.86 (d,  $J$  = 8.7 Hz, 2H, indole-H), 7.76 (d,  $J$  = 8.7 Hz, 2H, indole-H), 7.67–7.73 (m, 4H, phenylene-H), 5.21 (t,  $J$  = 7.3 Hz, 2H, N- $\text{CH}_2$ -), 5.00 (t,  $J$  = 7.8 Hz, 4H, N- $\text{CH}_2$ -), 2.23–2.28 (m, 4H,  $-\text{CH}_2-\text{CH}_2-\text{CH}_2-$ ), 1.67 (tq,  $J$  = 14.9 Hz, 4H,  $-\text{CH}_2-\text{CH}_2-\text{CH}_3$ ), 1.14–1.22 (m, 2H,  $-\text{CH}_2-\text{CH}_2-\text{CH}_2-$ ), 1.11 (t,  $J$  = 7.3 Hz, 6H,  $-\text{CH}_3$ ), 0.67 (tq,  $J_1$  = 14.9 Hz, 2H,  $-\text{CH}_2-\text{CH}_2-\text{CH}_3$ ) and 0.39 (t,  $J$  = 7.3 Hz, 3H,  $-\text{CH}_3$ ) ppm.

$^{13}\text{C}$  NMR (151 MHz,  $\text{CDCl}_3$ )  $\delta$  = 151.39, 137.45, 136.45, 132.56, 124.79, 124.21, 124.10, 123.88, 123.17, 121.94, 117.29, 116.10, 114.39, 112.86, 107.85, 107.47, 54.31, 46.84, 32.48, 30.61, 20.55, 19.94, 14.12 and 13.51 ppm.

HR-APCI-TOF-MS:  $m/z$  calcd for  $\text{C}_{44}\text{H}_{39}\text{N}_3\text{O}$   $M^+$ : 625.3070; found: 625.3088.

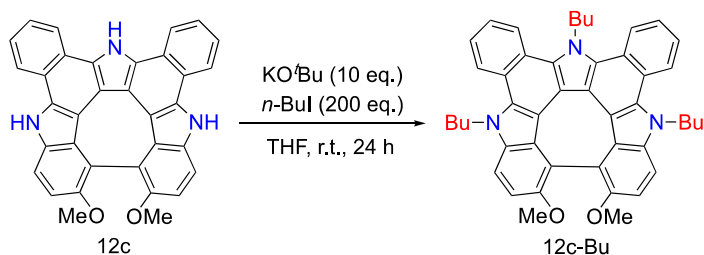

**tri-*N*-butyl-dimethoxy-substituted dibenzotriaza-*quasi*-[8]circulene 12c-Bu**

To a 200 mL three-necked round bottom flask, **12c** (50.3 mg, 0.10 mmol) was charged and dissolved in dry THF (60 mL) under argon atmosphere. To the mixture was added *n*-iodobutane (2.3 mL, 20 mmol, 200 eq.) and 1 M potassium *tert*-butoxide in THF (1.0 mL, 1.0 mmol, 10 eq.) via syringe and the reaction mixture was stirred at room temperature for 24 h. After quenched with saturated aqueous ammonium chloride solution, the mixture was extracted with ethyl acetate three times and the combined organic layers were washed with water, brine and dried over anhydrous sodium sulfate. After removal of the solvents *in vacuo*, the residue was purified by column chromatography on silica with ethyl acetate/*n*-hexane (*v/v* = 1/4) as eluent to give **12c-Bu** (30.7 mg, yield: 46%) as yellow solids.

$^1\text{H}$  NMR (600 MHz,  $\text{DMSO-}d_6$ )  $\delta$  = 8.64 (t,  $J$  = 9.2 Hz, 4H, phenylene-H), 7.69–7.76 (m, 6H, phenylene/indole-H), 7.25 (d,  $J$  = 8.7 Hz, 2H, indole-H), 5.22 (m, 1H, N- $\text{CH}_2$ -), 5.10 (m, 1H, N- $\text{CH}_2$ -), 4.73–4.84 (m, 4H, N- $\text{CH}_2$ -), 1.93–2.02 (m, 4H,  $-\text{CH}_2\text{-CH}_2\text{-CH}_2-$ ), 1.43–1.62 (m, 6H,  $-\text{CH}_2\text{-CH}_2\text{-CH}_2\text{-}/-\text{CH}_2\text{-CH}_2\text{-CH}_3$ ), 0.98 (t,  $J$  = 7.3 Hz, 6H,  $-\text{CH}_3$ ), 0.79 (tq,  $J$  = 14.9 Hz, 2H,  $-\text{CH}_2\text{-CH}_2\text{-CH}_3$ ) and 0.53 (t,  $J$  = 7.3 Hz, 3H,  $-\text{CH}_3$ ) ppm.

$^{13}\text{C}$  NMR (151 MHz,  $\text{CDCl}_3$ )  $\delta$  = 156.01, 138.38, 134.32, 132.81, 124.56, 124.02, 123.79, 123.60, 121.93, 121.18, 119.41, 117.77, 114.70, 112.87, 108.84, 59.28, 51.67, 46.86, 32.74, 31.37, 20.59, 19.97, 14.13 and 13.75 ppm.

HR-APCI-TOF-MS:  $m/z$  calcd for  $\text{C}_{46}\text{H}_{45}\text{N}_3\text{O}_2$   $M^+$ : 671.3497; found: 671.3506.

### 3. NMR Spectra

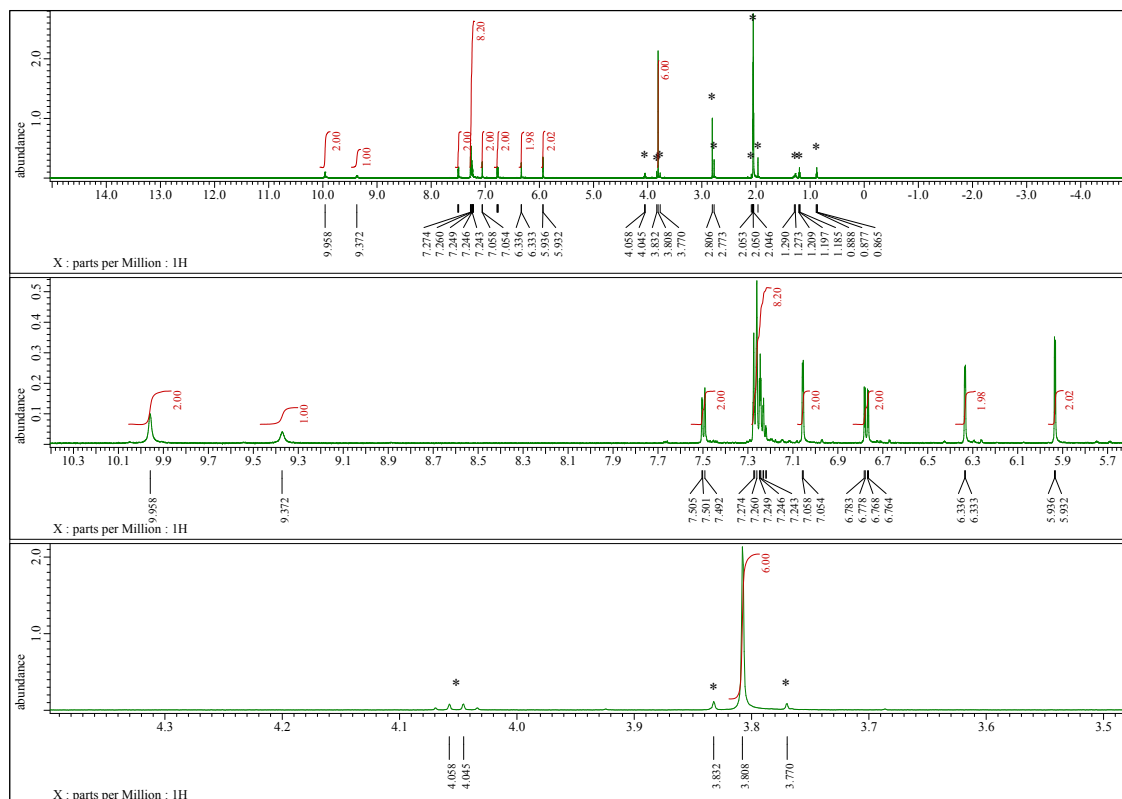

**Figure S3-1.**  $^1\text{H}$  NMR spectrum of **11c** in acetone- $d_6$  at room temperature. Peaks with \* are due to residual solvents and impurities.

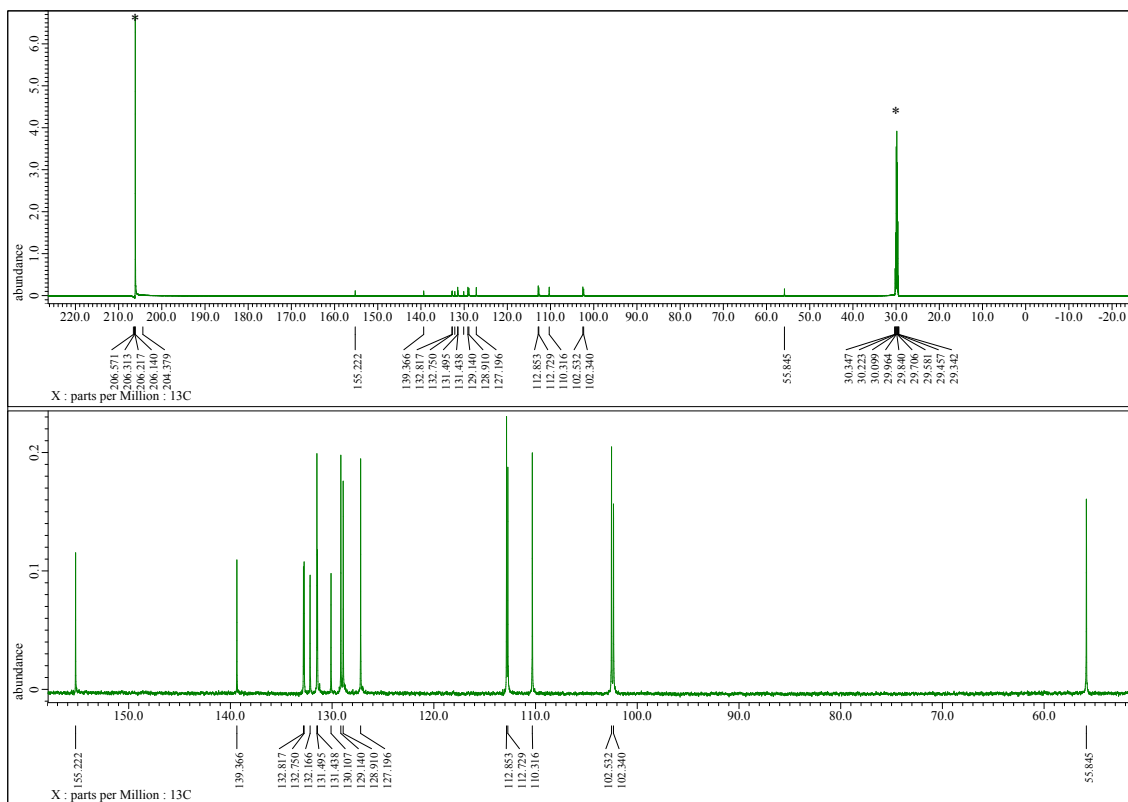

**Figure S3-2.**  $^{13}\text{C}$  NMR spectrum of **11c** in acetone- $d_6$  at room temperature. Peaks with \* are due to residual solvent.

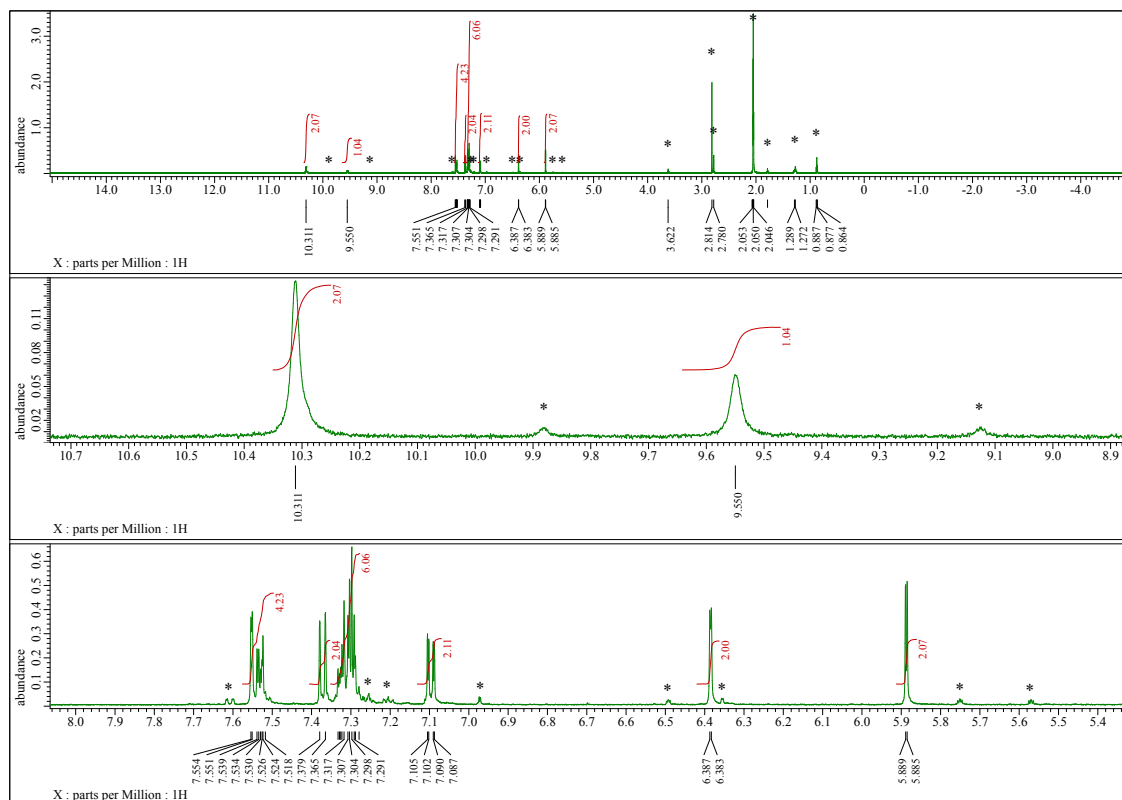

**Figure S3-3.**  $^1\text{H}$  NMR spectrum of **11d** in acetone- $d_6$  at room temperature. Peaks with \* are due to residual solvents and impurities.

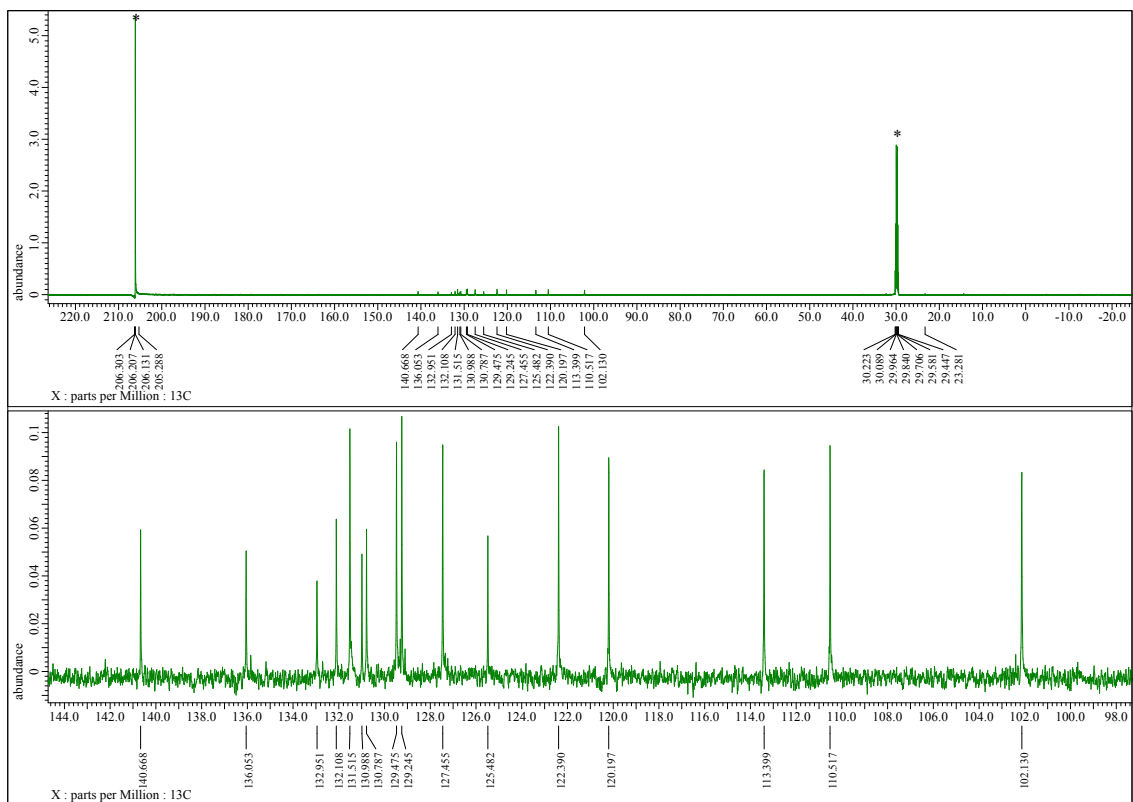

**Figure S3-4.**  $^{13}\text{C}$  NMR spectrum of **11d** in acetone- $d_6$  at room temperature. Peaks with \* are due to residual solvent.

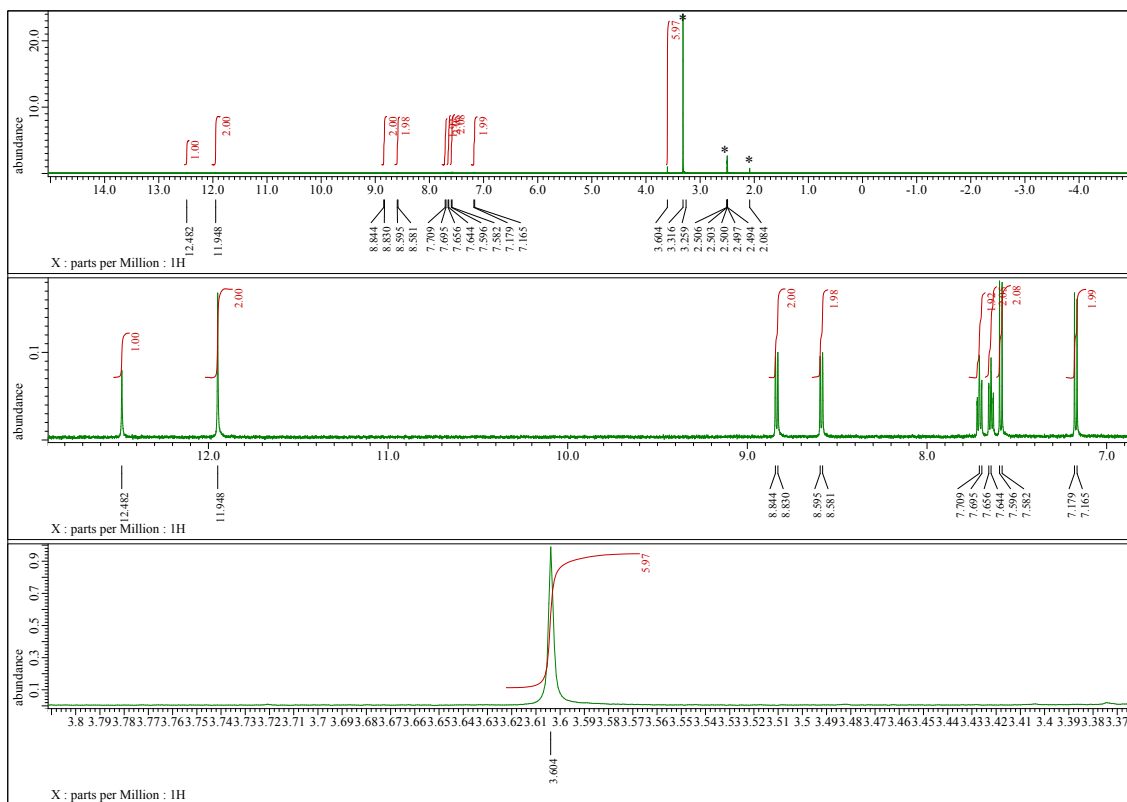

**Figure S3-5.** <sup>1</sup>H NMR spectrum of **12c** in DMSO-*d*<sub>6</sub> at room temperature. Peaks with \* are due to residual solvents and impurities.

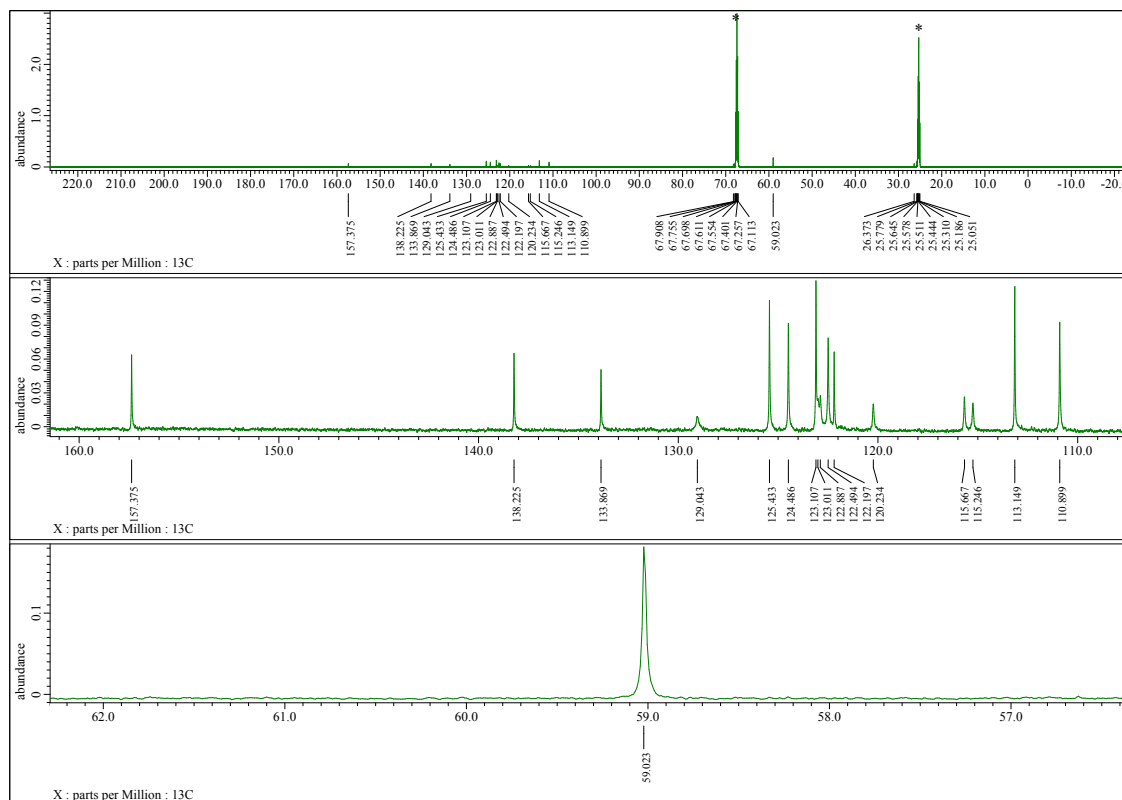

**Figure S3-6.**  $^{13}\text{C}$  NMR spectrum of **12c** in  $\text{THF-}d_8$  at room temperature. Peaks with \* are due to residual solvent.



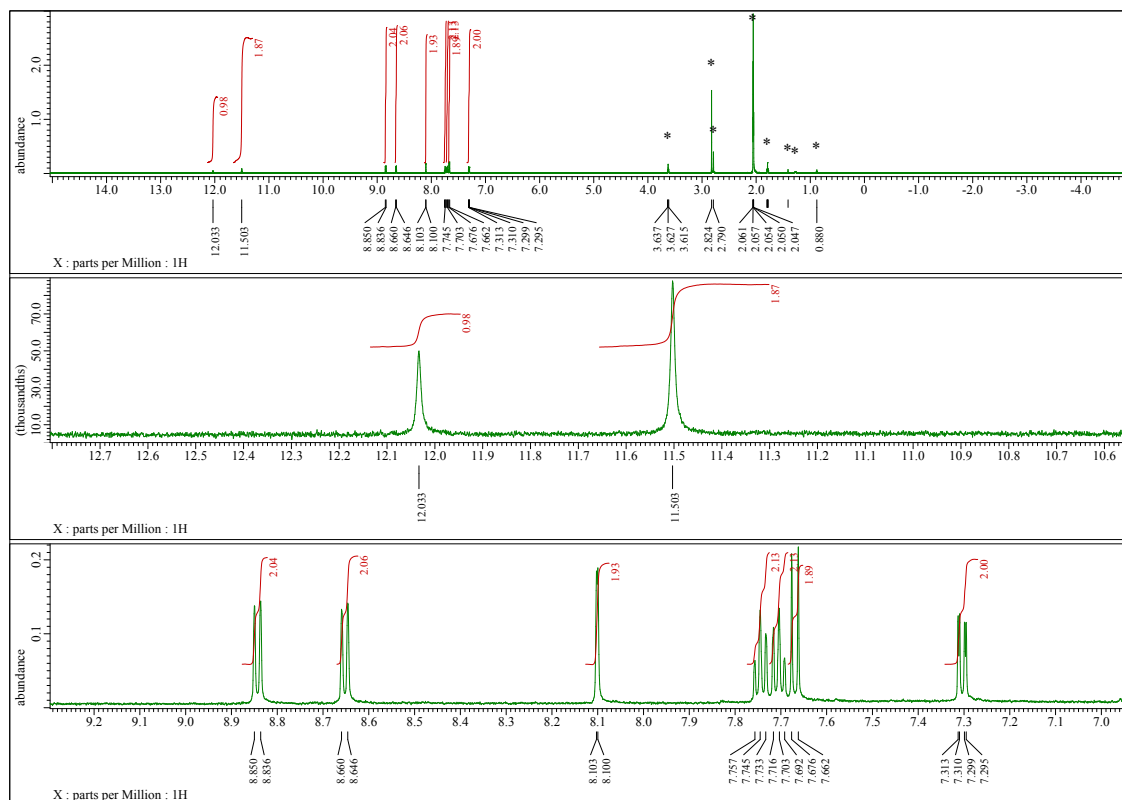

**Figure S3-7.**  $^1\text{H}$  NMR spectra of **13d** in acetone- $d_6$  at room temperatures. Peaks with \* are due to residual solvents and impurities.

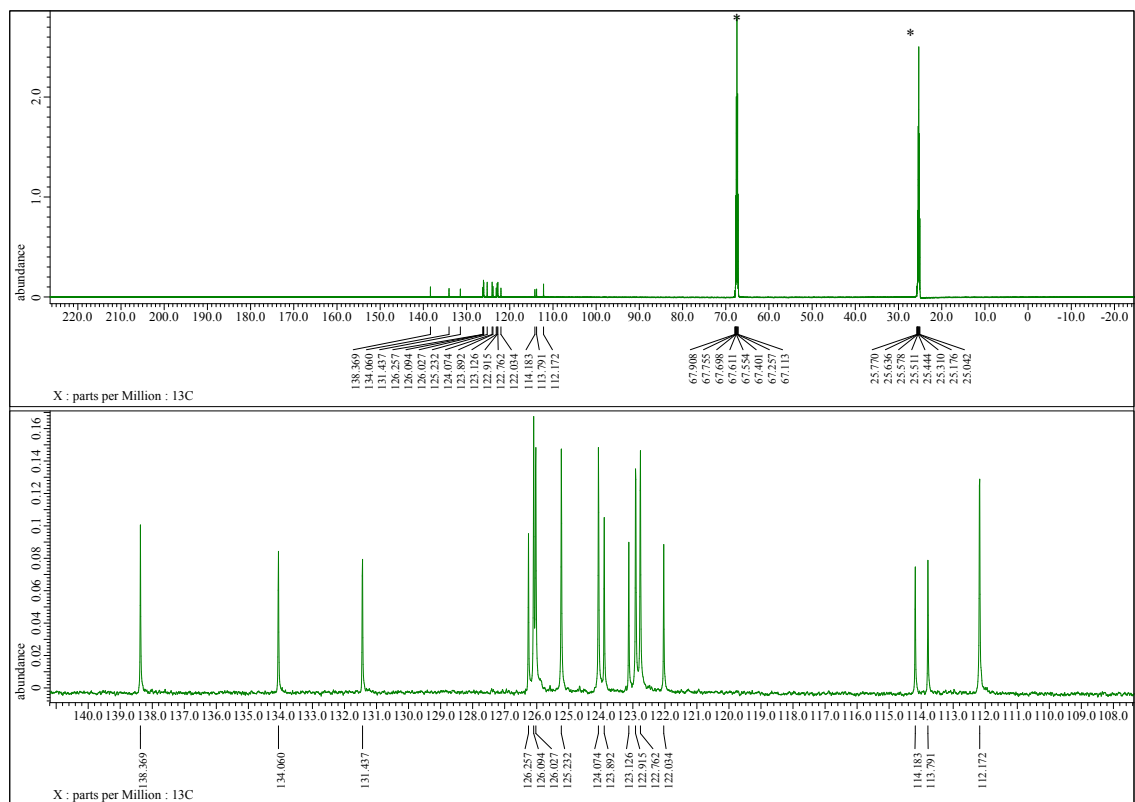

**Figure S3-8.**  $^{13}\text{C}$  NMR spectrum of **13d** in  $\text{THF-}d_8$  at room temperature. Peaks with \* are due to residual solvents.

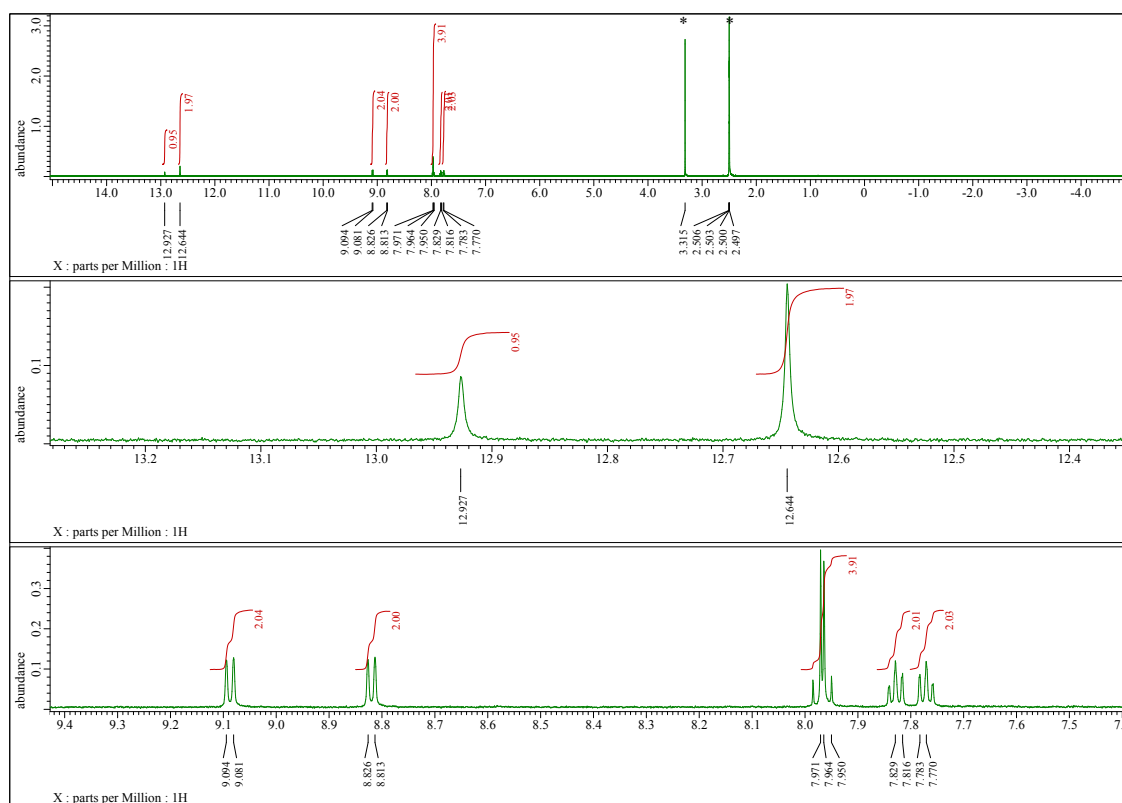

**Figure S3-9.**  $^1\text{H}$  NMR spectrum of **14** in  $\text{DMSO-}d_6$  at room temperature. Peaks with \* are due to residual solvents.

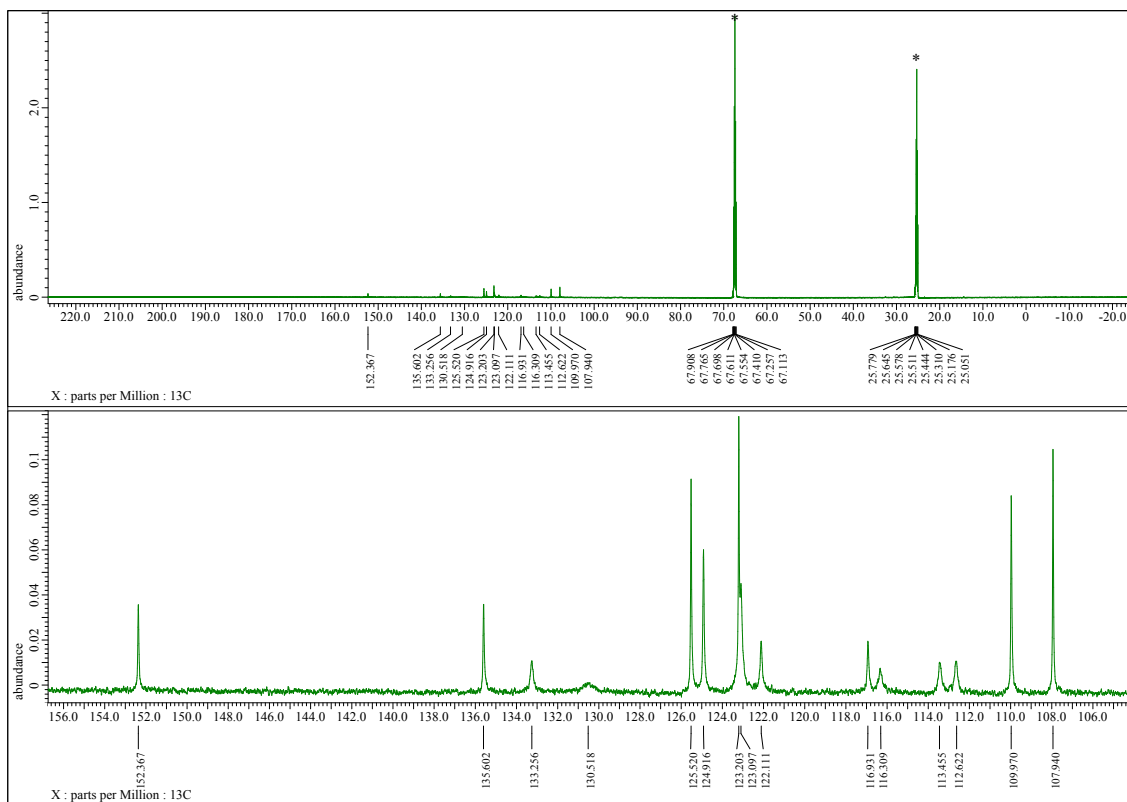

**Figure S3-10.**  $^{13}\text{C}$  NMR spectra of **14** in  $\text{THF-}d_8$  at room temperatures. Peaks with \* are due to residual solvents.

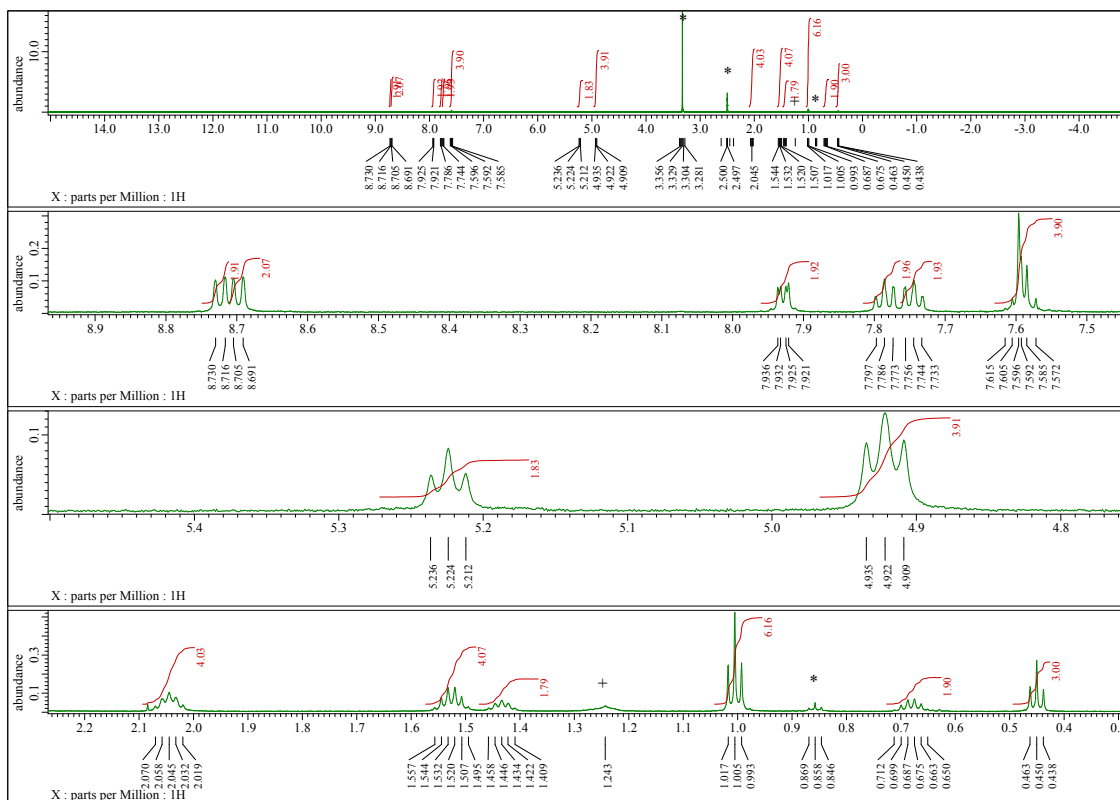

**Figure S3-11.**  $^1\text{H}$  NMR spectrum of **12a-Bu** in  $\text{DMSO-}d_6$  at room temperature. Peaks with \* are due to residual solvents and impurities.

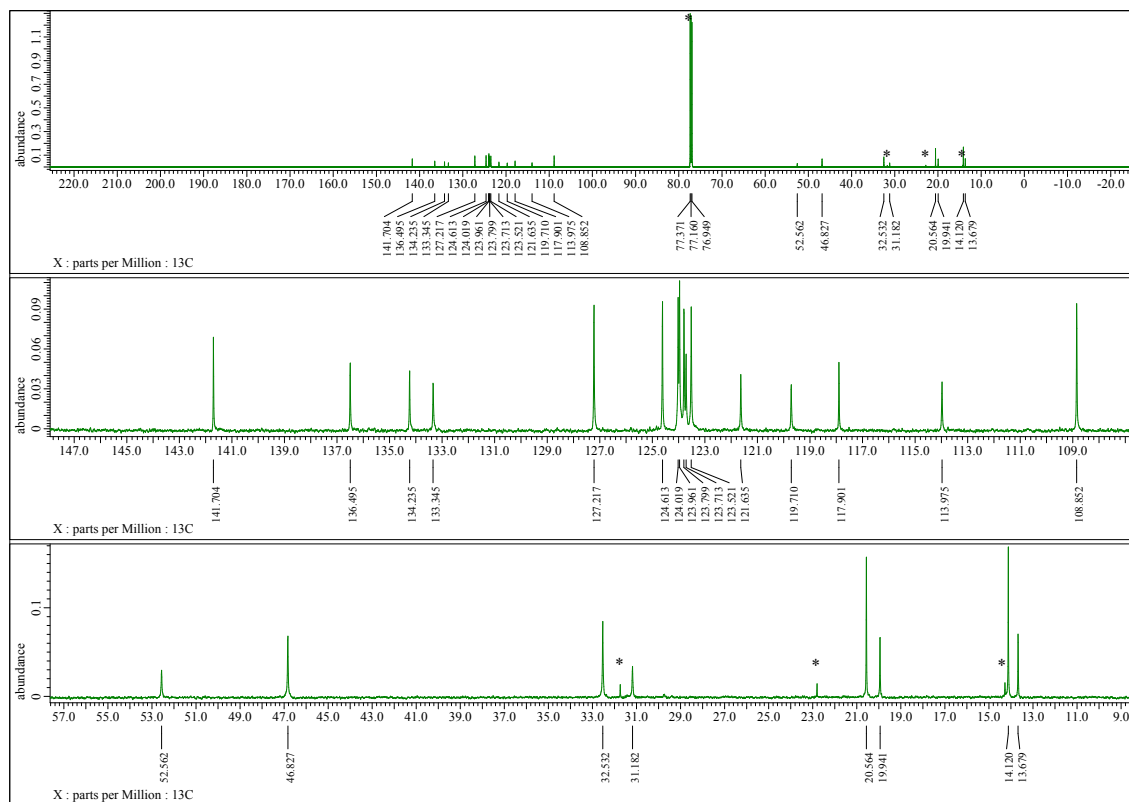

**Figure S3-12.**  $^{13}\text{C}$  NMR spectrum of **12a-Bu** in  $\text{CDCl}_3$  at room temperature. Peaks with \* are due to residual solvents.

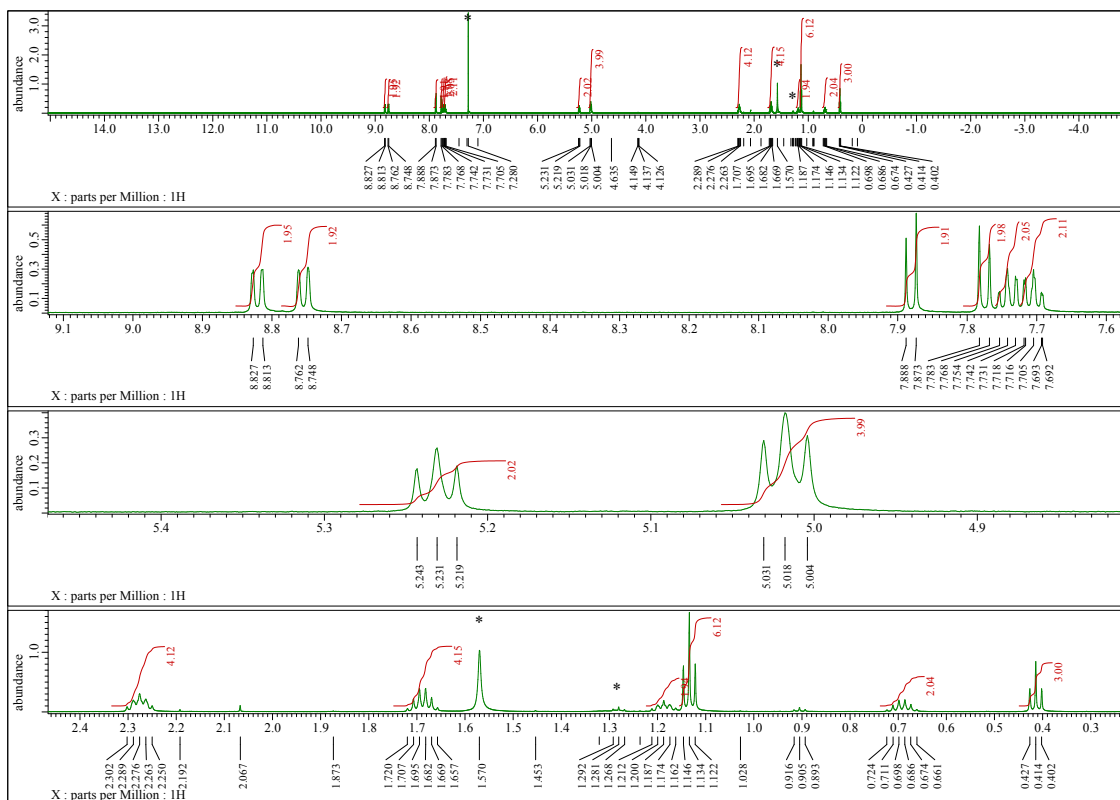

**Figure S3-13.** <sup>1</sup>H NMR spectrum of **14-Bu** in CDCl<sub>3</sub> at room temperature. Peaks with \* are due to residual solvents and impurities.

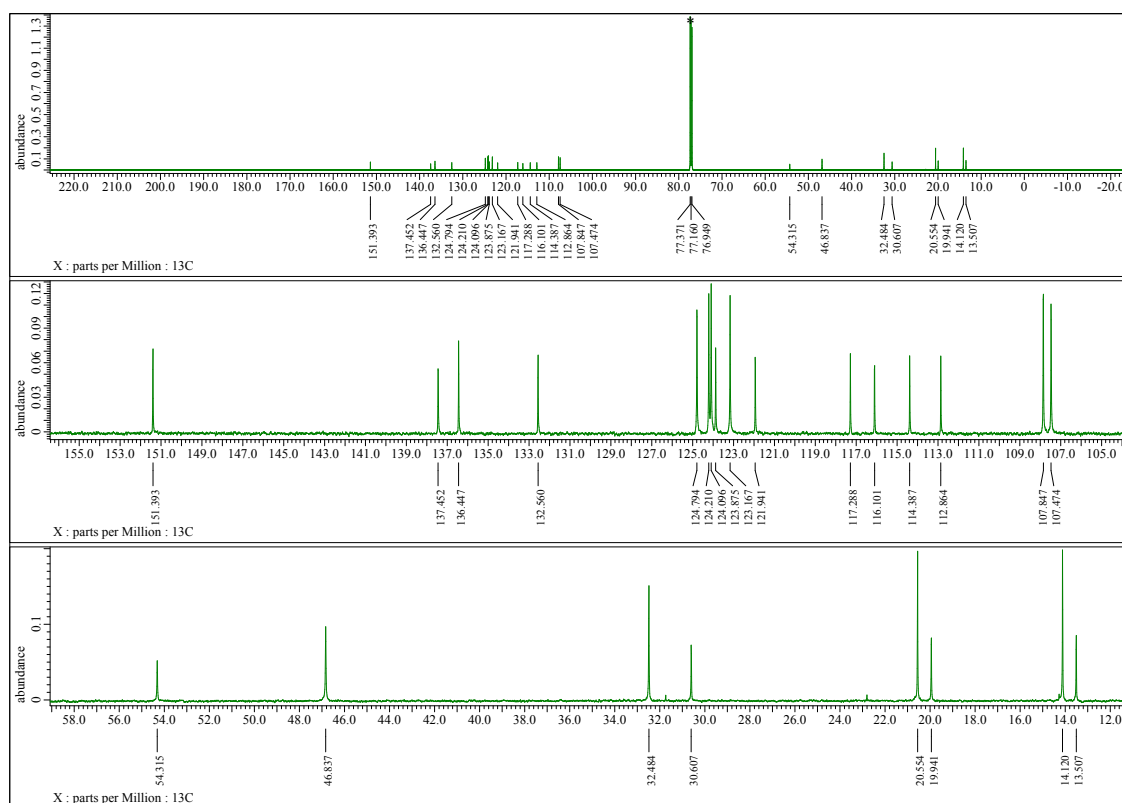

**Figure S3-14.**  $^{13}\text{C}$  NMR spectra of **14-Bu** in  $\text{CDCl}_3$  at room temperature. Peak with \* are due to residual solvent.



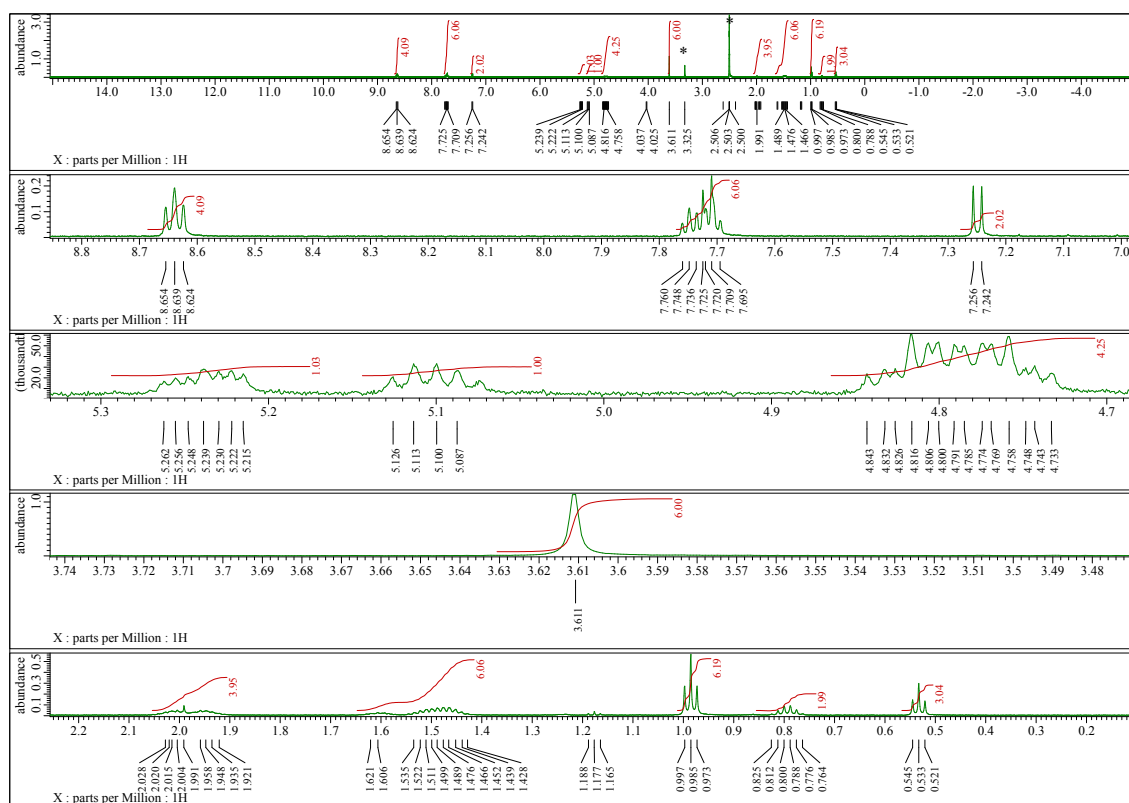

**Figure S3-15.** <sup>1</sup>H NMR spectrum of 12c-Bu in DMSO-d<sub>6</sub> at room temperature. Peaks with \* are due to residual solvents and impurities.

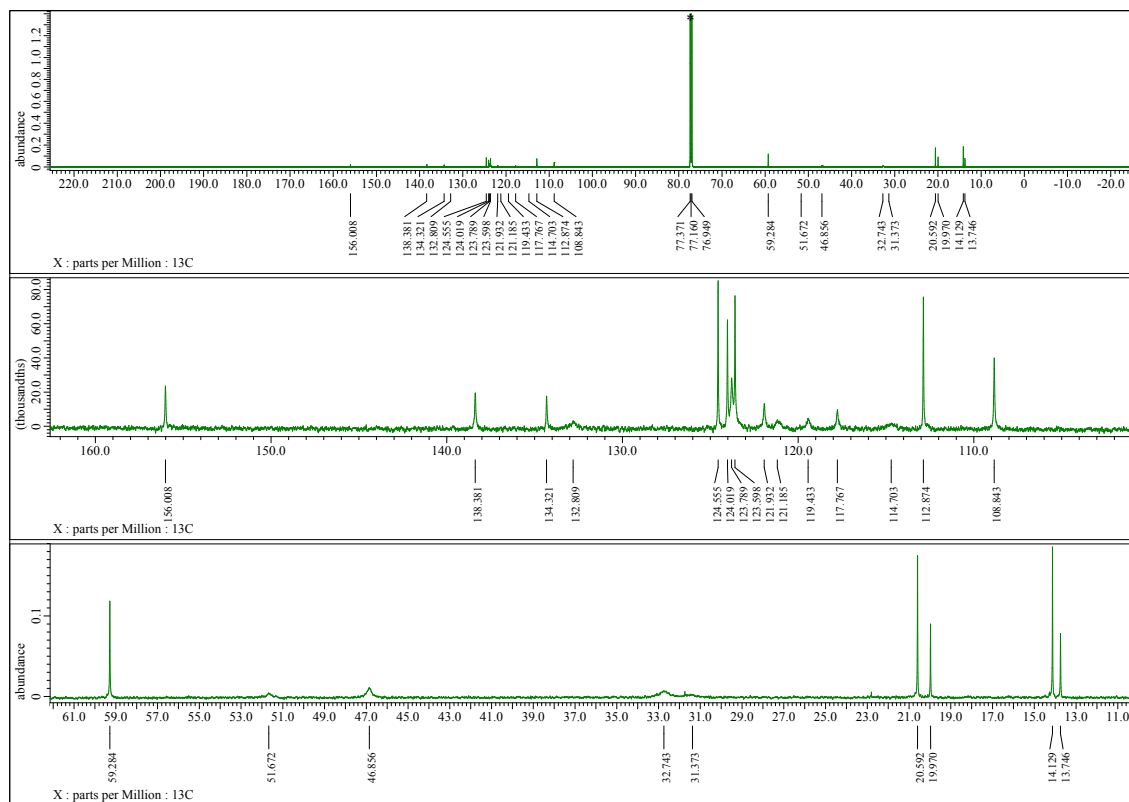

**Figure S3-16.**  $^{13}\text{C}$  NMR spectrum of **12c-Bu** in  $\text{CDCl}_3$  at room temperature. Peak with \* are due to residual solvent.

#### 4. Mass Spectra

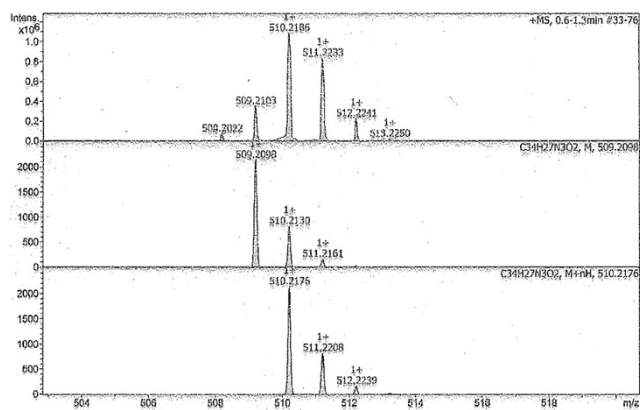

Figure S4-1. APCI-TOF-mass spectra of **11c** (Top; observed. Bottom; calculated).

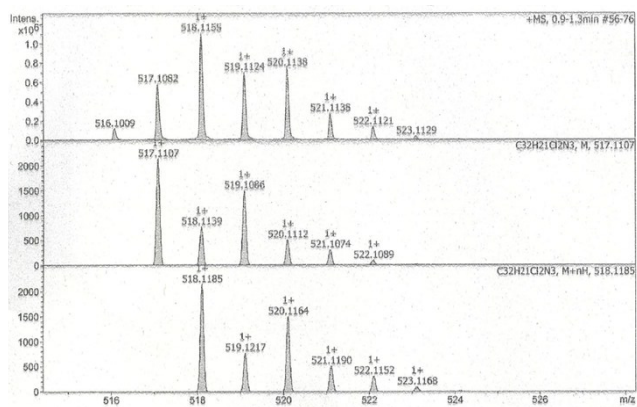

Figure S4-2. APCI-TOF-mass spectra of **11d** (Top; observed. Bottom; calculated).

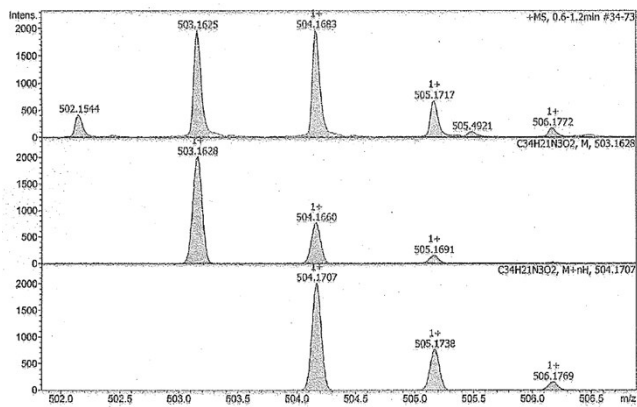

**Figure S4-3.** APCI-TOF-mass spectra of **12c** (Top; observed. Bottom; calculated).

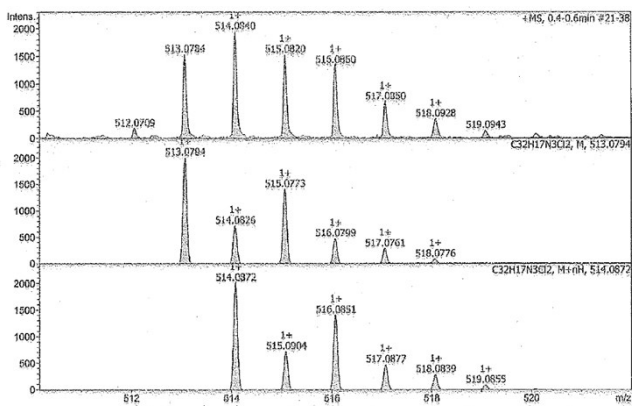

**Figure S4-4.** APCI-TOF-mass spectra of **13d** (Top; observed. Middle; simulated as  $[M]^+$ , Bottom; simulated as  $[M+H]^+$ ).

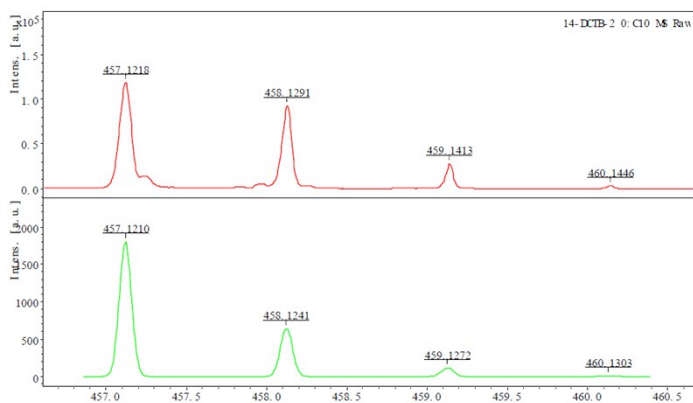

**Figure S4-5.** HR-MALDI-TOF-mass spectra of **14** (Top; observed. Bottom; simulated).

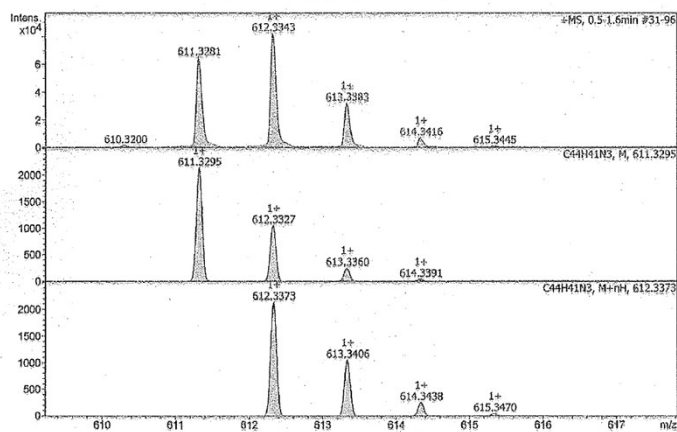

**Figure S4-6.** APCI-TOF-mass spectra of **12a-Bu** (Top; observed. Middle; simulated as  $[M]^+$ , Bottom; simulated as  $[M+H]^+$ ).

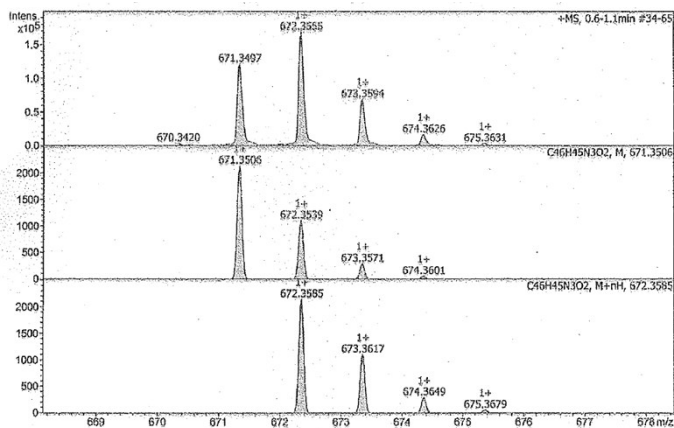

**Figure S4-7.** APCI-TOF-mass spectra of **12c-Bu** (Top; observed. Middle; simulated as  $[M]^+$ , Bottom; simulated as  $[M+H]^+$ ).

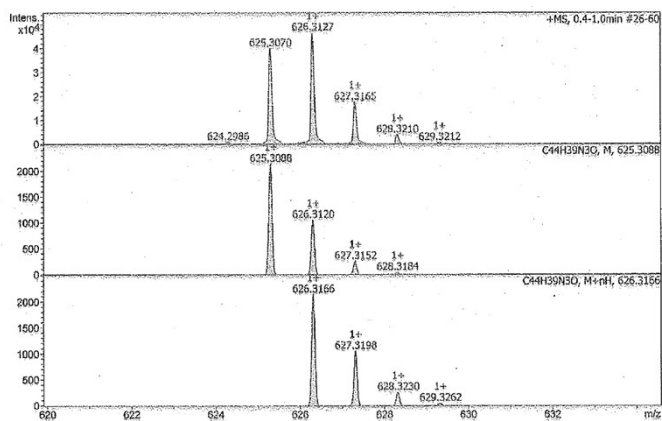

**Figure S4-8.** APCI-TOF-mass spectra of **14-Bu** (Top; observed. Middle; simulated as  $[M]^+$ , Bottom; simulated as  $[M+H]^+$ ).

\*For **11c**, **11d**, **12c**, **13d**, **12a-Bu**, **12c-Bu** and **14-Bu**, the observed mass peaks were likely considered to be a mixture of  $[M]$  and  $[M+H]$ .



## 5. DFT Calculations

All calculations were carried out using the Gaussian 16 program. All structures were fully optimized without any symmetry restriction. The calculations were performed by the density functional theory (DFT) method with restricted B3LYP level<sup>[S5]</sup>, employing a basis set 6-311G(d,p) for all atoms. Spin density distributions have been calculated at the UB3LYP/6-311G(d,p) level. NICS<sup>[S6]</sup> values have been obtained with the GIAO method at the B3LYP/6-311G(d,p) level. Excitation energies and oscillator strengths were calculated with the TD-SCF method at the B3LYP level.

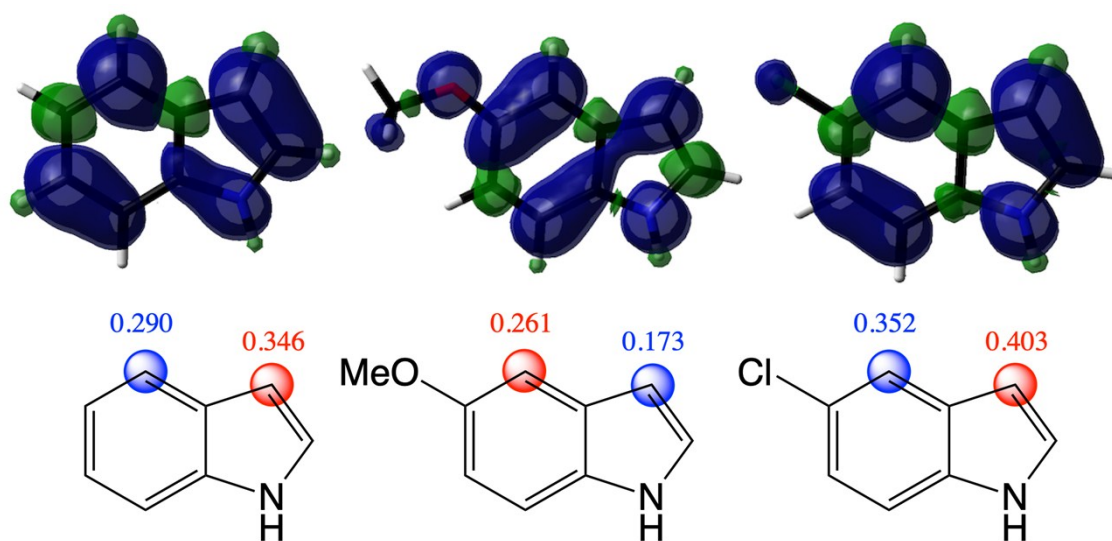

**Figure 5-1.** Spin density distribution of the radical cations of 1*H*-indole, 5-methoxy-1*H*-indole and 5-chloro-1*H*-indole calculated at the UB3LYP/6-311G(d,p) level.



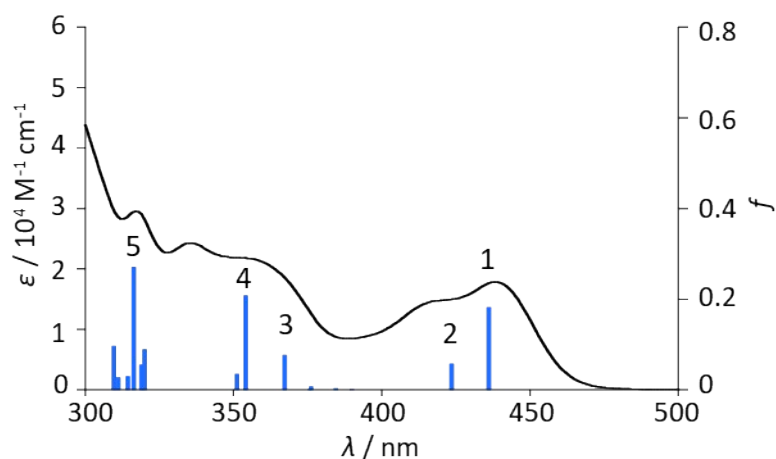

**Figure S5-2.** Experimental molar absorption in THF and calculated oscillator strengths  $f$  on the basis of optimized structure of **12c**.

**Table S5-1.** Selected calculated electronic transition of **12c** at the B3LYP/6-311G(d,p) level.

| No. | Wavelength (nm) | coefficients                                | Electronic Transition                                                                                                                                | $f$    |
|-----|-----------------|---------------------------------------------|------------------------------------------------------------------------------------------------------------------------------------------------------|--------|
| 1   | 436.13          | 0.69255                                     | 131 HOMO $\rightarrow$ 132 LUMO                                                                                                                      | 0.1816 |
| 2   | 423.65          | -0.12399<br>0.68703                         | 129 HOMO-2 $\rightarrow$ 134 LUMO+2<br>130 HOMO-1 $\rightarrow$ 132 LUMO                                                                             | 0.0568 |
| 3   | 376.15          | 0.12335<br>0.53834<br>0.42423               | 128 HOMO-3 $\rightarrow$ 132 LUMO<br>130 HOMO-1 $\rightarrow$ 133 LUMO+1<br>131 HOMO $\rightarrow$ 134 LUMO+2                                        | 0.0065 |
| 4   | 354.13          | 0.67397<br>-0.13094                         | 128 HOMO-3 $\rightarrow$ 132 LUMO<br>131 HOMO $\rightarrow$ 134 LUMO+2                                                                               | 0.2073 |
| 5   | 316.44          | -0.16005<br>-0.40783<br>0.52152<br>-0.10859 | 127 HOMO-4 $\rightarrow$ 132 LUMO<br>128 HOMO-3 $\rightarrow$ 134 LUMO+2<br>129 HOMO-2 $\rightarrow$ 133 LUMO+1<br>131 HOMO $\rightarrow$ 135 LUMO+3 | 0.2708 |

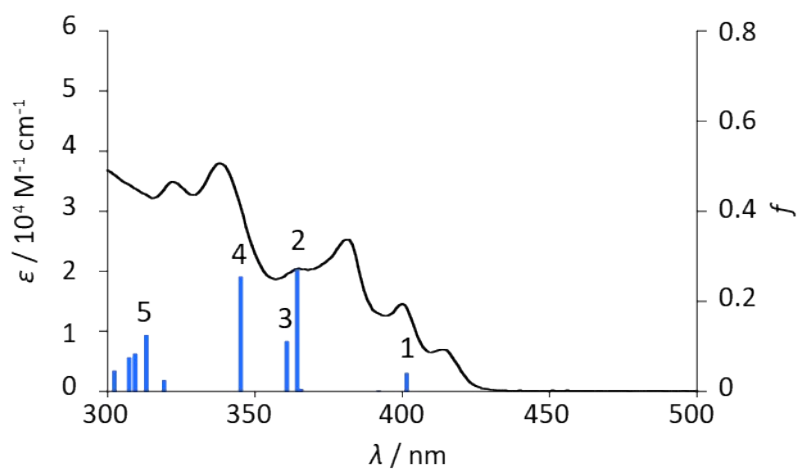

**Figure S5-3.** Experimental molar absorption in THF and calculated oscillator strengths  $f$  on the basis of optimized structure of **13d**.

**Table S5-2.** Selected calculated electronic transition of **13d** at the B3LYP/6-311G(d,p) level.

| No. | Wavelength (nm) | coefficients                                | Electronic Transition                                                                                                                              | $f$    |
|-----|-----------------|---------------------------------------------|----------------------------------------------------------------------------------------------------------------------------------------------------|--------|
| 1   | 401.50          | 0.24013<br>0.64850                          | 131 HOMO-1 $\rightarrow$ 134 LUMO+1<br>132 HOMO $\rightarrow$ 133 LUMO                                                                             | 0.0400 |
| 2   | 364.30          | 0.46514<br>0.40778<br>0.27637               | 131 HOMO-1 $\rightarrow$ 133 LUMO<br>131 HOMO-1 $\rightarrow$ 135 LUMO+2<br>132 HOMO $\rightarrow$ 134 LUMO+1                                      | 0.2690 |
| 3   | 360.88          | -0.10383<br>0.63871<br>-0.24467<br>-0.10674 | 129 HOMO-3 $\rightarrow$ 133 LUMO<br>131 HOMO-1 $\rightarrow$ 134 LUMO+1<br>132 HOMO $\rightarrow$ 133 LUMO<br>132 HOMO $\rightarrow$ 135 LUMO+2   | 0.1113 |
| 4   | 345.28          | -0.20350<br>-0.31823<br>0.53392<br>-0.23005 | 130 HOMO-2 $\rightarrow$ 133 LUMO<br>131 HOMO-1 $\rightarrow$ 133 LUMO<br>131 HOMO-1 $\rightarrow$ 135 LUMO+2<br>132 HOMO $\rightarrow$ 134 LUMO+1 | 0.2541 |
| 5   | 313.20          | 0.66192<br>0.10754<br>0.13145               | 129 HOMO-3 $\rightarrow$ 133 LUMO+1<br>130 HOMO-2 $\rightarrow$ 134 LUMO+2<br>131 HOMO-1 $\rightarrow$ 136 LUMO+4                                  | 0.1244 |

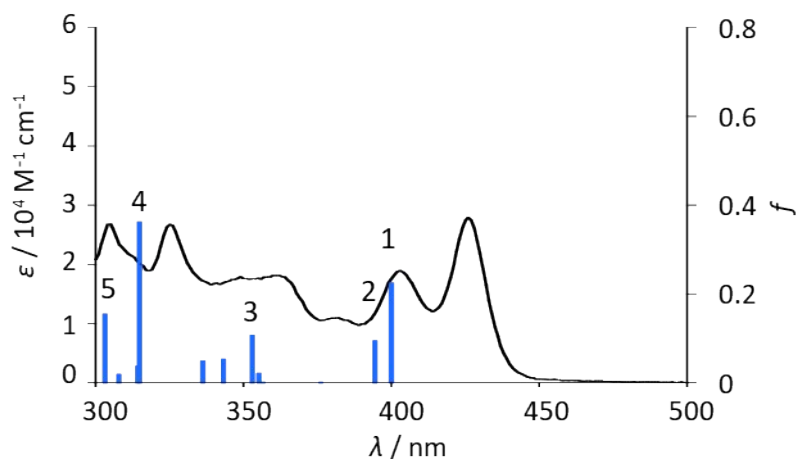

**Figure S5-4.** Experimental molar absorption in THF and calculated oscillator strengths  $f$  on the basis of optimized structure of **14**.

**Table S5-3.** Selected calculated electronic transition of **14** at the B3LYP/6-311G(d,p) level.

| No. | Wavelength (nm) | coefficients                               | Electronic Transition                                                                                                                                | $f$    |
|-----|-----------------|--------------------------------------------|------------------------------------------------------------------------------------------------------------------------------------------------------|--------|
| 1   | 399.95          | 0.13880<br>0.67662                         | 116 HOMO-2 $\rightarrow$ 120 LUMO+1<br>118 HOMO $\rightarrow$ 119 LUMO                                                                               | 0.2254 |
| 2   | 394.49          | 0.15531<br>-0.14463<br>0.66334             | 115 HOMO-3 $\rightarrow$ 119 LUMO<br>116 HOMO-2 $\rightarrow$ 121 LUMO+2<br>117 HOMO-1 $\rightarrow$ 119 LUMO                                        | 0.0948 |
| 3   | 352.92          | 0.51982<br>-0.15151<br>0.42562             | 115 HOMO-3 $\rightarrow$ 119 LUMO<br>117 HOMO-1 $\rightarrow$ 119 LUMO<br>117 HOMO-1 $\rightarrow$ 120 LUMO+1                                        | 0.1079 |
| 4   | 314.83          | 0.44027<br>0.37606<br>-0.15875<br>-0.13933 | 114 HOMO-4 $\rightarrow$ 119 LUMO<br>116 HOMO-2 $\rightarrow$ 120 LUMO+1<br>117 HOMO-1 $\rightarrow$ 121 LUMO+2<br>118 HOMO $\rightarrow$ 119 LUMO   | 0.3625 |
| 5   | 303.17          | 0.63011<br>0.10550<br>0.13167<br>0.22115   | 116 HOMO-2 $\rightarrow$ 121 LUMO+2<br>117 HOMO-1 $\rightarrow$ 119 LUMO<br>117 HOMO-1 $\rightarrow$ 120 LUMO+1<br>118 HOMO $\rightarrow$ 123 LUMO+4 | 0.1552 |

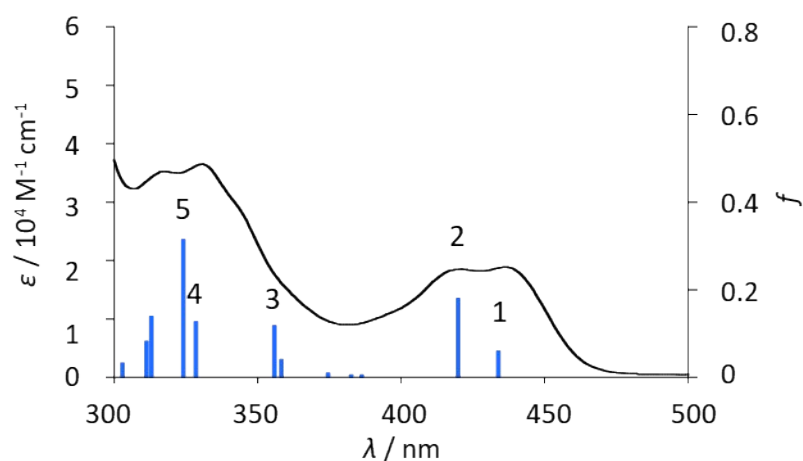

**Figure S5-5.** Experimental molar absorption in THF and calculated oscillator strengths  $f$  on the basis of optimized structure of **12a-Bu**.

**Table S5-4.** Selected calculated electronic transition of **12a-Bu** at the B3LYP/6-311G(d,p) level

| No.      | Wavelength (nm)                   | coefficients | Electronic Transition                | $f$    |
|----------|-----------------------------------|--------------|--------------------------------------|--------|
| 1        | 433.95                            | -0.10001     | 161 HOMO-2 $\rightarrow$ 166 LUMO+2  | 0.0609 |
|          |                                   | -0.11995     | 162 HOMO-1 $\rightarrow$ 164 LUMO    |        |
|          |                                   | 0.68025      | 163 HOMO $\rightarrow$ 164 LUMO      |        |
| 2        | 419.96                            | 0.11086      | 161 HOMO-2 $\rightarrow$ 165 LUMO+1  | 0.1809 |
|          |                                   | 0.67303      | 162 HOMO-1 $\rightarrow$ 164 LUMO    |        |
|          |                                   | 0.11775      | 163 HOMO $\rightarrow$ 164 LUMO      |        |
| 3        | 355.91                            | -0.13304     | 161 HOMO-2 $\rightarrow$ 164 LUMO    | 0.1184 |
|          |                                   | -0.17105     | 161 HOMO-2 $\rightarrow$ 165 LUMO+1  |        |
|          |                                   | -0.38329     | 162 HOMO-1 $\rightarrow$ 165 LUMO+1  |        |
|          |                                   | 0.39344      | 162 HOMO-1 $\rightarrow$ 166 LUMO+2  |        |
|          |                                   | -0.16764     | 163 HOMO $\rightarrow$ 165 LUMO+1    |        |
| -0.32267 | 163 HOMO $\rightarrow$ 166 LUMO+2 |              |                                      |        |
| 4        | 328.58                            | 0.66942      | 160 HOMO-3 $\rightarrow$ 164 LUMO    | 0.1280 |
| 5        | 324.14                            | -0.35689     | 159 HOMO-4 $\rightarrow$ 164 LUMO    | 0.3150 |
|          |                                   | 0.55804      | 161 HOMO-2 $\rightarrow$ 165 LUMO +1 |        |
|          |                                   | -0.10654     | 162 HOMO-1 $\rightarrow$ 164 LUMO    |        |
|          |                                   | 0.11546      | 162 HOMO-1 $\rightarrow$ 167 LUMO+3  |        |

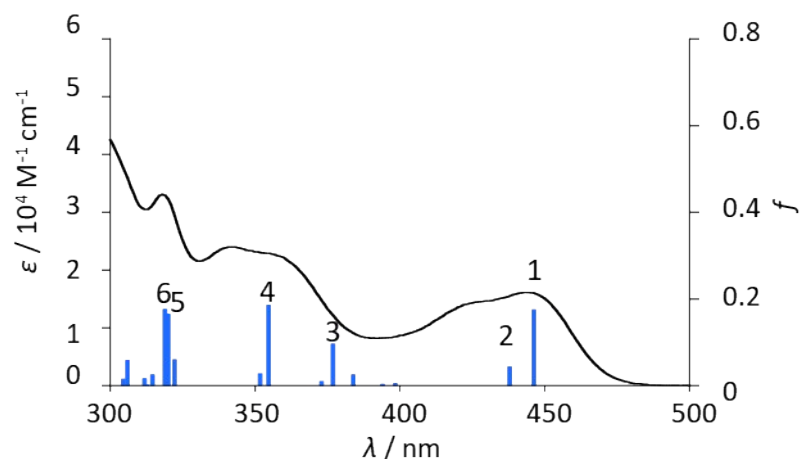

**Figure S5-6.** Experimental molar absorption in THF and calculated oscillator strengths  $f$  on the basis of optimized structure of **12c-Bu**.

**Table S5-5.** Selected calculated electronic transition of **12c-Bu** at the B3LYP/6-311G(d,p) level.

| No. | Wavelength (nm) | coefficients                                                                              | Electronic Transition                                                                                                                                                                                                                                                                                            | $f$    |
|-----|-----------------|-------------------------------------------------------------------------------------------|------------------------------------------------------------------------------------------------------------------------------------------------------------------------------------------------------------------------------------------------------------------------------------------------------------------|--------|
| 1   | 446.27          | 0.69201                                                                                   | 179 HOMO $\rightarrow$ 180 LUMO                                                                                                                                                                                                                                                                                  | 0.1752 |
| 2   | 437.86          | 0.68999                                                                                   | 178 HOMO-1 $\rightarrow$ 180 LUMO                                                                                                                                                                                                                                                                                | 0.0446 |
| 3   | 376.98          | 0.13631<br>-0.18227<br>-0.18689<br>0.58211<br>-0.21770                                    | 175 HOMO-4 $\rightarrow$ 180 LUMO<br>176 HOMO-3 $\rightarrow$ 180 LUMO<br>177 HOMO-2 $\rightarrow$ 180 LUMO<br>178 HOMO-1 $\rightarrow$ 182 LUMO+2<br>179 HOMO $\rightarrow$ 181 LUMO+1                                                                                                                          | 0.0961 |
| 4   | 354.66          | 0.56271<br>-0.37071<br>0.12156                                                            | 176 HOMO-3 $\rightarrow$ 180 LUMO<br>177 HOMO-2 $\rightarrow$ 180 LUMO<br>179 HOMO $\rightarrow$ 182 LUMO+2                                                                                                                                                                                                      | 0.1866 |
| 5   | 319.99          | -0.15847<br>0.46270<br>-0.19140<br>0.14011<br>-0.23150<br>-0.13631<br>-0.13801<br>0.27852 | 175 HOMO-4 $\rightarrow$ 180 LUMO<br>175 HOMO-4 $\rightarrow$ 181 LUMO+1<br>176 HOMO-3 $\rightarrow$ 181 LUMO+1<br>176 HOMO-3 $\rightarrow$ 182 LUMO+2<br>177 HOMO-2 $\rightarrow$ 181 LUMO+1<br>177 HOMO-2 $\rightarrow$ 182 LUMO+2<br>178 HOMO-1 $\rightarrow$ 184 LUMO+4<br>179 HOMO $\rightarrow$ 183 LUMO-3 | 0.1653 |
| 6   | 318.90          | 0.10102<br>0.20709<br>0.25925<br>0.25977<br>0.41917<br>-0.33440                           | 175 HOMO-4 $\rightarrow$ 180 LUMO<br>175 HOMO-4 $\rightarrow$ 181 LUMO+1<br>176 HOMO-3 $\rightarrow$ 181 LUMO+1<br>176 HOMO-3 $\rightarrow$ 182 LUMO+2<br>177 HOMO-2 $\rightarrow$ 181 LUMO+1<br>177 HOMO-2 $\rightarrow$ 182 LUMO+2                                                                             | 0.1765 |

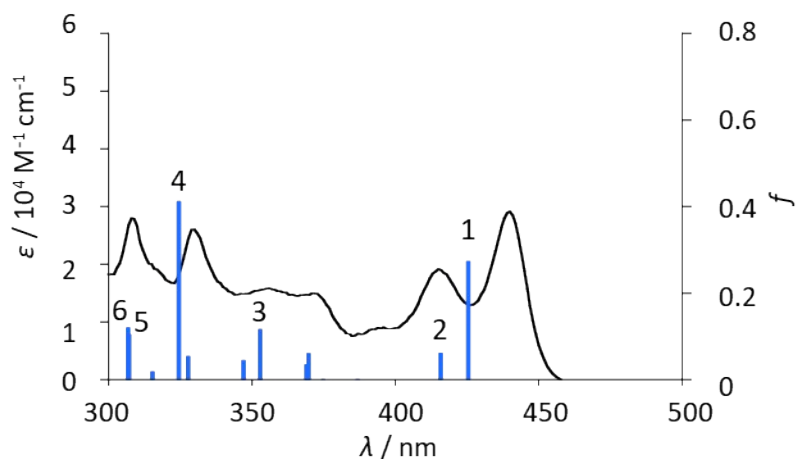

**Figure S5-7.** Experimental molar absorption in THF and calculated oscillator strengths  $f$  on the basis of optimized structure of **14-Bu**.

**Table S5-6.** Selected calculated electronic transition of **14-Bu** at the B3LYP/6-311G(d,p) level.

| No. | Wavelength (nm) | coefficients                                                       | Electronic Transition                                                                                                                                      | $f$    |
|-----|-----------------|--------------------------------------------------------------------|------------------------------------------------------------------------------------------------------------------------------------------------------------|--------|
| 1   | 425.48          | 0.12707<br>0.68436                                                 | 163 HOMO-3 → 168 LUMO+1<br>166 HOMO → 167 LUMO                                                                                                             | 0.2737 |
| 2   | 415.82          | -0.12348<br>0.11279<br>0.67768                                     | 163 HOMO-3 → 169 LUMO+2<br>164 HOMO-2 → 167 LUMO<br>165 HOMO-1 → 167 LUMO                                                                                  | 0.0618 |
| 3   | 352.92          | 0.24859<br>-0.19788<br>0.60739                                     | 164 HOMO-2 → 167 LUMO<br>165 HOMO-1 → 168 LUMO+1<br>166 HOMO → 169 LUMO+2                                                                                  | 0.1160 |
| 4   | 324.57          | -0.36808<br>0.54462<br>-0.15857<br>-0.12765                        | 162 HOMO-4 → 167 LUMO<br>163 HOMO-3 → 168 LUMO+1<br>165 HOMO-1 → 168 LUMO+2<br>166 HOMO → 167 LUMO                                                         | 0.4116 |
| 5   | 307.25          | -0.27859<br>-0.13033<br>0.44751<br>-0.29277<br>-0.10217<br>0.24710 | 162 HOMO-4 → 167 LUMO<br>163 HOMO-3 → 168 LUMO+1<br>163 HOMO-3 → 169 LUMO+2<br>164 HOMO-2 → 169 LUMO+2<br>166 HOMO → 170 LUMO+3<br>166 HOMO → 171 LUMO+4   | 0.1047 |
| 6   | 306.84          | 0.30522<br>0.14147<br>0.41992<br>0.29102<br>0.10963<br>-0.25922    | 162 HOMO-4 → 167 LUMO<br>163 HOMO-3 → 168 LUMO+1<br>163 HOMO-3 → 169 LUMO+2<br>164 HOMO-2 → 169 LUMO+2<br>165 HOMO-1 → 170 LUMO+3<br>166 HOMO → 170 LUMO+3 | 0.1198 |

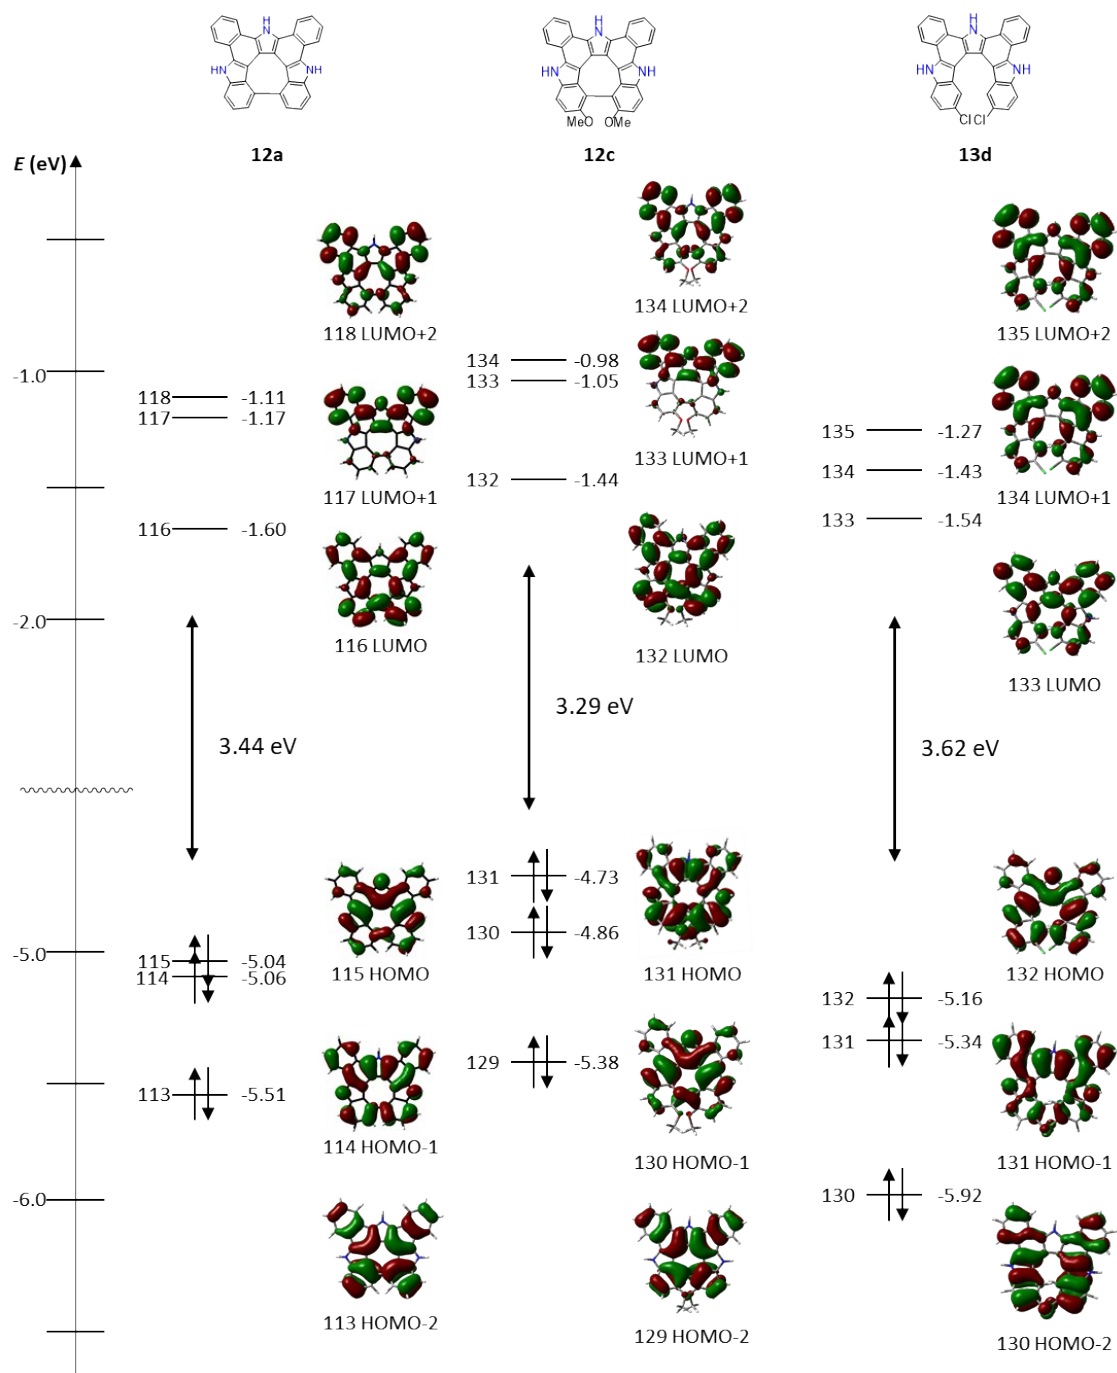

**Figure S5-8.** Kohn-Sham MO representation and energy diagrams of **12a** (left), **12c** (center) and **13d** (right).

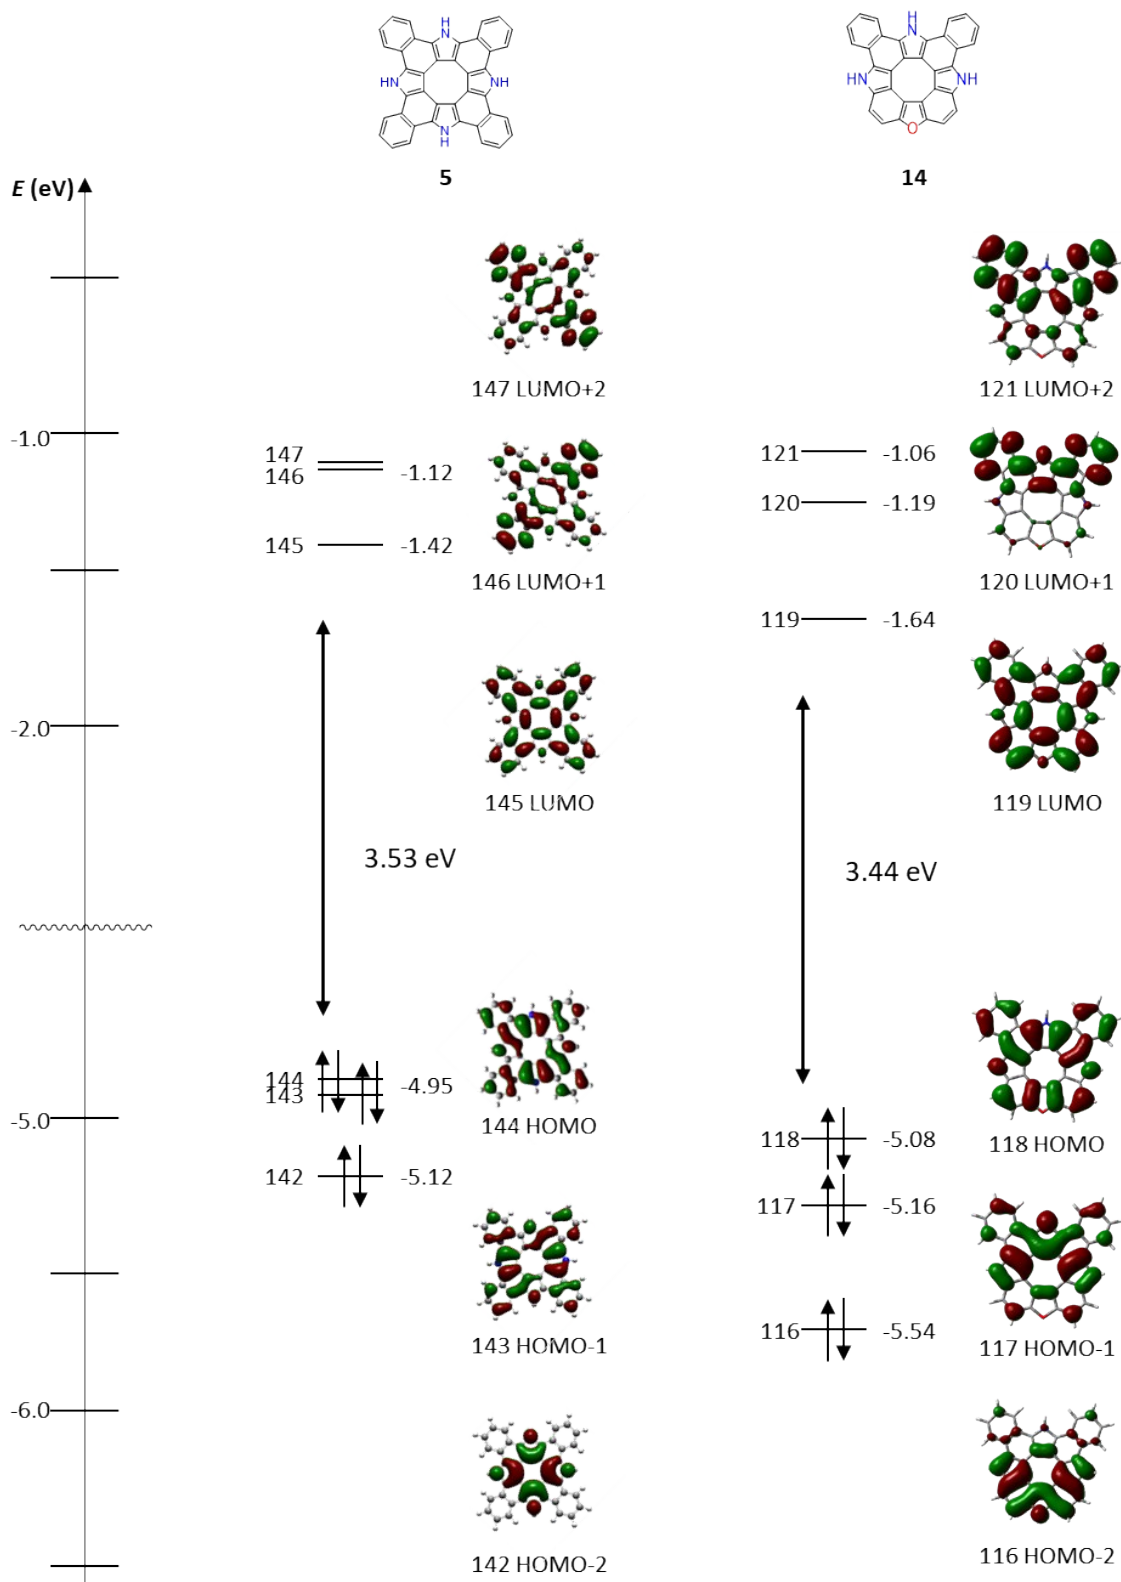

**Figure S5-9.** Kohn-Sham MO representation and energy diagrams of **5** (left) and **14** (right).



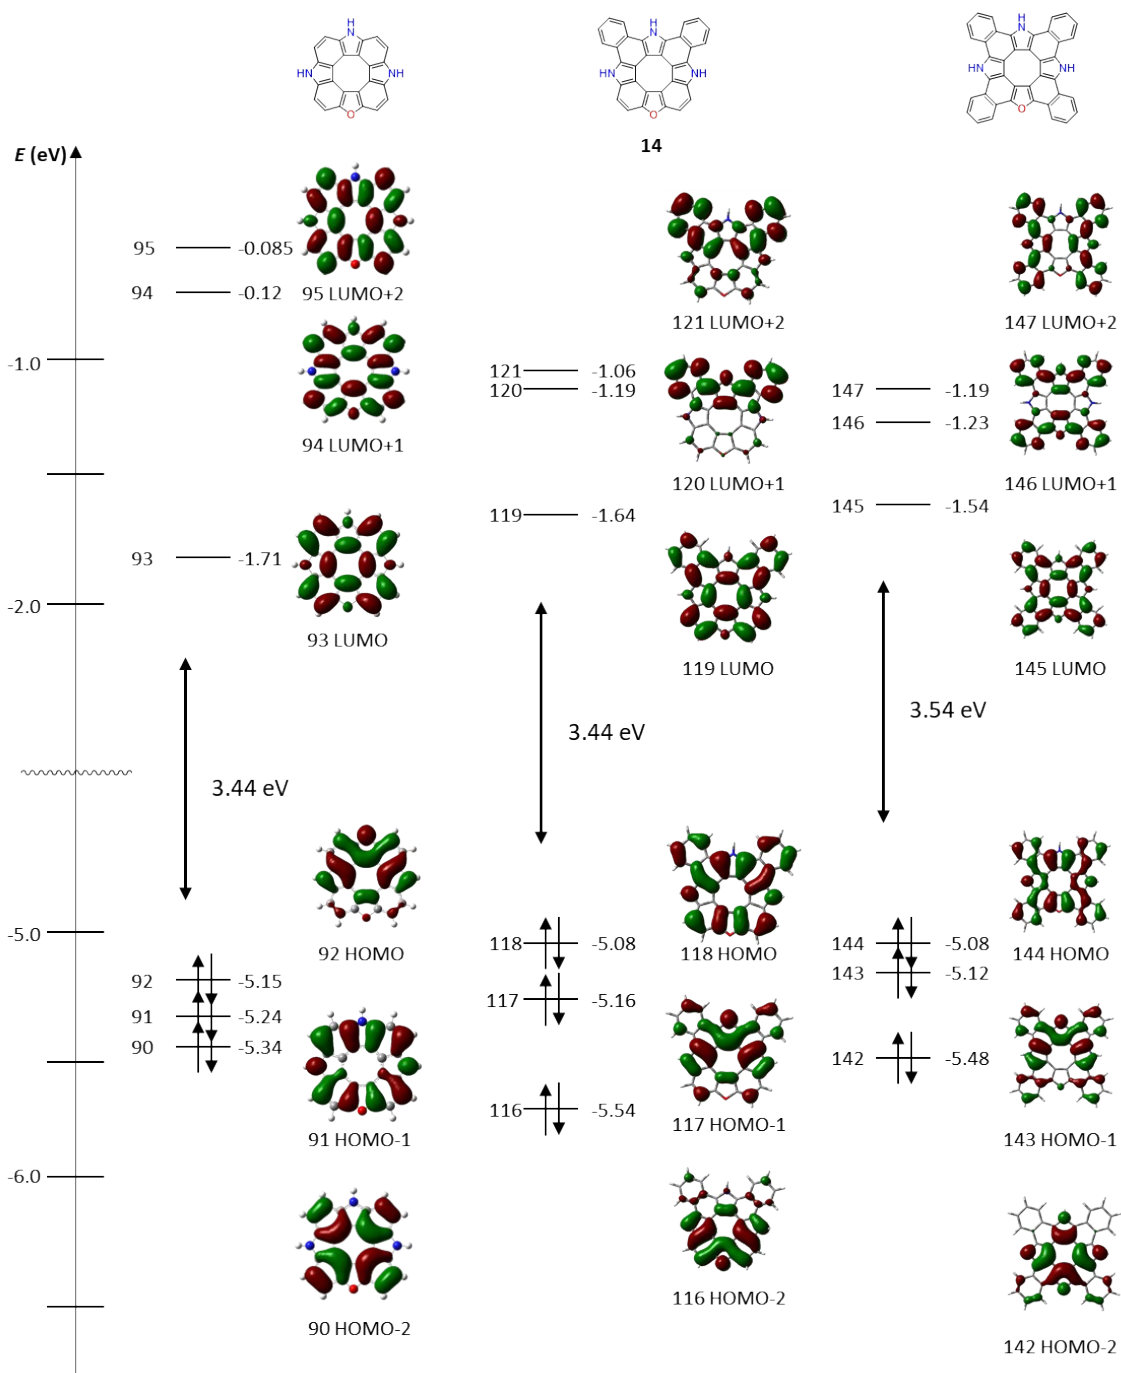

**Figure S5-10.** Kohn-Sham MO representation and energy diagrams of triazaoxa[8]circulene, dibenzotriazaoxa[8]circulene (left) **14** (center) and tetrabenzotriazaoxa[8]circulene (right).

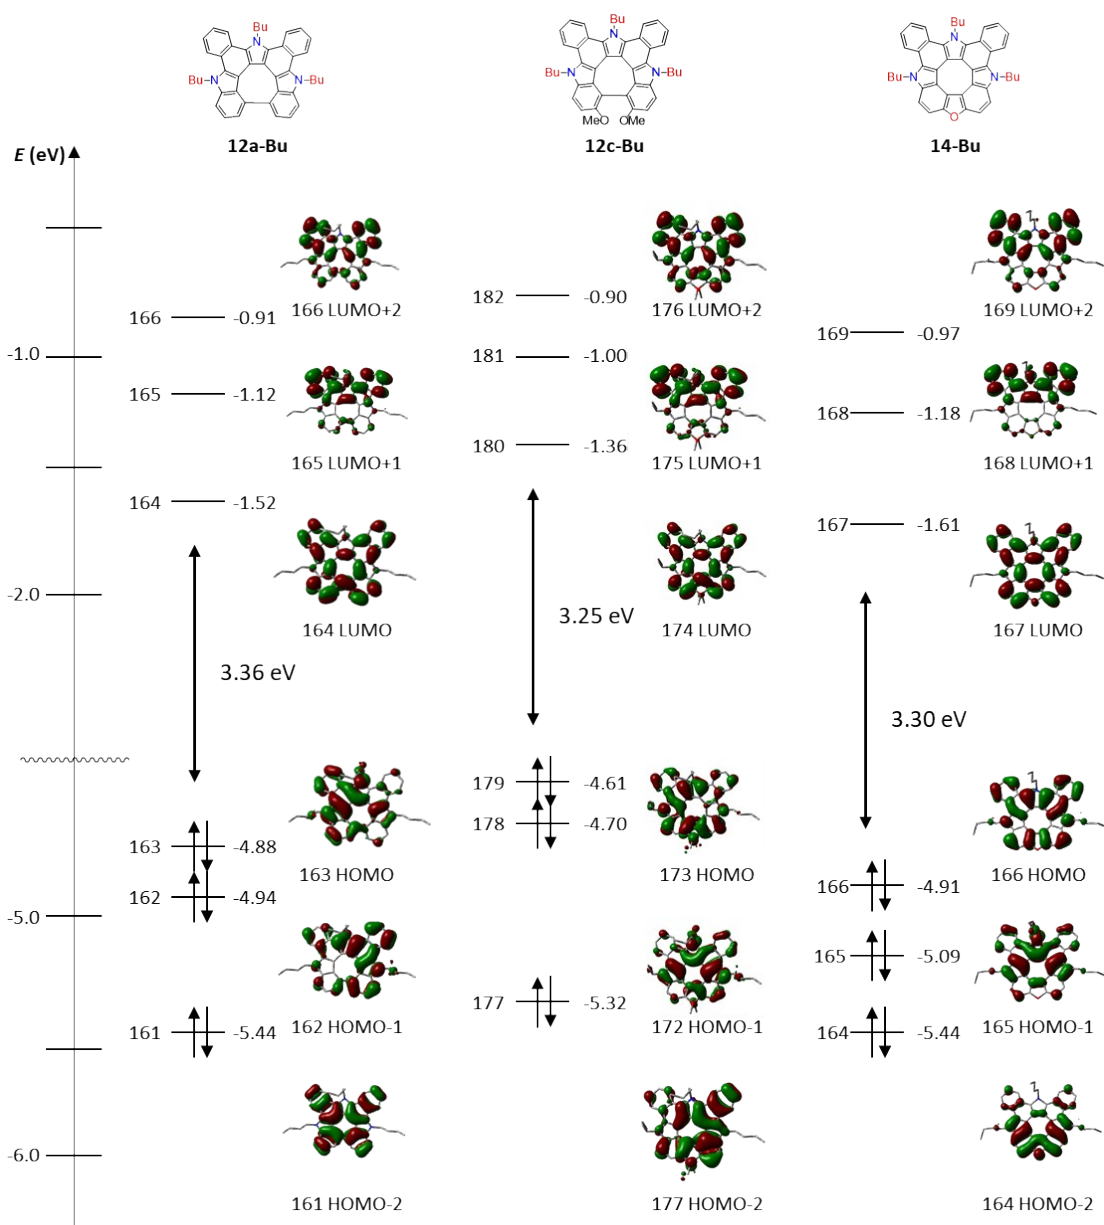

**Figure S5-11.** Kohn-Sham MO representation and energy diagrams of **12a-Bu** (left), **12c-Bu** (center) and **14-Bu** (right). Hydrogen molecules are omitted for clarity.

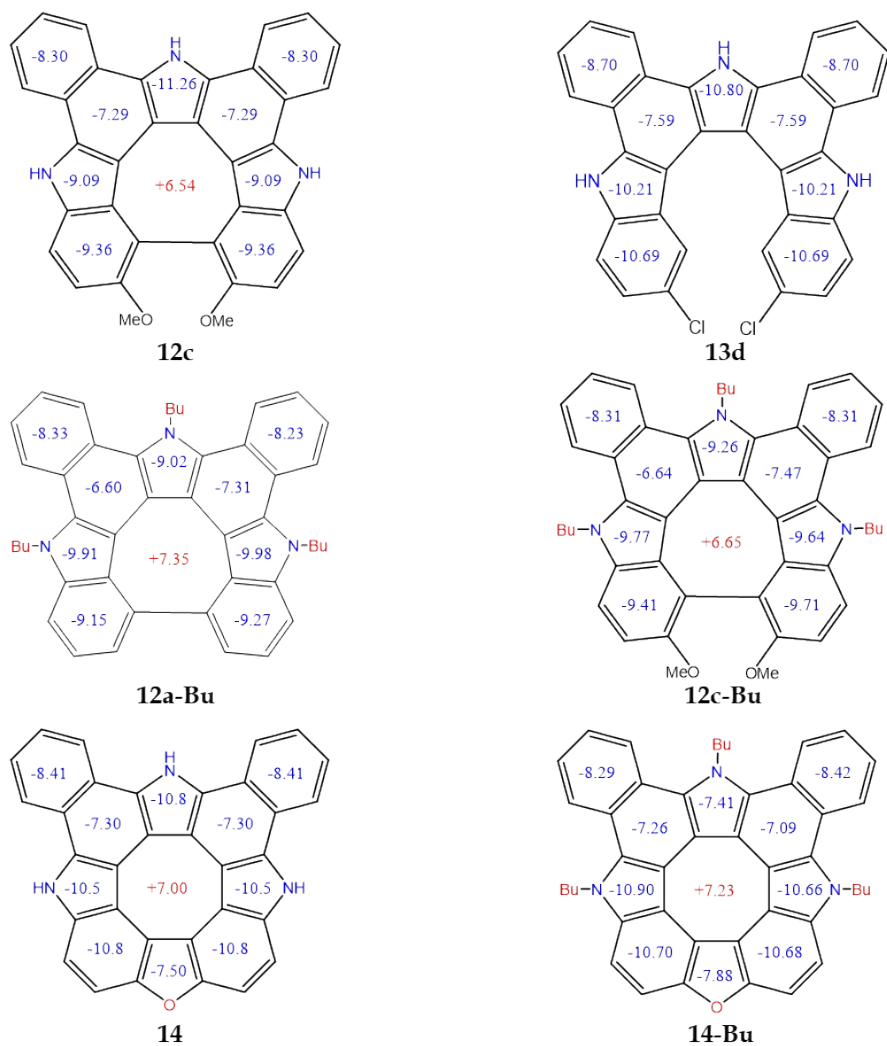

**Figure S5-12.** Calculated NICS(0)<sub>iso</sub> values (in ppm) of **12c**, **13d**, **12a-Bu**, **12c-Bu**, **14** and **14-Bu**. The values were calculated at the center of each ring.

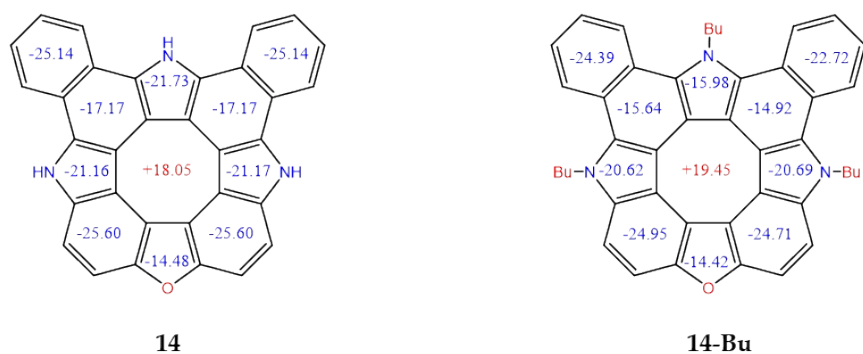

**Figure S5-13.** Calculated NICS(1)<sub>zz</sub> values (in ppm) of **14** and **14-Bu**. The values were calculated 1 Å above the center of each ring.

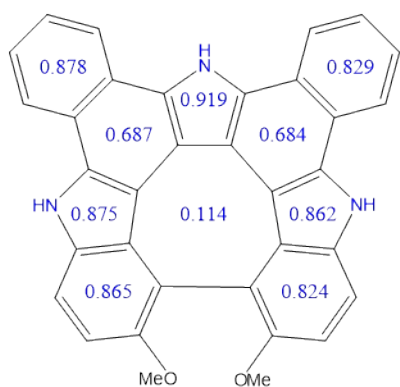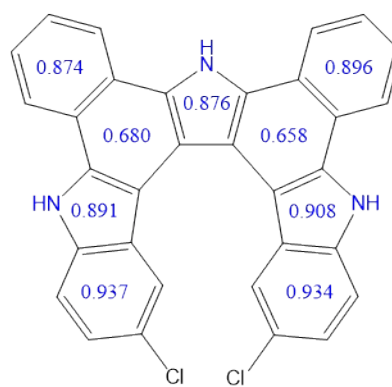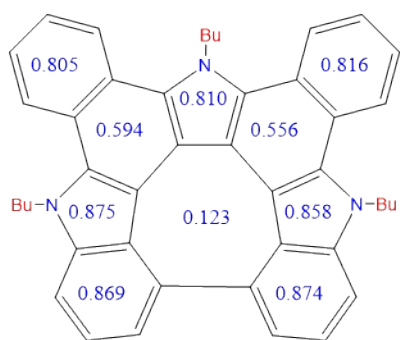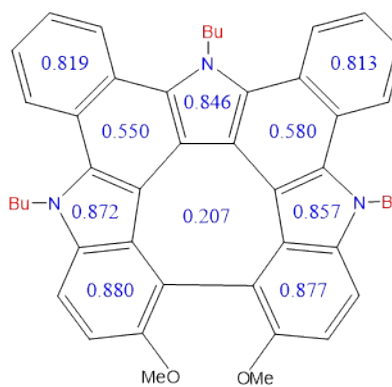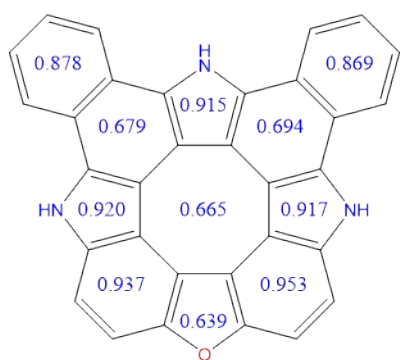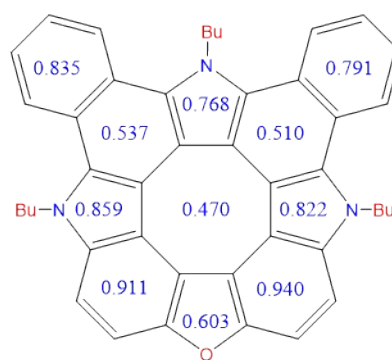

Figure S5-14. Calculated HOMA values<sup>[S7,8]</sup> of each ring from crystal structures.

## 6. X-Ray Crystallographic Details

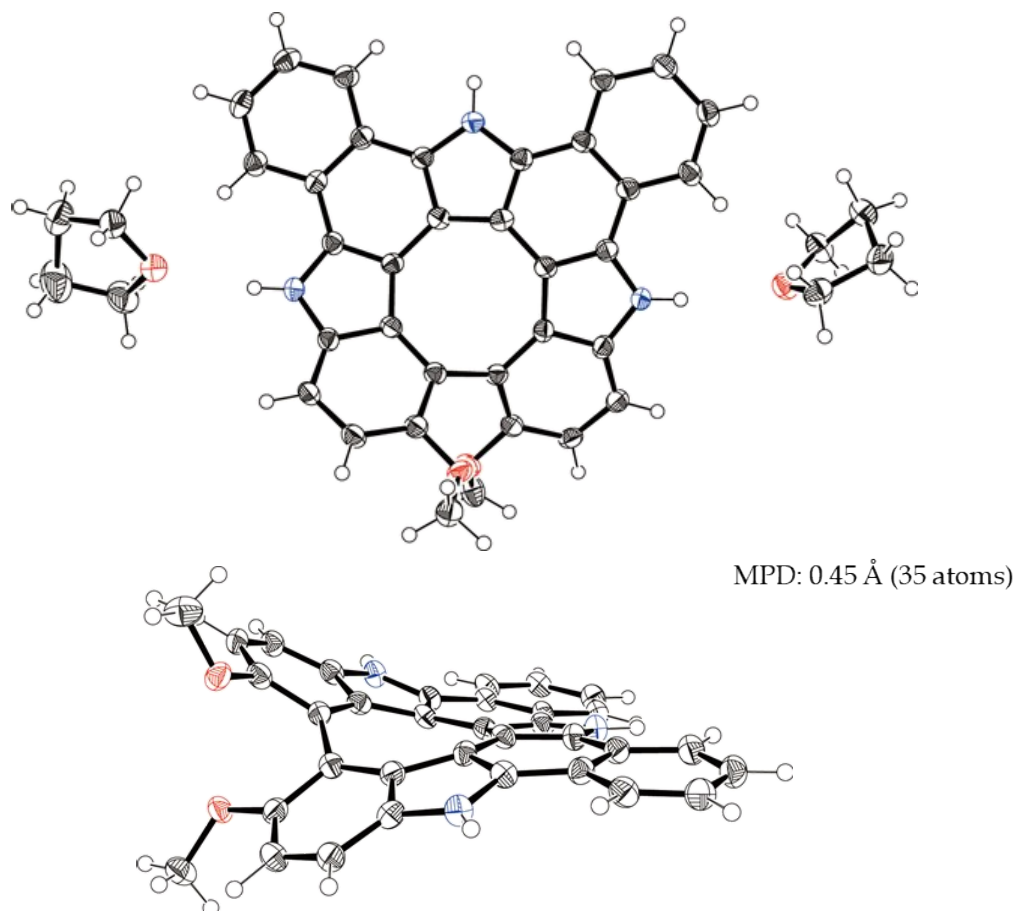

**Figure S6-1.** X-Ray crystal structure of **12c**. Thermal ellipsoids were scaled to 50% probability.

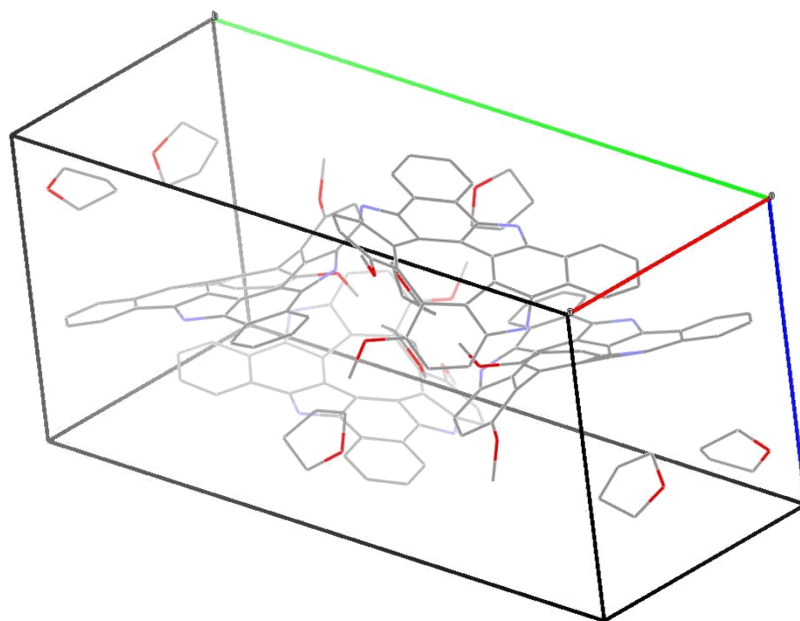

**Figure S6-2.** Packing structure of **12c**. Hydrogen atoms were omitted for clarity.

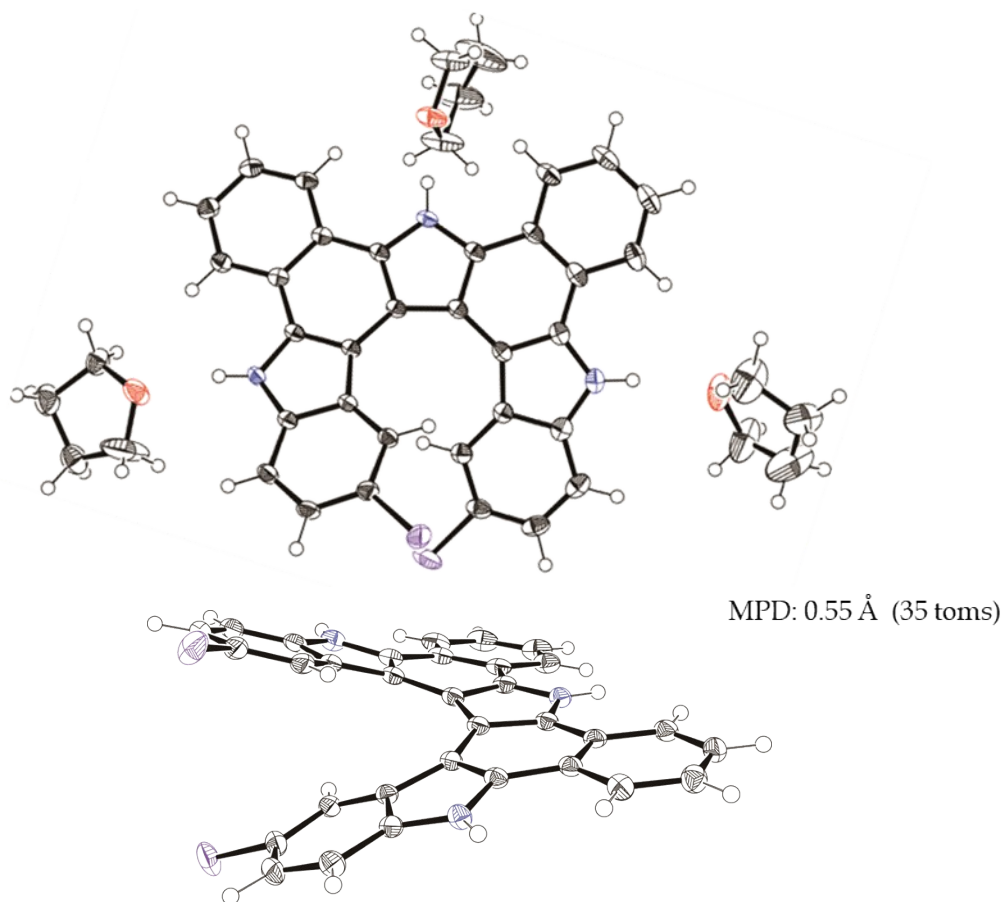

**Figure S6-3.** X-Ray crystal structure of **13d**. Thermal ellipsoids were scaled to 50% probability.

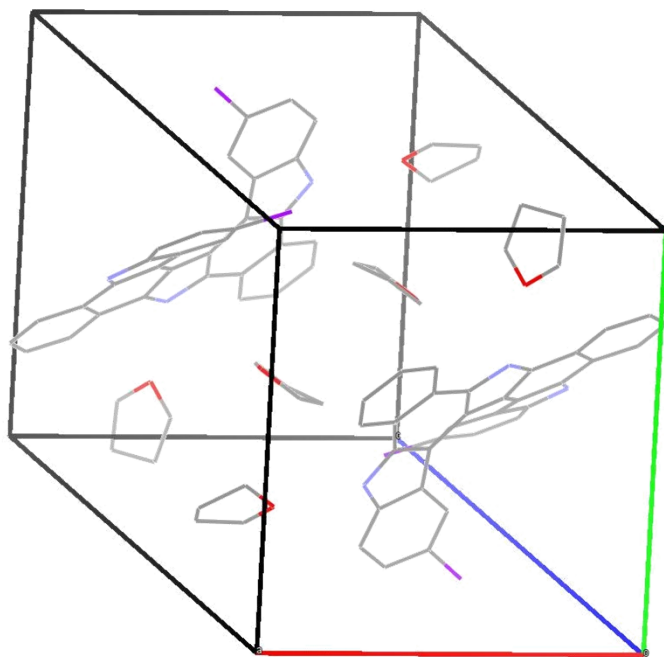

**Figure S6-4.** Packing structure of **13d**. Hydrogen atoms were omitted for clarity.

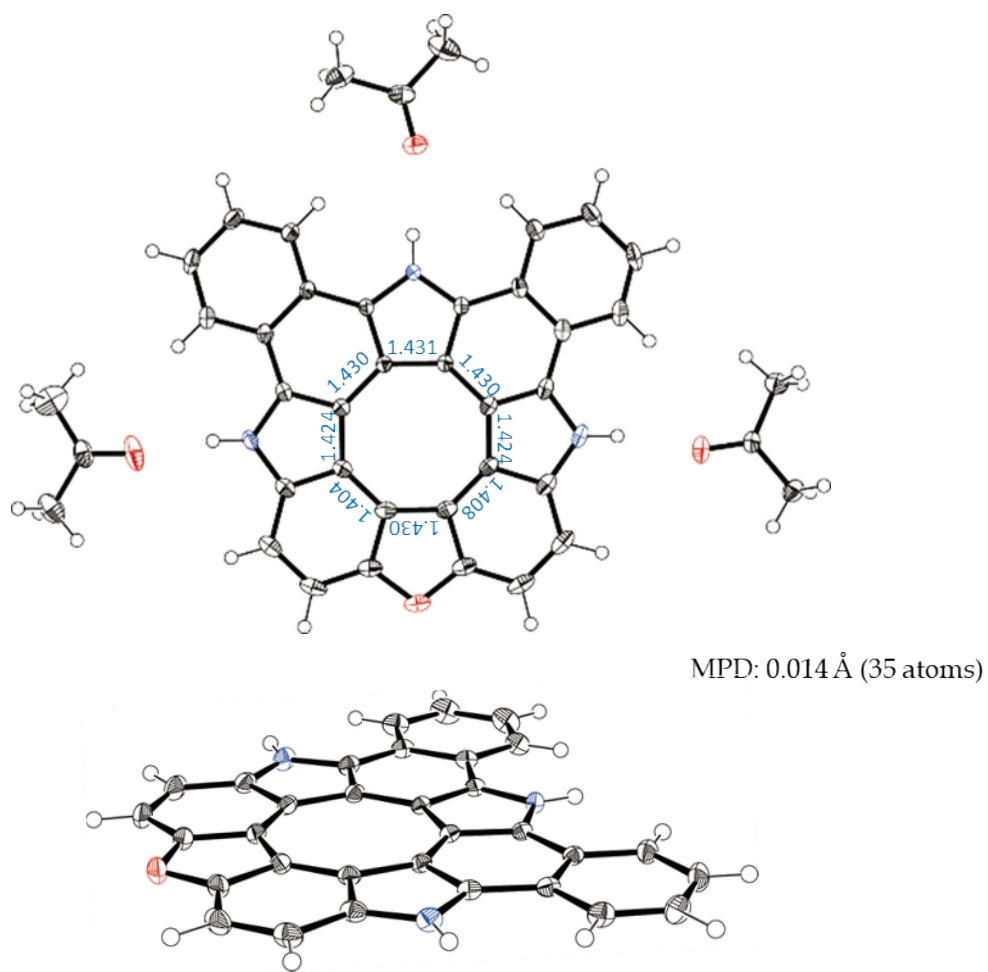

**Figure S6-5.** X-Ray crystal structure of **14**. Thermal ellipsoids were scaled to 50% probability.

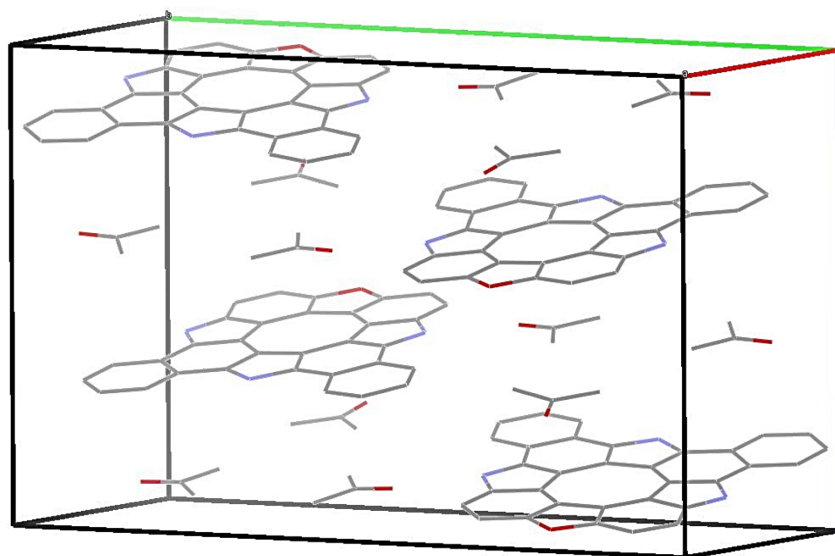

**Figure S6-6.** Packing structure of **14**. Hydrogen atoms were omitted for clarity.

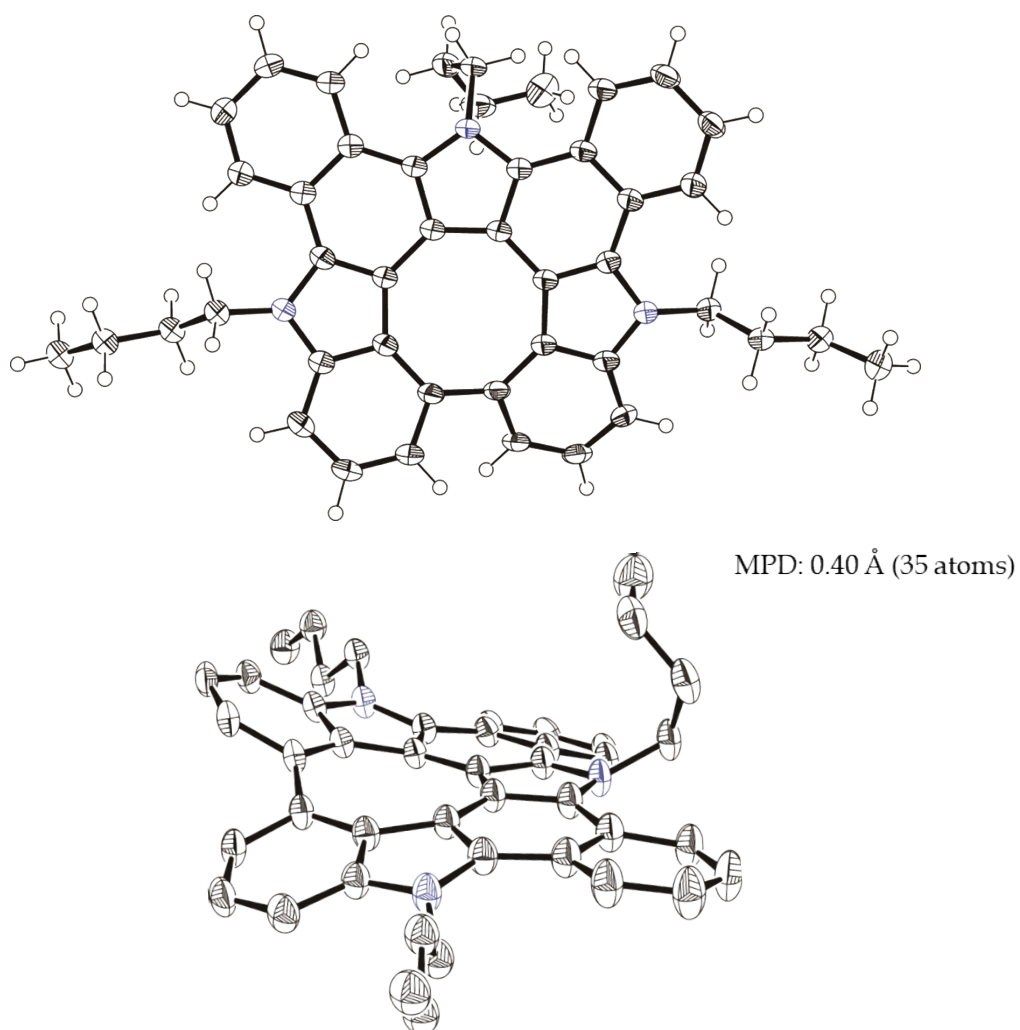

**Figure S6-7.** X-Ray crystal structure of **12a-Bu**. Thermal ellipsoids were scaled to 50% probability. Solvent molecules omitted for clarity. Hydrogen atoms were omitted for clarity (bottom).

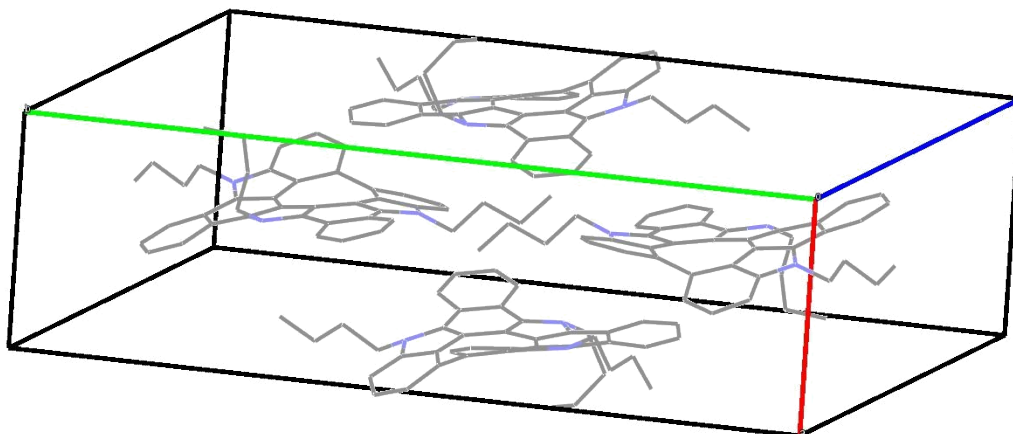

**Figure S6-8.** Packing structure of **12a-Bu**. Hydrogen atoms were omitted for clarity.



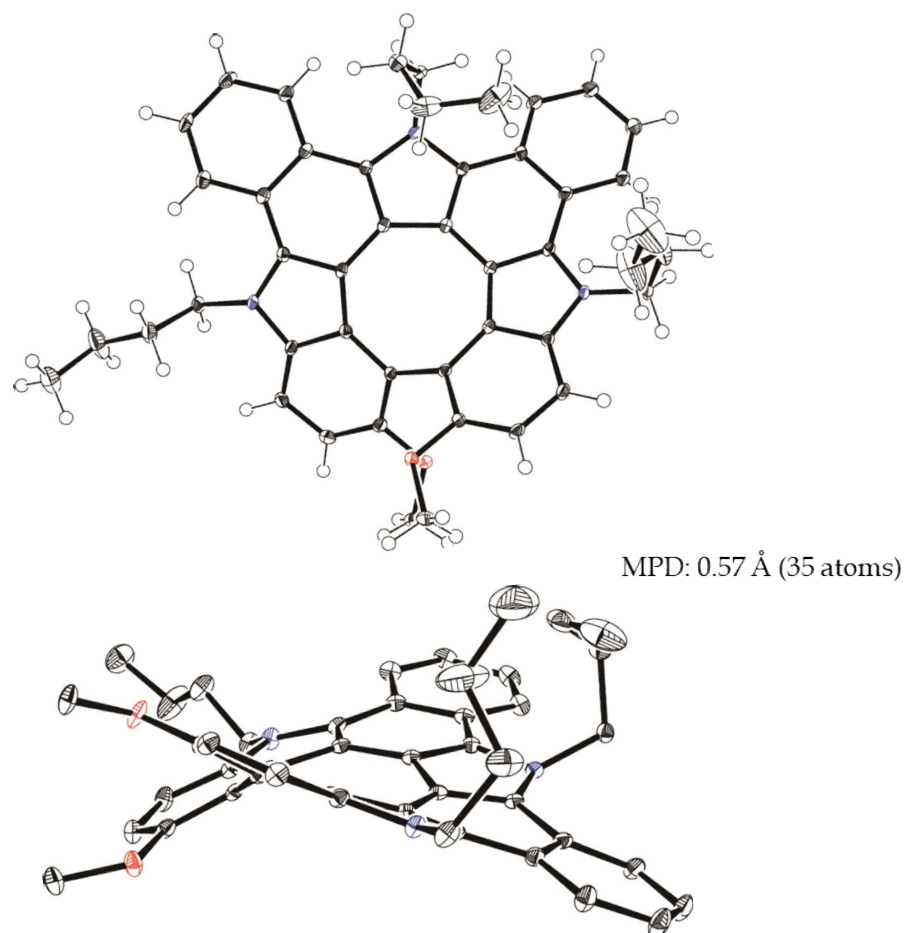

**Figure S6-9.** X-Ray crystal structure of **12c-Bu**. Thermal ellipsoids were scaled to 50% probability. Solvent molecules omitted for clarity. Hydrogen atoms were omitted for clarity (bottom).

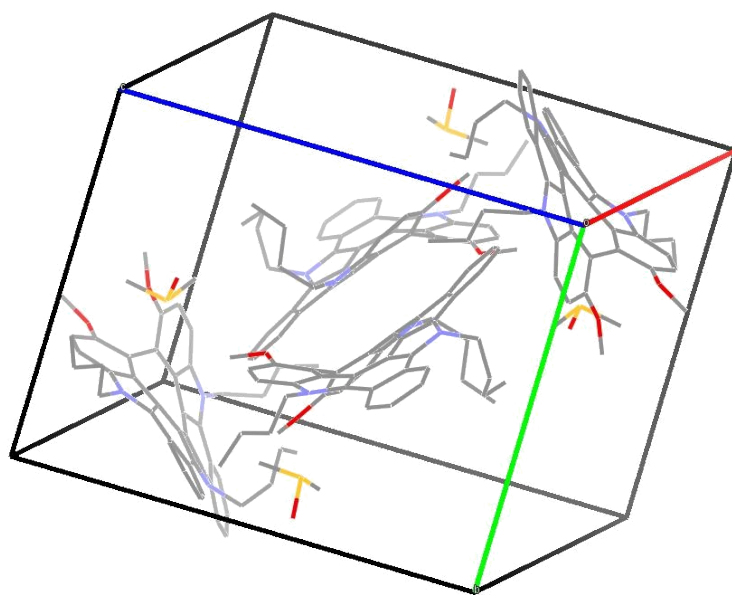

**Figure S6-10.** Packing structure of **12c-Bu**. Hydrogen atoms were omitted for clarity.

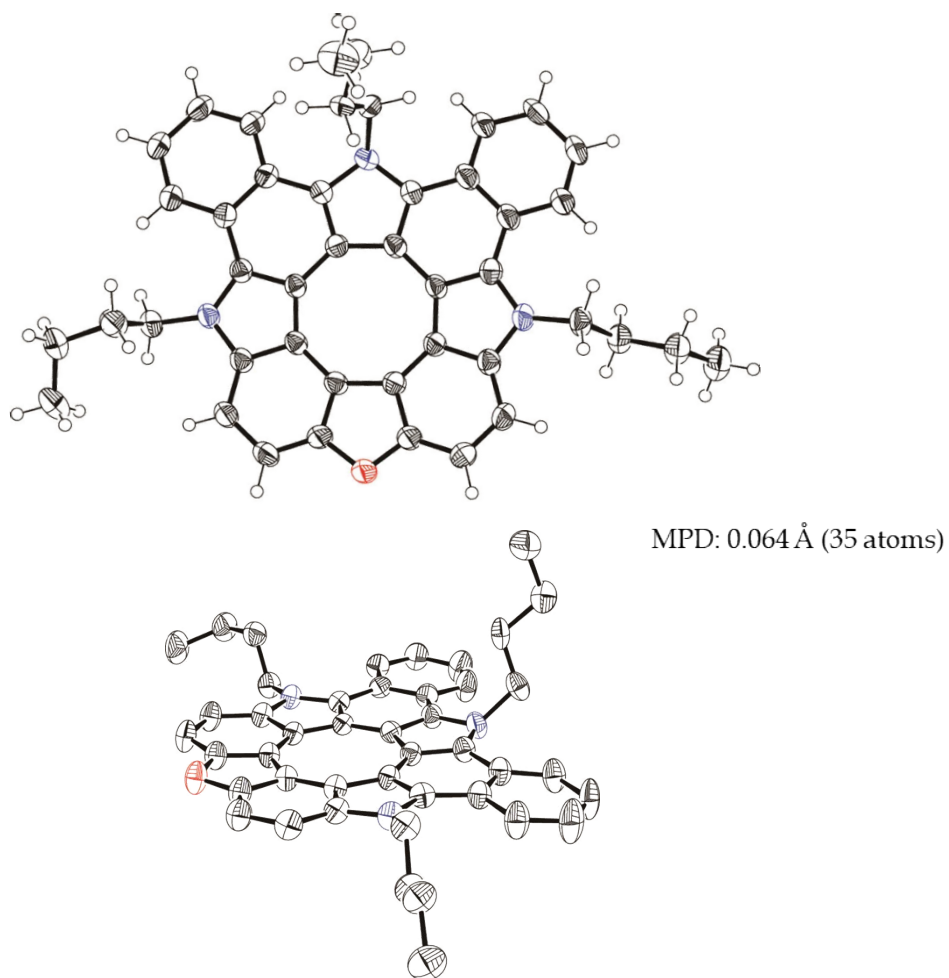

**Figure S6-11.** X-Ray crystal structure of **14-Bu**. Thermal ellipsoids were scaled to 50% probability. Solvent molecules omitted for clarity. Hydrogen atoms were omitted for clarity (bottom).

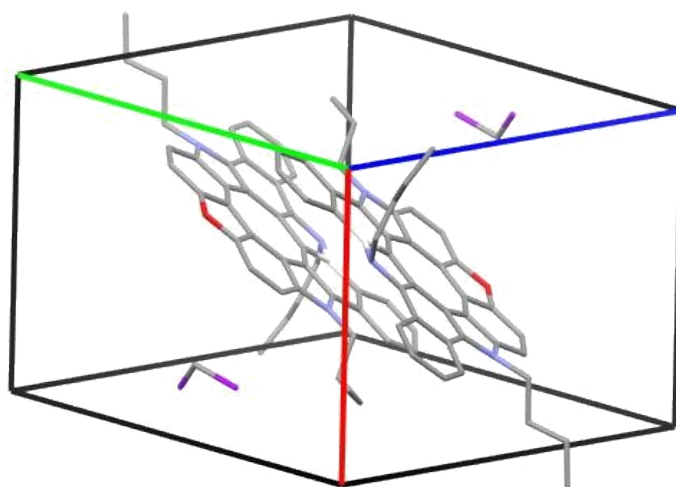

**Figure S6-12.** Packing structure of **14-Bu**. Hydrogen atoms were omitted for clarity.

**Table S6-1.** Crystal data and structure refinements for **12c**, **13d** and **14**.

| Compound                                           | <b>12c</b>                                                                          | <b>13d</b>                                                                                          | <b>14</b>                                                                            |
|----------------------------------------------------|-------------------------------------------------------------------------------------|-----------------------------------------------------------------------------------------------------|--------------------------------------------------------------------------------------|
| Empirical Formula                                  | C <sub>34</sub> H <sub>21</sub> O <sub>2</sub> , 2(C <sub>4</sub> H <sub>8</sub> O) | C <sub>32</sub> H <sub>27</sub> N <sub>3</sub> Cl <sub>2</sub> , 3(C <sub>4</sub> H <sub>8</sub> O) | C <sub>32</sub> H <sub>15</sub> N <sub>3</sub> O, 3(C <sub>3</sub> H <sub>6</sub> O) |
| <i>M<sub>w</sub></i>                               | 647.78                                                                              | 730.70                                                                                              | 631.73                                                                               |
| Crystal System                                     | monoclinic                                                                          | triclinic                                                                                           | monoclinic                                                                           |
| Space Group                                        | <i>P</i> 2 <sub>1</sub> / <i>n</i> (No. 14)                                         | <i>P</i> -1 (No. 2)                                                                                 | <i>P</i> 2 <sub>1</sub> / <i>c</i> (No. 14)                                          |
| <i>a</i> [Å]                                       | 10.5709(4)                                                                          | 12.0391(15)                                                                                         | 10.5647(16)                                                                          |
| <i>b</i> [Å]                                       | 24.7927(5)                                                                          | 12.6294(18)                                                                                         | 21.451(4)                                                                            |
| <i>c</i> [Å]                                       | 11.9563(3)                                                                          | 12.8334(8)                                                                                          | 13.969(2)                                                                            |
| <i>α</i> [deg]                                     | 90                                                                                  | 74.367(11)                                                                                          | 90                                                                                   |
| <i>β</i> [deg]                                     | 93.905(3)                                                                           | 75.366(11)                                                                                          | 91.911(5)                                                                            |
| <i>γ</i> [deg]                                     | 90                                                                                  | 86.809(19)                                                                                          | 90                                                                                   |
| Volume [Å <sup>3</sup> ]                           | 3126.25(16)                                                                         | 1818.0(4)                                                                                           | 3163.9(9)                                                                            |
| <i>Z</i>                                           | 4                                                                                   | 2                                                                                                   | 4                                                                                    |
| Density [g/cm <sup>3</sup> ]                       | 1.376                                                                               | 1.335                                                                                               | 1.326                                                                                |
| Completeness                                       | 0.969                                                                               | 0.979                                                                                               | 0.986                                                                                |
| Goodness-of-fit                                    | 1.082                                                                               | 1.055                                                                                               | 1.077                                                                                |
| <i>R</i> <sub>1</sub> [ <i>I</i> > 2σ( <i>I</i> )] | 0.0887                                                                              | 0.0599                                                                                              | 0.0360                                                                               |
| <i>wR</i> <sub>2</sub> (all data)                  | 0.3301                                                                              | 0.1563                                                                                              | 0.1095                                                                               |
| Solvent System                                     | THF/ <i>n</i> -hexane                                                               | THF/ <i>n</i> -hexane                                                                               | acetone/ <i>n</i> -hexane                                                            |
| CCDC No.                                           | 1953597                                                                             | 1953596                                                                                             | 1953592                                                                              |

**Table S6-2.** Crystal data and structure refinements for **12a-Bu**, **12c-Bu** and **14-Bu**.

| Compound                                           | <b>12a-Bu</b>                                      | <b>12c-Bu</b>                                                                                       | <b>14-Bu</b>                                                                      |
|----------------------------------------------------|----------------------------------------------------|-----------------------------------------------------------------------------------------------------|-----------------------------------------------------------------------------------|
| Empirical Formula                                  | C <sub>44</sub> H <sub>41</sub> N <sub>3</sub>     | C <sub>46</sub> H <sub>45</sub> N <sub>3</sub> O <sub>2</sub> · 2(C <sub>2</sub> H <sub>6</sub> OS) | C <sub>44</sub> H <sub>39</sub> N <sub>3</sub> O, CH <sub>2</sub> Cl <sub>2</sub> |
| <i>M<sub>w</sub></i>                               | 611.83                                             | 828.15                                                                                              | 710.75                                                                            |
| Crystal System                                     | monoclinic                                         | triclinic                                                                                           | triclinic                                                                         |
| Space Group                                        | <i>P</i> 2 <sub>1</sub> / <i>a</i> (No. 14)        | <i>P</i> -1 (No. 2)                                                                                 | <i>P</i> -1 (No.2)                                                                |
| <i>a</i> [Å]                                       | 8.191(3)                                           | 14.877(2)                                                                                           | 10.881(4)                                                                         |
| <i>b</i> [Å]                                       | 35.062(11)                                         | 15.0887(14)                                                                                         | 13.068(7)                                                                         |
| <i>c</i> [Å]                                       | 11.513(3)                                          | 17.9227(12)                                                                                         | 13.624(7)                                                                         |
| α [deg]                                            | 90                                                 | 71.320(5)                                                                                           | 114.604(18)                                                                       |
| β [deg]                                            | 107.607(5)                                         | 89.990(11)                                                                                          | 92.906(5)                                                                         |
| γ [deg]                                            | 90                                                 | 89.980(12)                                                                                          | 97.348(10)                                                                        |
| Volume [Å <sup>3</sup> ]                           | 3151.6(17)                                         | 3811.3(7)                                                                                           | 1735.2(14)                                                                        |
| <i>Z</i>                                           | 4                                                  | 2                                                                                                   | 2                                                                                 |
| Density [g/cm <sup>3</sup> ]                       | 1.289                                              | 1.307                                                                                               | 1.356                                                                             |
| Completeness                                       | 0.982                                              | 0.977                                                                                               | 0.977                                                                             |
| Goodness-of-fit                                    | 1.033                                              | 1.007                                                                                               | 1.010                                                                             |
| <i>R</i> <sub>1</sub> [ <i>I</i> > 2σ( <i>I</i> )] | 0.0610                                             | 0.0638                                                                                              | 0.0639                                                                            |
| <i>wR</i> <sub>2</sub> (all data)                  | 0.1769                                             | 0.1747                                                                                              | 0.1754                                                                            |
| Solvent System                                     | CH <sub>2</sub> Cl <sub>2</sub> / <i>n</i> -hexane | DMSO/ <i>n</i> -hexane                                                                              | CH <sub>2</sub> Cl <sub>2</sub> / <i>n</i> -hexane                                |
| CCDC No.                                           | 1953593                                            | 1953595                                                                                             | 1953594                                                                           |

## 7. UV/Vis Absorption and Emission Spectra

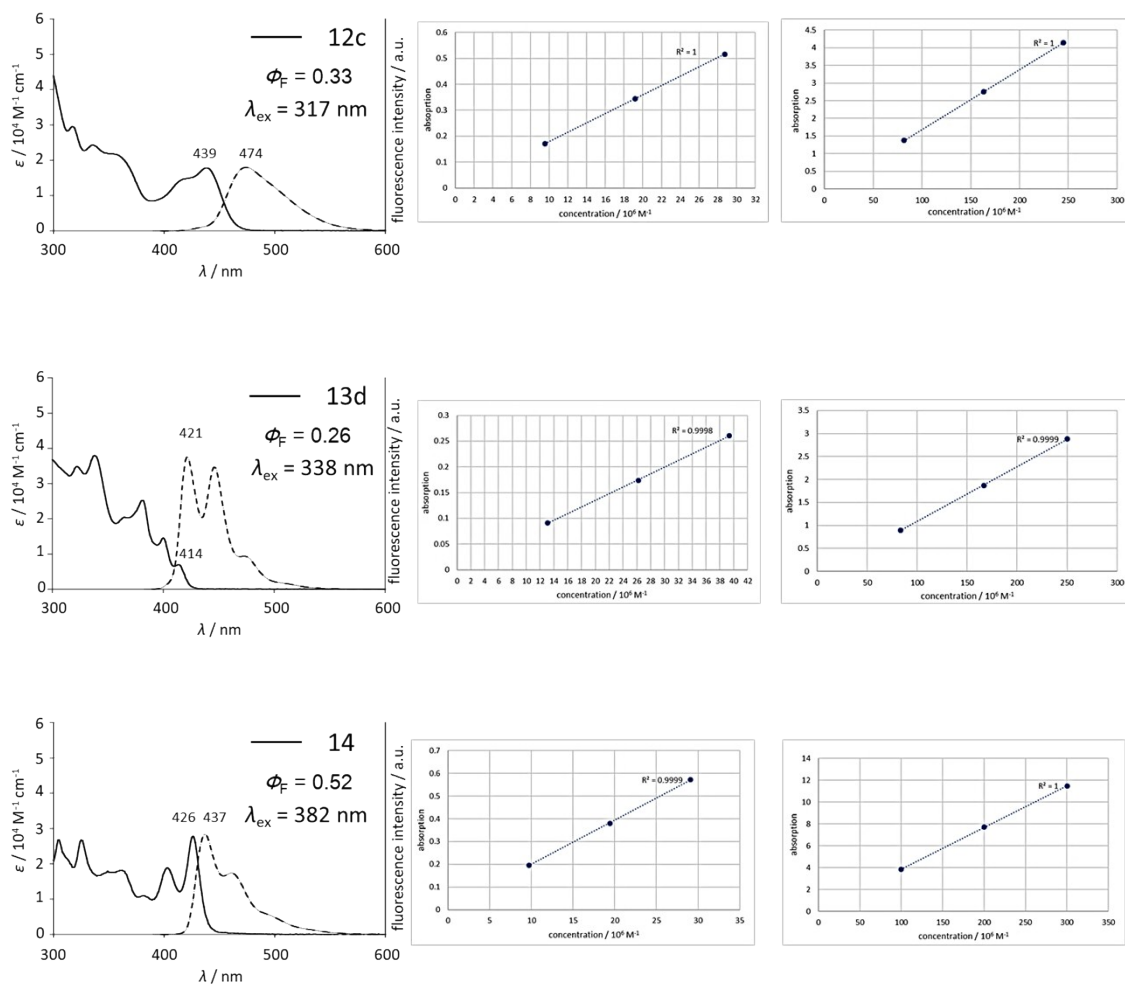

**Figure S7-1.** UV/Vis absorption and emission spectra of **12c**, **13d** and **14** in THF (left). UV/Vis absorption of **12c** (439 nm), **13d** (400 nm) and **14** (426 nm) in THF (right).

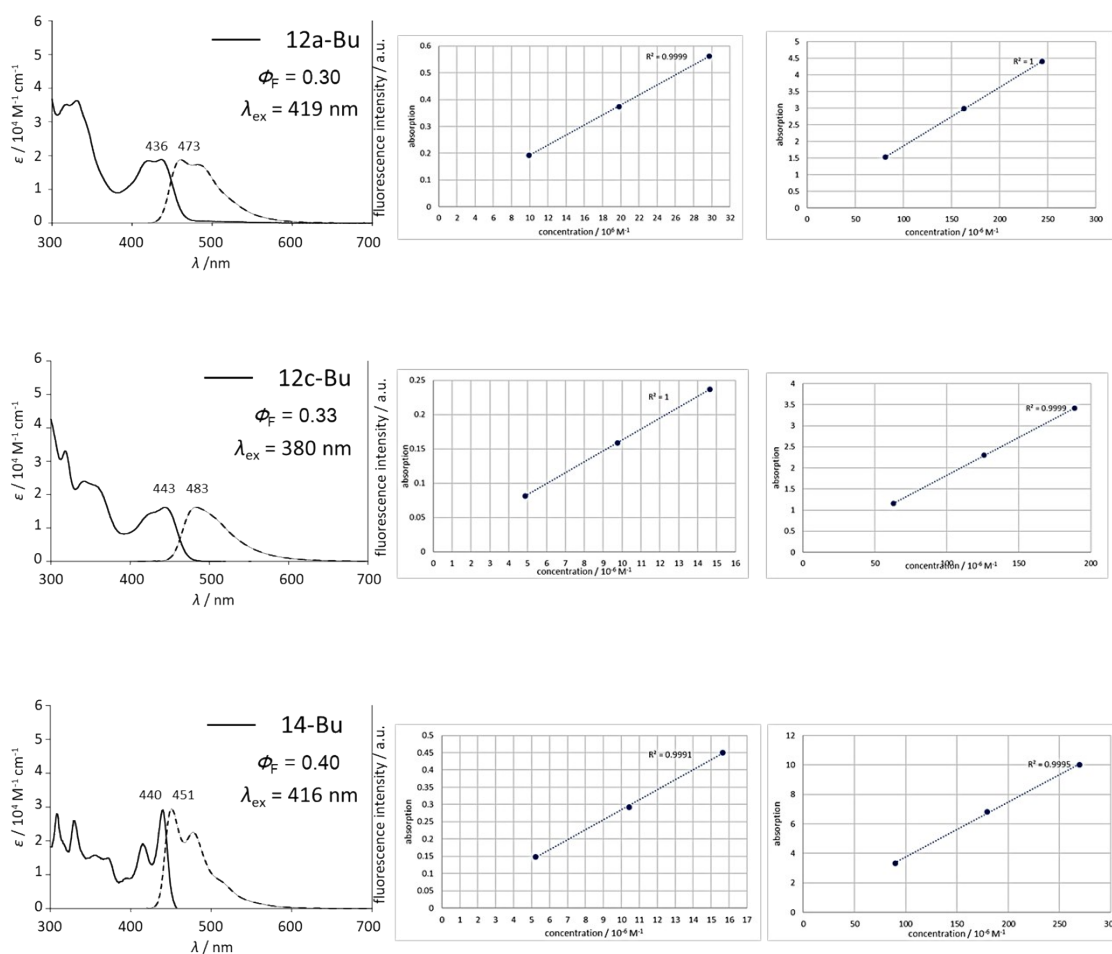

**Figure S7-2.** UV/Vis absorption and emission spectra of **12a-Bu**, **12c-Bu** and **14-Bu** in THF (left). UV/Vis absorption of **12a-Bu** (436 nm), **12c-Bu** (443 nm) and **14-Bu** (440 nm) in THF (right).

**Table S7-1.** Summary of the optical properties.

| Compound      | $\lambda_{\text{abs}}$ | $\lambda_{\text{ex}}$ | $\lambda_{\text{FL}}$ | Stokes shift          |
|---------------|------------------------|-----------------------|-----------------------|-----------------------|
| <b>12c</b>    | 426 nm                 | 382 nm                | 474 nm                | 1680 $\text{cm}^{-1}$ |
| <b>13d</b>    | 414 nm                 | 338 nm                | 421 nm                | 400 $\text{cm}^{-1}$  |
| <b>14</b>     | 426 nm                 | 317 nm                | 437 nm                | 590 $\text{cm}^{-1}$  |
| <b>12a-Bu</b> | 436 nm                 | 419 nm                | 473 nm                | 1790 $\text{cm}^{-1}$ |
| <b>12c-Bu</b> | 443 nm                 | 380 nm                | 483 nm                | 1870 $\text{cm}^{-1}$ |
| <b>14-Bu</b>  | 440 nm                 | 416 nm                | 451 nm                | 550 $\text{cm}^{-1}$  |

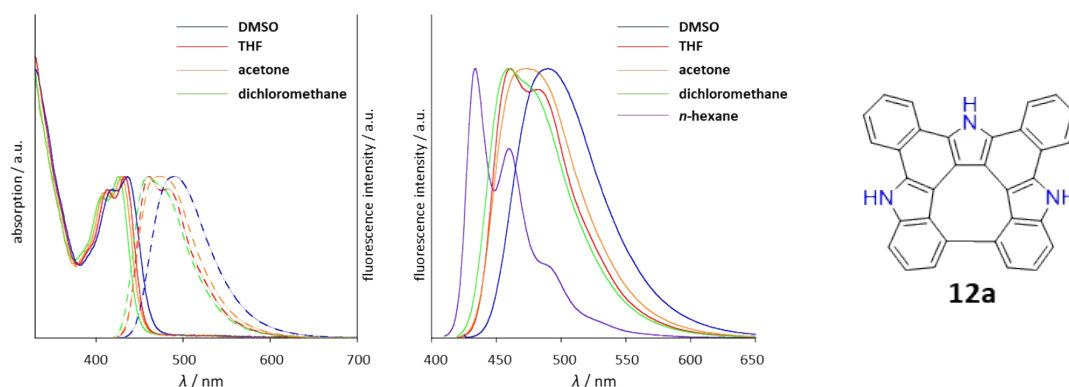

**Figure S7-3.** Normalized absorption and emission spectra of **12a** in DMSO (blue line), THF (red line), acetone (orange line), dichloromethane (green line) and *n*-hexane (purple line).

**Table S7-2.** Summary of the optical properties of **12a**.

| Solvent          | $\lambda_{\text{abs}}$ | $\lambda_{\text{ex}}$ | $\lambda_{\text{FL}}$ | Stokes shift          |
|------------------|------------------------|-----------------------|-----------------------|-----------------------|
| <i>n</i> -hexane | 426 nm                 | 400 nm                | 434 nm                | 430 $\text{cm}^{-1}$  |
| THF              | 433 nm                 | 414 nm                | 462 nm                | 1450 $\text{cm}^{-1}$ |
| dichloromethane  | 426 nm                 | 406 nm                | 459 nm                | 1690 $\text{cm}^{-1}$ |
| acetone          | 429 nm                 | 411 nm                | 474 nm                | 2210 $\text{cm}^{-1}$ |
| DMSO             | 436 nm                 | 419 nm                | 490 nm                | 2530 $\text{cm}^{-1}$ |

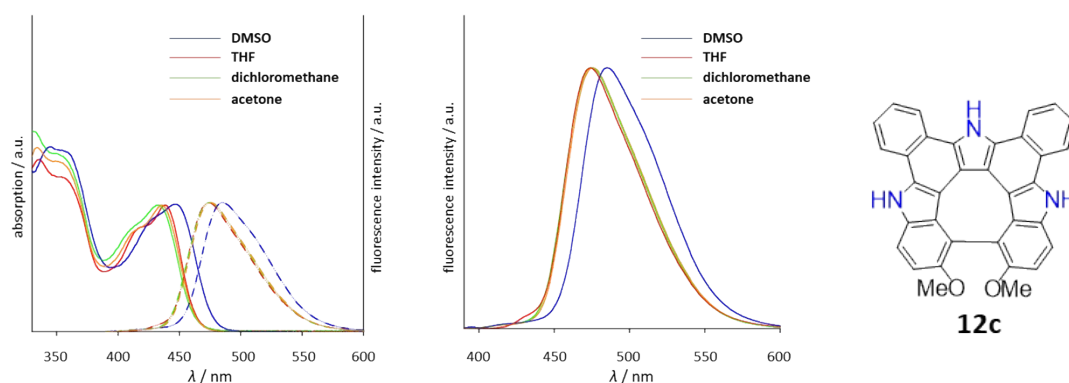

**Figure S7-4.** Normalized absorption and emission spectra of **12c** in DMSO (blue line), THF (red line), acetone (orange line) and dichloromethane (green line).

**Table S7-3.** Summary of the optical properties of **12c**.

| Solvent         | $\lambda_{\text{abs}}$ | $\lambda_{\text{ex}}$ | $\lambda_{\text{FL}}$ | Stokes shift          |
|-----------------|------------------------|-----------------------|-----------------------|-----------------------|
| THF             | 439 nm                 | 317 nm                | 474 nm                | 1680 $\text{cm}^{-1}$ |
| dichloromethane | 432 nm                 | 353 nm                | 475 nm                | 2100 $\text{cm}^{-1}$ |
| acetone         | 436 nm                 | 353 nm                | 476 nm                | 1930 $\text{cm}^{-1}$ |
| DMSO            | 444 nm                 | 353 nm                | 485 nm                | 1900 $\text{cm}^{-1}$ |

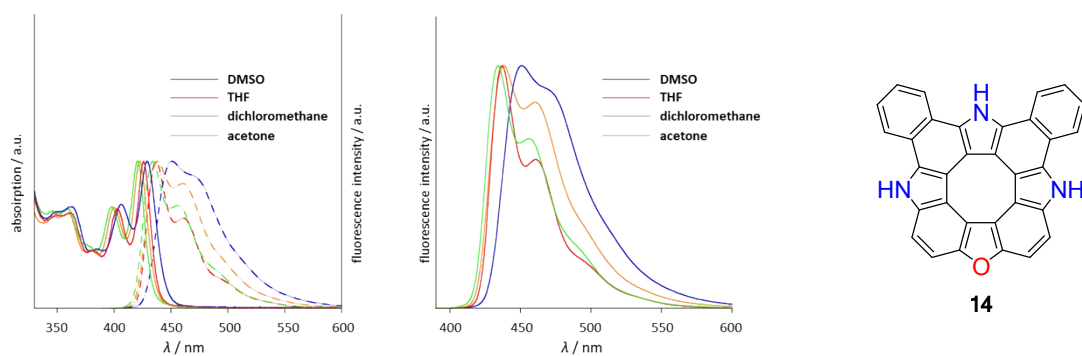

**Figure S7-5.** Normalized absorption and emission spectra of **14** in DMSO (blue line), THF (red line), acetone (orange line) and dichloromethane (green line).

**Table S7-4.** Summary of the optical properties of **14**.

| Solvent         | $\lambda_{\text{abs}}$ | $\lambda_{\text{ex}}$ | $\lambda_{\text{FL}}$ | Stokes shift          |
|-----------------|------------------------|-----------------------|-----------------------|-----------------------|
| THF             | 426 nm                 | 382 nm                | 437 nm                | 590 $\text{cm}^{-1}$  |
| dichloromethane | 420 nm                 | 380 nm                | 434 nm                | 770 $\text{cm}^{-1}$  |
| acetone         | 422 nm                 | 360 nm                | 438 nm                | 870 $\text{cm}^{-1}$  |
| DMSO            | 429 nm                 | 360 nm                | 449 nm                | 1040 $\text{cm}^{-1}$ |

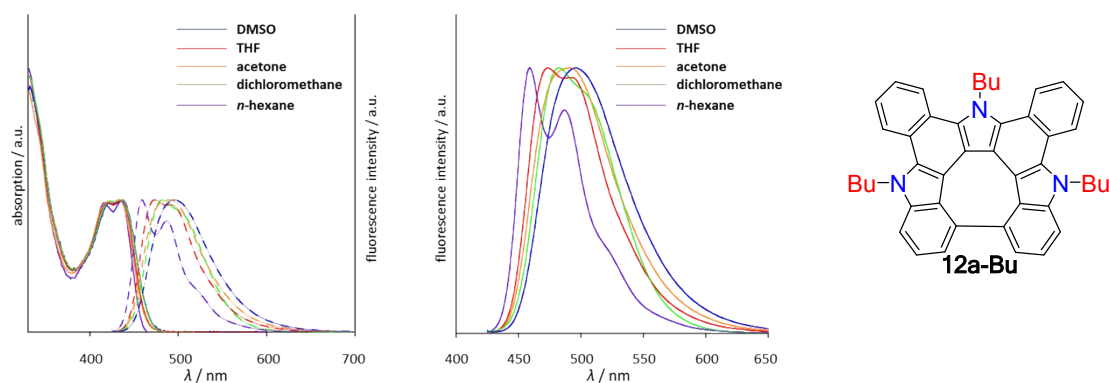

**Figure S7-6.** Normalized absorption and emission spectra of **12a-Bu** in DMSO (blue line), THF (red line), acetone (orange line), dichloromethane (green line) and *n*-hexane (purple line).

**Table S7-5.** Summary of the optical properties of **12a-Bu**.

| Solvent          | $\lambda_{\text{abs}}$ | $\lambda_{\text{ex}}$ | $\lambda_{\text{FL}}$ | Stokes shift          |
|------------------|------------------------|-----------------------|-----------------------|-----------------------|
| <i>n</i> -hexane | 435 nm                 | 414 nm                | 459 nm                | 1200 $\text{cm}^{-1}$ |
| THF              | 436 nm                 | 419 nm                | 473 nm                | 1790 $\text{cm}^{-1}$ |
| dichloromethane  | 436 nm                 | 331 nm                | 482 nm                | 2190 $\text{cm}^{-1}$ |
| acetone          | 432 nm                 | 430 nm                | 491 nm                | 2780 $\text{cm}^{-1}$ |
| DMSO             | 435 nm                 | 420 nm                | 496 nm                | 2830 $\text{cm}^{-1}$ |



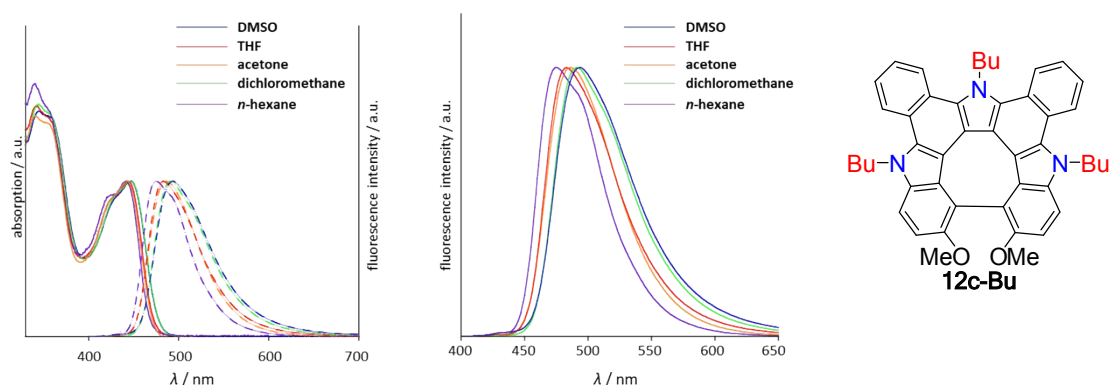

**Figure S7-7.** Normalized absorption and emission spectra of **12c-Bu** in DMSO (blue line), THF (red line), acetone (orange line), dichloromethane (green line) and *n*-hexane (purple line).

**Table S7-6.** Summary of the optical properties of **12c-Bu**.

| Solvent          | $\lambda_{\text{abs}}$ | $\lambda_{\text{ex}}$ | $\lambda_{\text{FL}}$ | Stokes shift          |
|------------------|------------------------|-----------------------|-----------------------|-----------------------|
| <i>n</i> -hexane | 442 nm                 | 430 nm                | 475 nm                | 1570 $\text{cm}^{-1}$ |
| THF              | 443 nm                 | 380 nm                | 483 nm                | 1870 $\text{cm}^{-1}$ |
| dichloromethane  | 447 nm                 | 380 nm                | 491 nm                | 2000 $\text{cm}^{-1}$ |
| acetone          | 443 nm                 | 430 nm                | 486 nm                | 2000 $\text{cm}^{-1}$ |
| DMSO             | 447 nm                 | 380 nm                | 494 nm                | 2130 $\text{cm}^{-1}$ |

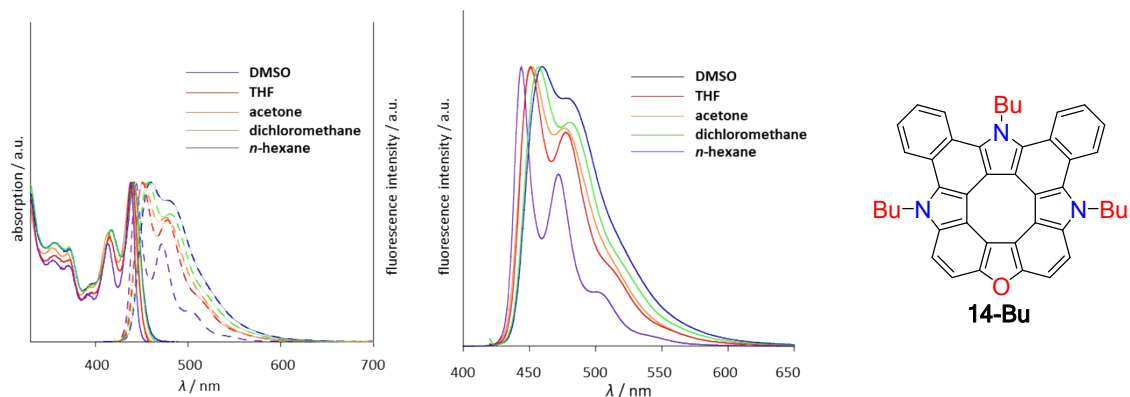

**Figure S7-8.** Normalized absorption and emission spectra of **14-Bu** in DMSO (blue line), THF (red line), acetone (orange line), dichloromethane (green line) and *n*-hexane (purple line).

**Table S7-7.** Summary of the optical properties of **14-Bu**.

| Solvent          | $\lambda_{\text{abs}}$ | $\lambda_{\text{ex}}$ | $\lambda_{\text{FL}}$ | Stokes shift         |
|------------------|------------------------|-----------------------|-----------------------|----------------------|
| <i>n</i> -hexane | 438 nm                 | 414 nm                | 444 nm                | 610 $\text{cm}^{-1}$ |
| THF              | 440 nm                 | 416 nm                | 451 nm                | 550 $\text{cm}^{-1}$ |
| dichloromethane  | 441 nm                 | 417 nm                | 457 nm                | 790 $\text{cm}^{-1}$ |
| acetone          | 438 nm                 | 414 nm                | 452 nm                | 710 $\text{cm}^{-1}$ |
| DMSO             | 442 nm                 | 417 nm                | 460 nm                | 890 $\text{cm}^{-1}$ |

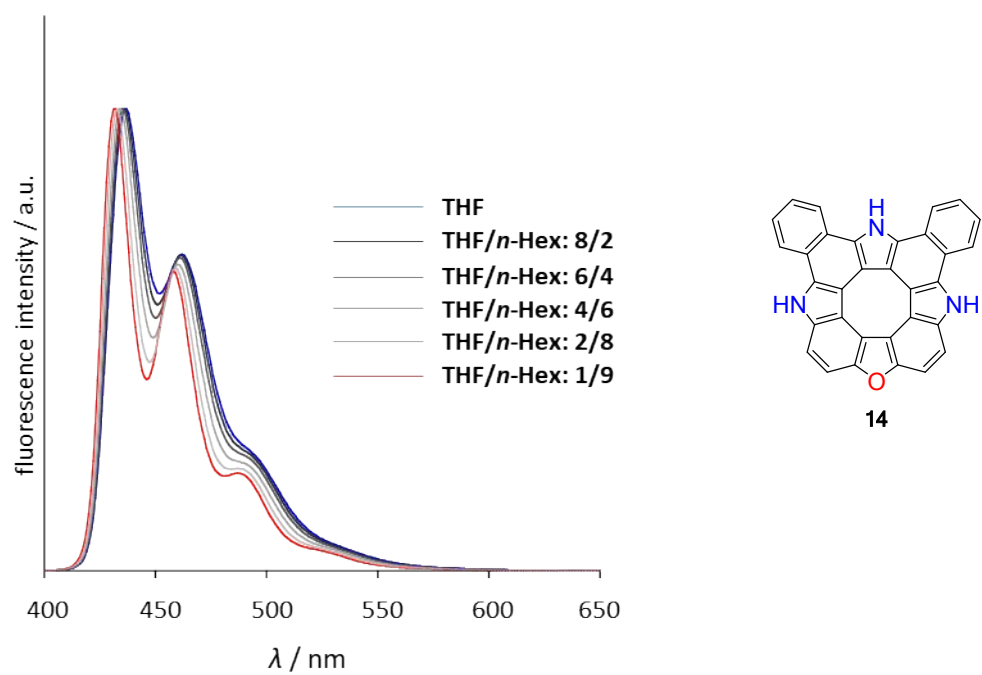

**Figure S7-9.** Normalized fluorescence spectra of **14** in binary solvent system (THF/*n*-hexane).

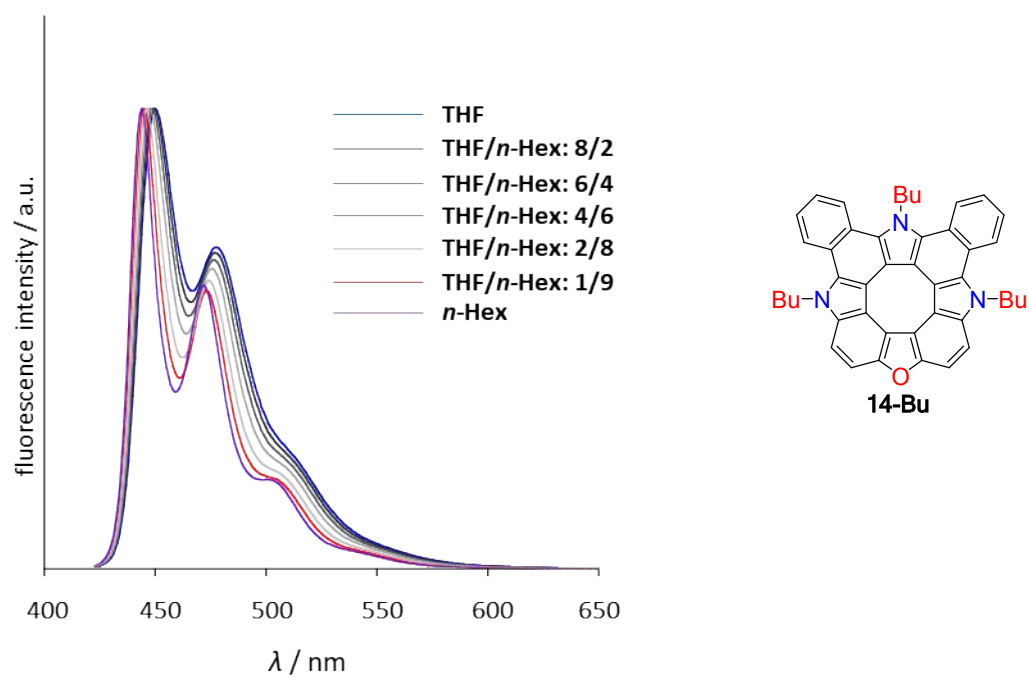

**Figure S7-10.** Normalized fluorescence spectra of **14-Bu** in binary solvent system (THF/*n*-hexane).

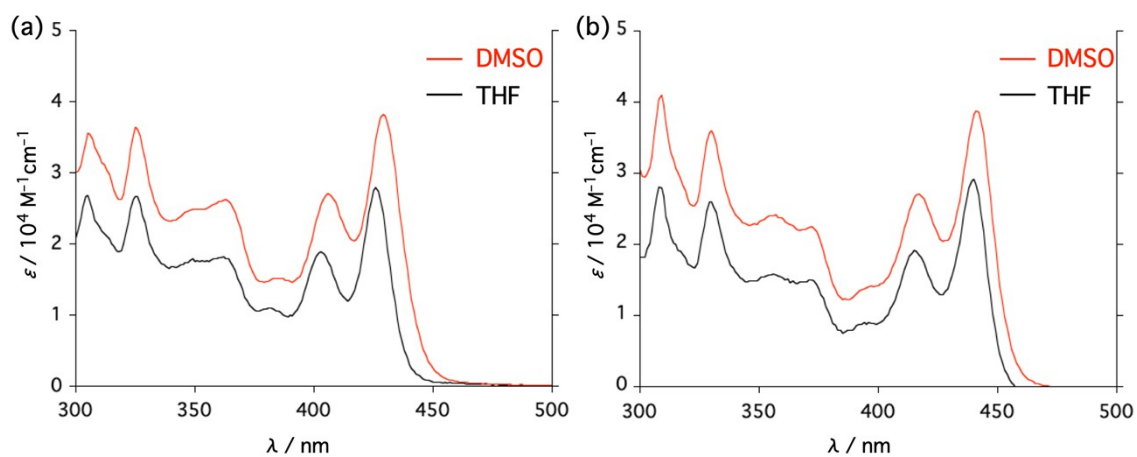

**Figure S7-11.** UV/Vis absorption spectra of (a) **14** and (b) **14-Bu** in THF (black) and DMSO (red).

## 8. Fluorescence Lifetime

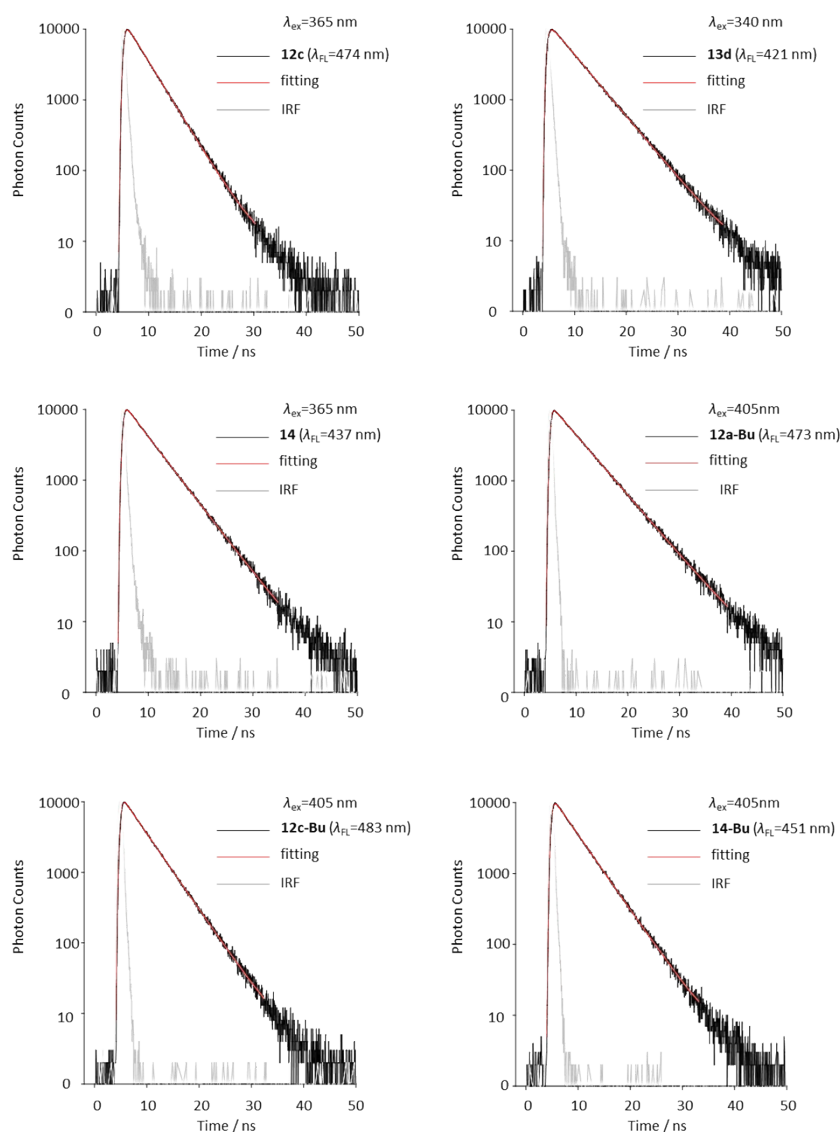

**Figure S8-1.** Fluorescence decay profiles of **12c**, **13d**, **14**, **12a-Bu**, **12c-Bu** and **14** in THF.

(IRF = instrumental response function)

**Table S8-1.** Summary of the optical properties

| compound      | $\lambda_{\text{ex}}$ | $\Phi_{\text{F}}$ | $\lambda_{\text{FL}}$ | $\tau_{\text{f}}$ [ns] | $k_{\text{f}}$ [ $10^8 \text{ s}^{-1}$ ] | $k_{\text{nr}}$ [ $10^8 \text{ s}^{-1}$ ] |
|---------------|-----------------------|-------------------|-----------------------|------------------------|------------------------------------------|-------------------------------------------|
| <b>12c</b>    | 317 nm                | 0.33              | 476 nm                | 3.6 <sup>[a]</sup>     | 0.85                                     | 1.9                                       |
| <b>13d</b>    | 338 nm                | 0.26              | 421 nm                | 5.0 <sup>[b]</sup>     | 0.52                                     | 1.5                                       |
| <b>14</b>     | 325 nm                | 0.52              | 437 nm                | 4.5 <sup>[a]</sup>     | 1.2                                      | 1.1                                       |
| <b>12a-Bu</b> | 419 nm                | 0.29              | 473 nm                | 5.1 <sup>[c]</sup>     | 0.59                                     | 1.4                                       |
| <b>12c-Bu</b> | 443 nm                | 0.33              | 491 nm                | 4.0 <sup>[c]</sup>     | 0.82                                     | 1.7                                       |
| <b>14-Bu</b>  | 417 nm                | 0.40              | 451 nm                | 4.1 <sup>[c]</sup>     | 0.97                                     | 1.5                                       |

[a]  $\lambda_{\text{ex}} = 365 \text{ nm}$  [b]  $\lambda_{\text{ex}} = 340 \text{ nm}$  [c]  $\lambda_{\text{ex}} = 405 \text{ nm}$

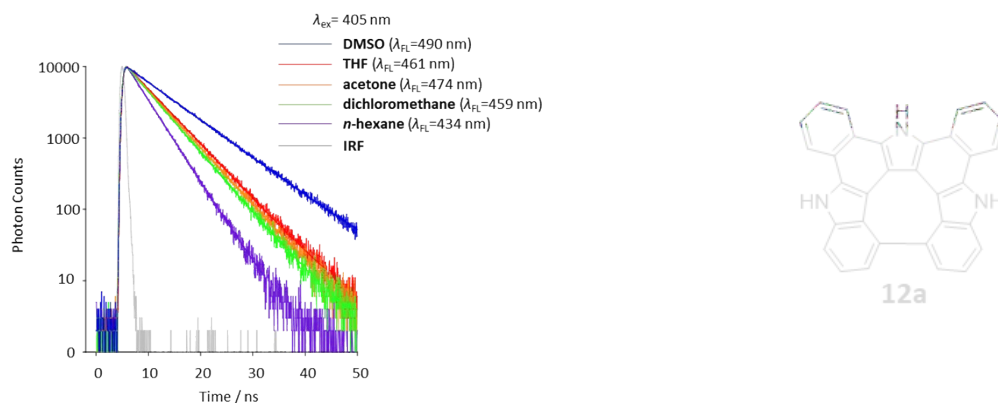

**Figure S8-2.** Fluorescence decay profiles of **12a** in DMSO (blue line), THF (red line), acetone (orange line), dichloromethane (green line) and *n*-hexane (purple line).

**Table S8-2.** Summary of optical properties of **12a**.

| Solvent          | $\lambda_{\text{ex}}$ | $\Phi_{\text{f}}$ | $\lambda_{\text{FL}}$ | $\tau_{\text{f}}^{[\text{a}]}$ [ns] | $k_{\text{r}}$ [ $10^8 \text{ s}^{-1}$ ] | $k_{\text{nr}}$ [ $10^8 \text{ s}^{-1}$ ] |
|------------------|-----------------------|-------------------|-----------------------|-------------------------------------|------------------------------------------|-------------------------------------------|
| <i>n</i> -hexane | 400 nm                | 0.11              | 434 nm                | 3.8                                 | 0.30                                     | 2.3                                       |
| acetone          | 411 nm                | 0.32              | 474 nm                | 5.4                                 | 0.59                                     | 1.3                                       |
| dichloromethane  | 406 nm                | 0.39              | 459 nm                | 5.1                                 | 0.75                                     | 1.2                                       |
| THF              | 412 nm                | 0.47              | 461 nm                | 5.6                                 | 0.83                                     | 0.93                                      |
| DMSO             | 419 nm                | 0.58              | 490 nm                | 8.2                                 | 0.71                                     | 0.51                                      |

[a]  $\lambda_{\text{ex}} = 405 \text{ nm}$

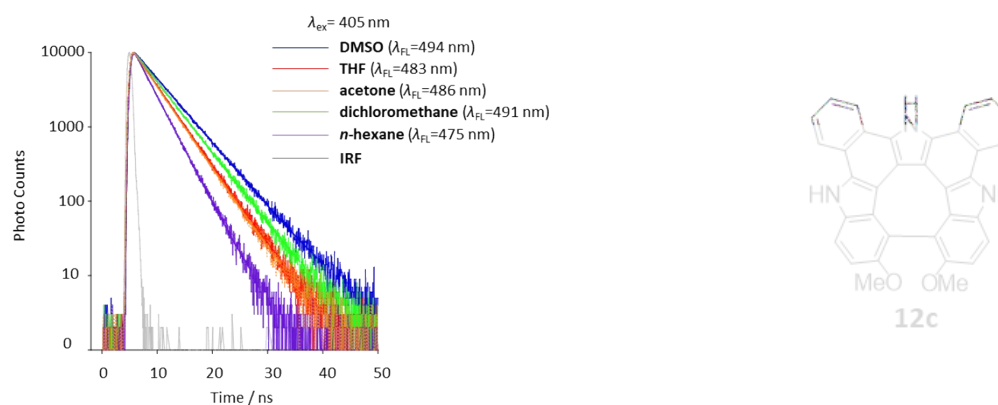

**Figure S8-3.** Fluorescence decay profiles of **12c** in DMSO (blue line), THF (red line), acetone (orange line) and dichloromethane (green line).

**Table S8-3.** Summary of optical properties of **12c**.

| Solvent         | $\lambda_{\text{ex}}$ | $\Phi_{\text{f}}$ | $\lambda_{\text{FL}}$ | $\tau_{\text{f}}^{[\text{a}]}$ [ns] | $k_{\text{r}}$ [ $10^8 \text{ s}^{-1}$ ] | $k_{\text{nr}}$ [ $10^8 \text{ s}^{-1}$ ] |
|-----------------|-----------------------|-------------------|-----------------------|-------------------------------------|------------------------------------------|-------------------------------------------|
| acetone         | 353 nm                | 0.29              | 476 nm                | 3.4                                 | 0.85                                     | 2.1                                       |
| dichloromethane | 353 nm                | 0.37              | 475 nm                | 3.4                                 | 1.1                                      | 1.9                                       |
| THF             | 317 nm                | 0.33              | 474 nm                | 3.6                                 | 0.92                                     | 1.9                                       |
| DMSO            | 353 nm                | 0.49              | 485 nm                | 4.6                                 | 1.1                                      | 1.1                                       |

[a]  $\lambda_{\text{ex}} = 365 \text{ nm}$

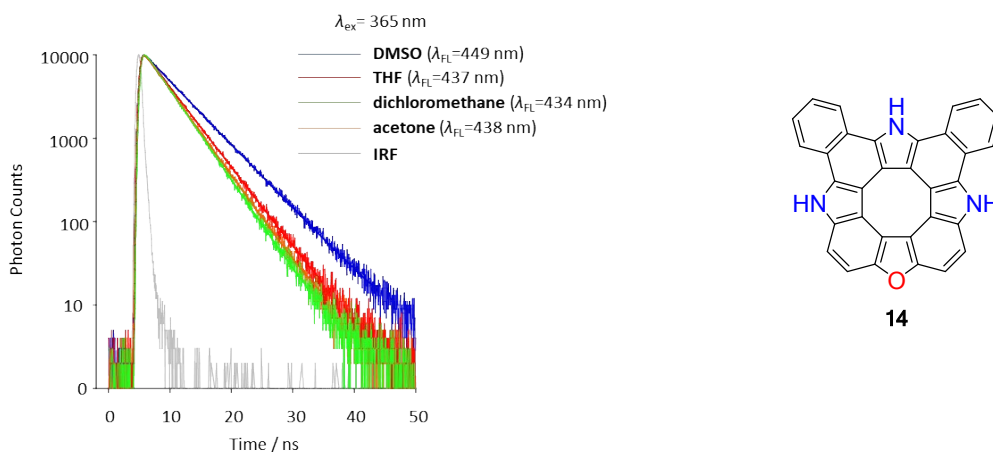

**Figure S8-4.** Fluorescence decay profiles of **14** in DMSO (blue line), THF (red line), acetone (orange line) and dichloromethane (green line).

**Table S8-4.** Summary of optical properties of **14**.

| Solvent         | $\lambda_{\text{ex}}$ | $\Phi_{\text{f}}$ | $\lambda_{\text{fl}}$ | $\tau_{\text{f}}^{[a]}$ [ns] | $k_{\text{r}}$ [ $10^8 \text{ s}^{-1}$ ] | $k_{\text{nr}}$ [ $10^8 \text{ s}^{-1}$ ] |
|-----------------|-----------------------|-------------------|-----------------------|------------------------------|------------------------------------------|-------------------------------------------|
| acetone         | 360 nm                | 0.45              | 438 nm                | 4.2                          | 1.1                                      | 1.3                                       |
| dichloromethane | 380 nm                | 0.39              | 434 nm                | 4.0                          | 0.96                                     | 1.5                                       |
| THF             | 325 nm                | 0.52              | 437 nm                | 4.5                          | 1.2                                      | 1.1                                       |
| DMSO            | 360 nm                | 0.72              | 449 nm                | 5.7                          | 1.3                                      | 0.50                                      |

[a]  $\lambda_{\text{ex}} = 365 \text{ nm}$

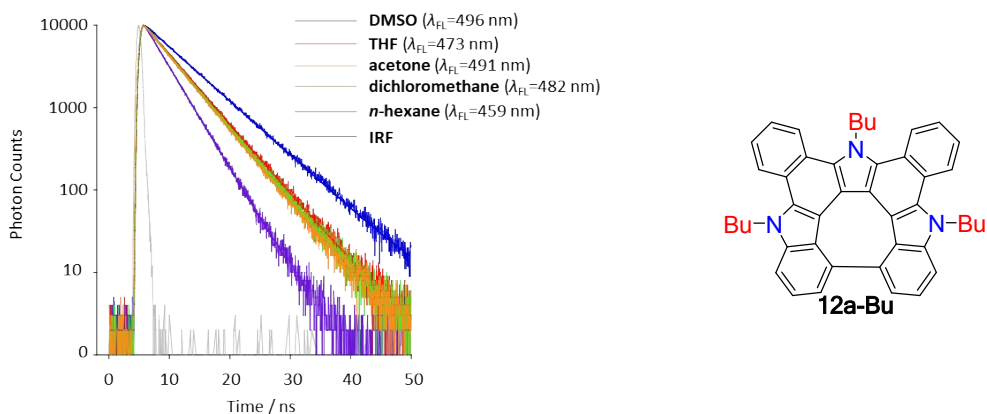

**Figure S8-5.** Fluorescence decay profiles of **12a-Bu** in DMSO (blue line), THF (red line), acetone (orange line), dichloromethane (green line) and *n*-hexane (purple line).

**Table S8-5.** Summary of optical properties of **12a-Bu**.

| Solvent          | $\lambda_{\text{ex}}$ | $\Phi_{\text{f}}$ | $\lambda_{\text{fl}}$ | $\tau_{\text{f}}^{[a]}$ [ns] | $k_{\text{r}}$ [ $10^8 \text{ s}^{-1}$ ] | $k_{\text{nr}}$ [ $10^8 \text{ s}^{-1}$ ] |
|------------------|-----------------------|-------------------|-----------------------|------------------------------|------------------------------------------|-------------------------------------------|
| <i>n</i> -hexane | 414 nm                | 0.20              | 459 nm                | 3.5                          | 0.58                                     | 2.2                                       |
| acetone          | 430 nm                | 0.24              | 491 nm                | 4.8                          | 0.49                                     | 1.6                                       |
| dichloromethane  | 331 nm                | 0.29              | 482 nm                | 4.9                          | 0.60                                     | 1.4                                       |
| THF              | 419 nm                | 0.30              | 473 nm                | 5.1                          | 0.59                                     | 1.4                                       |
| DMSO             | 420 nm                | 0.42              | 496 nm                | 6.7                          | 0.62                                     | 0.87                                      |

[a]  $\lambda_{\text{ex}} = 405 \text{ nm}$

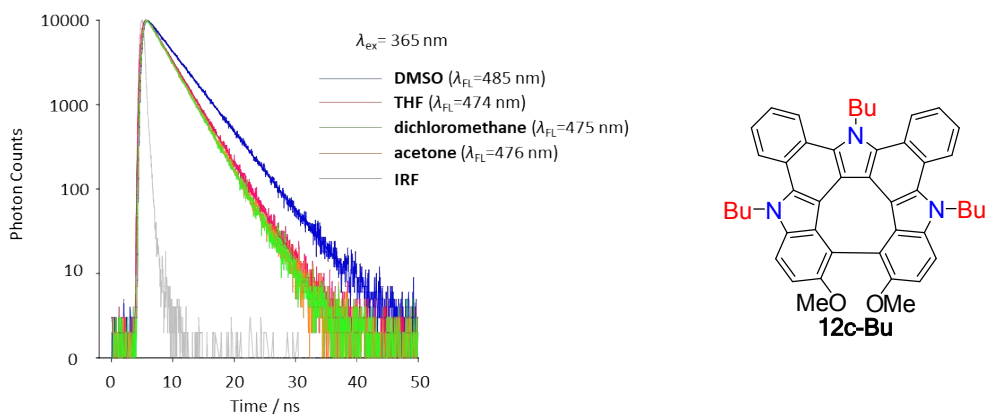

**Figure S8-6.** Fluorescence decay profiles of **12c-Bu** in DMSO (blue line), THF (red line), acetone (orange line), dichloromethane (green line) and *n*-hexane (purple line).

**Table S8-6.** Summary of optical properties of **12c-Bu**.

| Solvent          | $\lambda_{\text{ex}}$ | $\Phi_{\text{F}}$ | $\lambda_{\text{FL}}$ | $\tau_{\text{F}}^{[a]}$ [ns] | $k_{\text{r}}$ [ $10^8 \text{ s}^{-1}$ ] | $k_{\text{nr}}$ [ $10^8 \text{ s}^{-1}$ ] |
|------------------|-----------------------|-------------------|-----------------------|------------------------------|------------------------------------------|-------------------------------------------|
| <i>n</i> -hexane | 430 nm                | 0.20              | 475 nm                | 3.0                          | 0.67                                     | 2.7                                       |
| acetone          | 430 nm                | 0.31              | 486 nm                | 3.9                          | 0.77                                     | 1.8                                       |
| dichloromethane  | 447 nm                | 0.33              | 483 nm                | 4.5                          | 0.74                                     | 1.5                                       |
| THF              | 443 nm                | 0.33              | 491 nm                | 4.0                          | 0.82                                     | 1.7                                       |
| DMSO             | 447 nm                | 0.42              | 494 nm                | 5.0                          | 0.84                                     | 1.2                                       |

[a]  $\lambda_{\text{ex}} = 405 \text{ nm}$

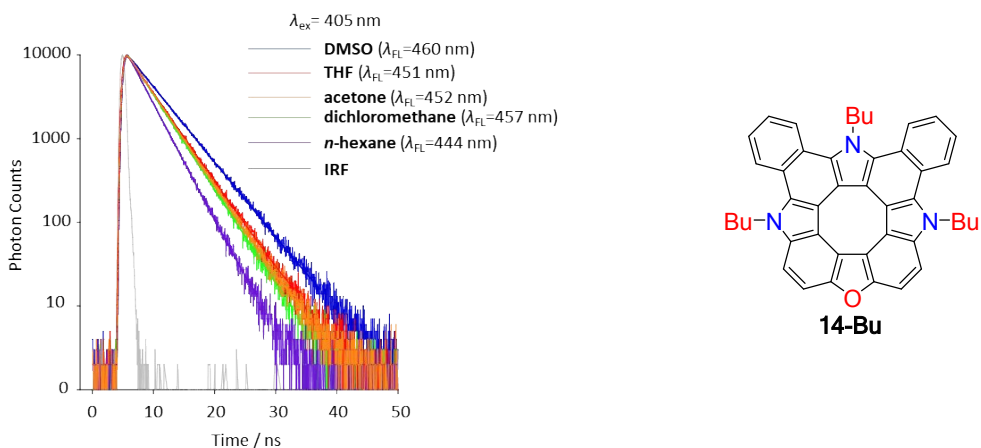

**Figure S8-7.** Fluorescence decay profiles of **14-Bu** in DMSO (blue line), THF (red line), acetone (orange line), dichloromethane (green line) and *n*-hexane (purple line).

**Table S8-7.** Summary of optical properties of **14-Bu**.

| Solvent          | $\lambda_{\text{ex}}$ | $\Phi_{\text{F}}$ | $\lambda_{\text{FL}}$ | $\tau_{\text{F}}^{[a]}$ [ns] | $k_{\text{r}}$ [ $10^8 \text{ s}^{-1}$ ] | $k_{\text{nr}}$ [ $10^8 \text{ s}^{-1}$ ] |
|------------------|-----------------------|-------------------|-----------------------|------------------------------|------------------------------------------|-------------------------------------------|
| <i>n</i> -hexane | 414 nm                | 0.28              | 444 nm                | 3.1                          | 0.89                                     | 2.3                                       |
| acetone          | 414 nm                | 0.39              | 452 nm                | 3.9                          | 0.98                                     | 1.6                                       |
| dichloromethane  | 417 nm                | 0.39              | 457 nm                | 3.8                          | 1.0                                      | 1.5                                       |
| THF              | 416 nm                | 0.40              | 451 nm                | 4.1                          | 0.97                                     | 1.5                                       |
| DMSO             | 417 nm                | 0.70              | 460 nm                | 4.8                          | 1.5                                      | 0.62                                      |

[a]  $\lambda_{\text{ex}} = 405 \text{ nm}$

## 9. Solubility

The solubilities of **14** and **14-Bu** were measured by the following procedures. (1) A small amount of solvents was added to the solids of each compounds. (2) The resulting suspension was sonicated for 30 sec and the insoluble residue was removed by filtration. (3) The weight of the saturated solution (filtrate) was measured.

**Table S9-1.** Solubilities of **14** and **14-Bu**

| Solvent              | acetone | dichloromethane | <i>n</i> -hexane | toluene | methanol | diethyl ether | THF |
|----------------------|---------|-----------------|------------------|---------|----------|---------------|-----|
| <b>14</b> (mg/mL)    | 4.6     | 0.15            | ≈ 0              | ≈ 0     | 4.2      | 0.54          | 21  |
| <b>14-Bu</b> (mg/mL) | 5.1     | 26              | 0.79             | 17      | 1.8      | 1.7           | >79 |

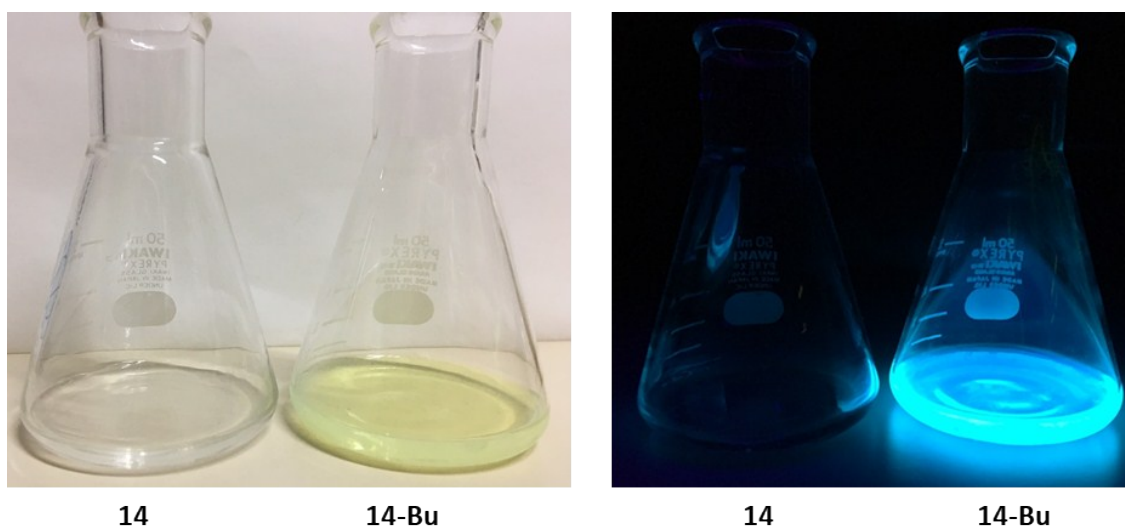

**Figure 9-1.** Filtrate of **14** and **14-Bu** in *n*-hexane (left: under room light, right: under UV light).



## 10. Optical Resolution

Optical separation of **12c-Bu** was performed on a Shimadzu LC-20 AT instrument equipped with a CHIRALPAK IA-3 chiral column ( $\Phi = 4.6$  mm). CD spectra were collected on a JASCO J-715 circular dichroism spectrometer at 298 K.

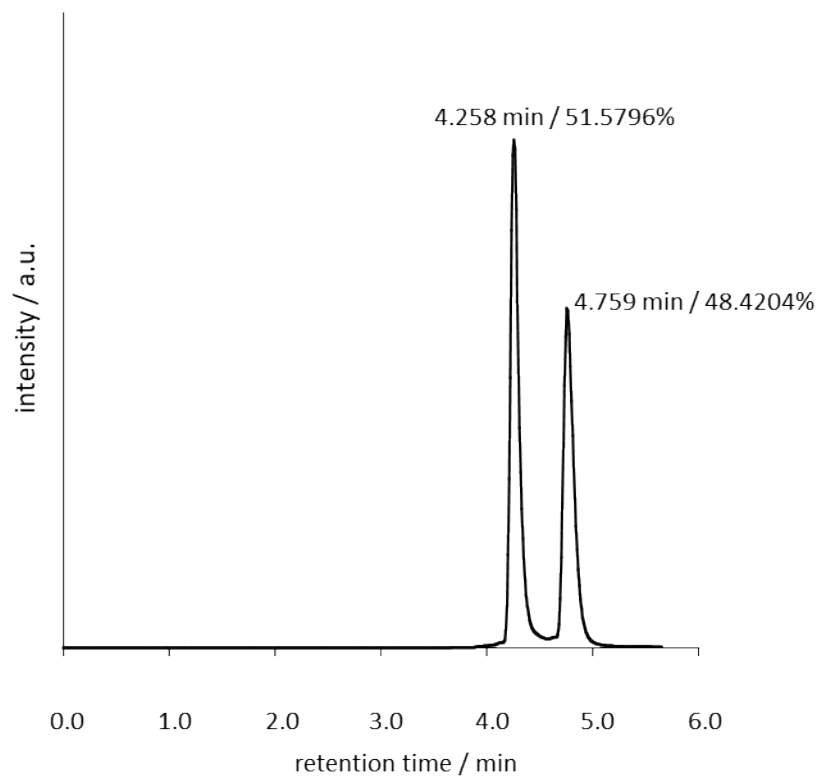

**Figure S10-1.** Chiral HPLC analysis of **12c-Bu** eluted by dichloromethane using CHIRALPAK IA-3 with a flow rate of 0.9 mL/min.

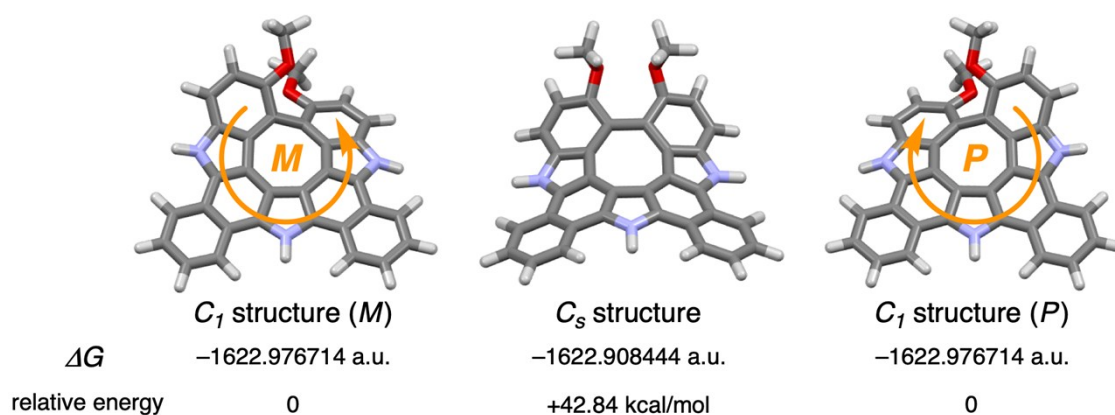

**Figure S10-2.** Calculated structures of **12c** with  $C_1$  and  $C_s$  symmetry restrictions. The calculations were performed at B3LYP/6-311G(d,p) level of theory.

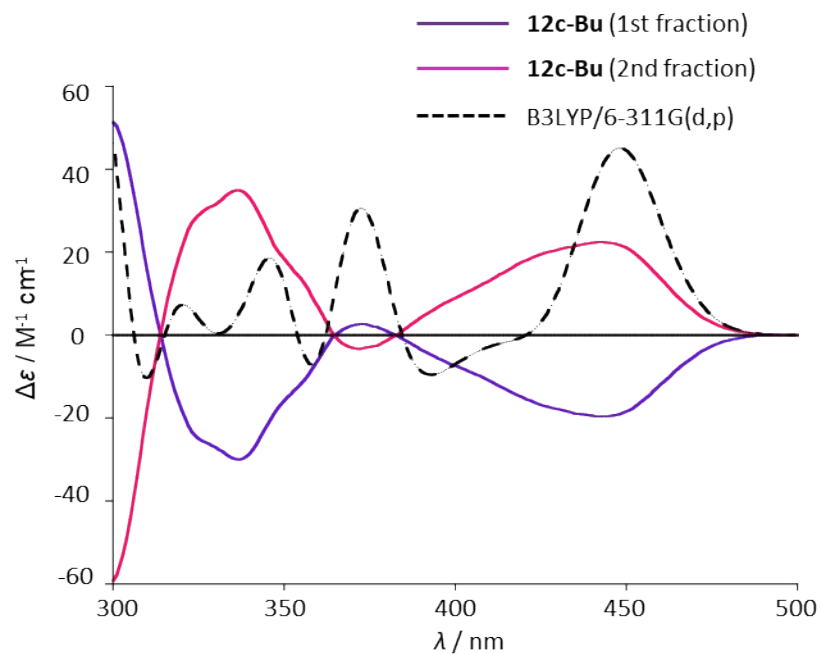

**Figure S10-3.** Experimental CD spectrum (purple and pink, solid line) in dichloromethane and simulated CD spectrum (black, broken line) of the (*P*)-enantiomer of **12c-Bu** calculated by TD-DFT at the B3LYP/6-311G(d,p) level.

## 11. Supporting References

- [S1] F. Chen, T. Tanaka, T. Mori and A. Osuka, *Chem. Eur. J.*, 2018, **24**, 7489.
- [S2] M. E. Hoque, R. Bisht, C. Haldar and B. Chattopadhyay, *J. Am. Chem. Soc.*, 2017, **139**, 7745.
- [S3] a) G. M. Sheldrick, *Acta Cryst. A*, 2008, **64**, 112, b) G. M. Sheldrick, *Acta Cryst. C*, 2015, **71**, 3.
- [S4] Gaussian 16, Revision A.03, M. J. Frisch, G. W. Trucks, H. B. Schlegel, G. E. Scuseria, M. A. Robb, J. R. Cheeseman, G. Scalmani, V. Barone, G. A. Petersson, H. Nakatsuji, X. Li, M. Caricato, A. V. Marenich, J. Bloino, B. G. Janesko, R. Gomperts, B. Mennucci, H. P. Hratchian, J. V. Ortiz, A. F. Izmaylov, J. L. Sonnenberg, D. Williams-Young, F. Ding, F. Lipparini, F. Egidi, J. Goings, B. Peng, A. Petrone, T. Henderson, D. Ranasinghe, V. G. Zakrzewski, J. Gao, N. Rega, G. Zheng, W. Liang, M. Hada, M. Ehara, K. Toyota, R. Fukuda, J. Hasegawa, M. Ishida, T. Nakajima, Y. Honda, O. Kitao, H. Nakai, T. Vreven, K. Throssell, J. A. Montgomery, Jr., J. E. Peralta, F. Ogliaro, M. J. Bearpark, J. J. Heyd, E. N. Brothers, K. N. Kudin, V. N. Staroverov, T. A. Keith, R. Kobayashi, J. Normand, K. Raghavachari, A. P. Rendell, J. C. Burant, S. S. Iyengar, J. Tomasi, M. Cossi, J. M. Millam, M. Klene, C. Adamo, R. Cammi, J. W. Ochterski, R. L. Martin, K. Morokuma, O. Farkas, J. B. Foresman and D. J. Fox, Gaussian, Inc., Wallingford CT, 2016.
- [S5] a) A. D. Becke, *J. Chem. Phys.*, 1993, **98**, 1372. b) C. Lee, W. Yang and R. G. Parr, *Phys. Rev. B*, 1988, **37**, 785.
- [S6] H. F. B. Shidaei, C. S. Wannere, C. Corminboeuf, R. Puchta and P. v. R. Schleyer, *Org. Lett.*, 2006, **8**, 863.
- [S7] T. M. Krygowski, H. Szatyłowicz, O. A. Stasyuk, J. Dominikowska and M. Palusiak, *Chem. Rev.*, 2014, **114**, 6383.
